# Supplementary material for: Angular Regioselective Synthesis of Varied Functionalized Hexahydro-1,2,4-triazolo[4,3-a]quinazolin-9-ones and Their Antiproliferative Action
Source: MDPI journal article supplement (doi:10.3390/molecules28093718), 2023-04-25

# Angular Regioselective Synthesis of Varied Functionalized Hexahydro[1,2,4]triazolo[4,3-*a*]quinazolin-9-ones and Their Antiproliferative Action

## Table of Contents:

### Copies of NMR spectra of compounds 4 and 5:

|                                                                                                                                                                                                        |            |
|--------------------------------------------------------------------------------------------------------------------------------------------------------------------------------------------------------|------------|
| (4a <i>S</i> <sup>*</sup> ,8a <i>R</i> <sup>*</sup> )-Ethyl 9-oxo-1-phenyl-1,4a,5,8,8a,9-hexahydro[1,2,4]triazolo[4,3- <i>a</i> ]quinazoline-3-carboxylate ( <b>4a</b> ) .....                         | <b>S3</b>  |
| (4a <i>S</i> <sup>*</sup> ,8a <i>R</i> <sup>*</sup> )-Ethyl 9-oxo-1-( <i>p</i> -tolyl)-1,4a,5,8,8a,9-hexahydro[1,2,4]triazolo[4,3- <i>a</i> ]quinazoline-3-carboxylate ( <b>4b</b> ) .....             | <b>S6</b>  |
| (4a <i>S</i> <sup>*</sup> ,8a <i>R</i> <sup>*</sup> )-Ethyl 9-oxo-1-(4-nitrophenyl)-1,4a,5,8,8a,9-hexahydro-[1,2,4]triazolo[4,3- <i>a</i> ]quinazoline-3-carboxylate ( <b>4c</b> ) .....               | <b>S9</b>  |
| (4a <i>S</i> <sup>*</sup> ,8a <i>R</i> <sup>*</sup> )-Ethyl 9-oxo-1-(4-methoxyphenyl)-1,4a,5,8,8a,9-hexahydro[1,2,4]triazolo-[4,3- <i>a</i> ]quinazoline-3-carboxylate ( <b>4d</b> ) .....             | <b>S10</b> |
| (4a <i>S</i> <sup>*</sup> ,8a <i>R</i> <sup>*</sup> )-Ethyl 9-oxo-1-(4-chlorophenyl)-1,4a,5,8,8a,9-hexahydro[1,2,4]triazolo[4,3- <i>a</i> ]quinazoline-3-carboxylate ( <b>4e</b> ) .....               | <b>S13</b> |
| (4a <i>S</i> <sup>*</sup> ,8a <i>R</i> <sup>*</sup> )-Ethyl 9-oxo-1-(3-(trifluoromethyl)phenyl)-1,4a,5,8,8a,9-hexahydro[1,2,4]triazolo-[4,3- <i>a</i> ]quinazoline-3-carboxylate ( <b>4f</b> ) .....   | <b>S14</b> |
| (4a <i>S</i> <sup>*</sup> ,8a <i>R</i> <sup>*</sup> )-3-Acetyl-1-( <i>p</i> -tolyl)-4a,5,8,9-tetrahydro[1,2,4]triazolo[4,3- <i>a</i> ]quinazoline-9(1 <i>H</i> )-one ( <b>4g</b> ) ..                  | <b>S15</b> |
| (4a <i>S</i> <sup>*</sup> ,8a <i>R</i> <sup>*</sup> )-9-Oxo- <i>N</i> -Phenyl-1-( <i>p</i> -tolyl)-1,4a,5,8,8a,9-hexahydro[1,2,4]triazolo[4,3- <i>a</i> ]quinazoline-3-carboxamide ( <b>4h</b> ) ..... | <b>S16</b> |
| (4a <i>S</i> <sup>*</sup> ,8a <i>S</i> <sup>*</sup> )-Ethyl 9-oxo-1-phenyl-1,4a,5,8,8a,9-hexahydro-[1,2,4]triazolo[4,3- <i>a</i> ]quinazoline-3-carboxylate ( <b>5a</b> ) .....                        | <b>S17</b> |
| (4a <i>S</i> <sup>*</sup> ,8a <i>S</i> <sup>*</sup> )-Ethyl 9-oxo-1-( <i>p</i> -tolyl)-1,4a,5,8,8a,9-hexahydro-[1,2,4]triazolo[4,3- <i>a</i> ]quinazoline-3-carboxylate ( <b>5b</b> ) .....            | <b>S21</b> |
| (4a <i>S</i> <sup>*</sup> ,8a <i>S</i> <sup>*</sup> )-Ethyl 1-(4-nitrophenyl)-9-oxo-1,4a,5,8,8a,9-hexahydro-[1,2,4]triazolo[4,3- <i>a</i> ]quinazoline-3-carboxylate ( <b>5c</b> ) .....               | <b>S22</b> |
| (4a <i>S</i> <sup>*</sup> ,8a <i>S</i> <sup>*</sup> )-Ethyl 1-(4-methoxyphenyl)-9-oxo-1,4a,5,8,8a,9-hexahydro-[1,2,4]triazolo-[4,3- <i>a</i> ]quinazoline-3-carboxylate ( <b>5d</b> ) .....            | <b>S23</b> |
| (4a <i>S</i> <sup>*</sup> ,8a <i>S</i> <sup>*</sup> )-Ethyl 1-(4-chlorophenyl)-9-oxo-1,4a,5,8,8a,9-hexahydro-[1,2,4]triazolo[4,3- <i>a</i> ]quinazoline-3-carboxylate ( <b>5e</b> ) .....              | <b>S24</b> |
| (4a <i>S</i> <sup>*</sup> ,8a <i>S</i> <sup>*</sup> )-Ethyl 9-oxo-1-(3-(trifluoromethyl)phenyl)- 1,4a,5,8,8a,9-hexahydro-[1,2,4]triazolo-[4,3- <i>a</i> ]quinazoline-3-carboxylate ( <b>5f</b> ) ..... | <b>S25</b> |

|                                                                                                                                                                                                         |            |
|---------------------------------------------------------------------------------------------------------------------------------------------------------------------------------------------------------|------------|
| (4a <i>S</i> <sup>*</sup> ,8a <i>S</i> <sup>*</sup> )-3-Acetyl-1-( <i>p</i> -tolyl)-4a,5,8,9-tetrahydro-[1,2,4]triazolo[4,3- <i>a</i> ]quinazolin-9(1 <i>H</i> )-one ( <b>5g</b> ) ...                  | <b>S26</b> |
| (4a <i>S</i> <sup>*</sup> ,8a <i>S</i> <sup>*</sup> )-9-Oxo- <i>N</i> -phenyl-1-( <i>p</i> -tolyl)-1,4a,5,8,8a,9-hexahydro-[1,2,4]triazolo[4,3- <i>a</i> ]quinazoline-3-carboxamide ( <b>5h</b> ) ..... | <b>S27</b> |
| <b>Crystallographic details of compound 5a</b> .....                                                                                                                                                    | <b>S28</b> |
| <b>Copies of HRMS-ESI Spectra of compounds 4a-h and 5a-h</b> .....                                                                                                                                      | <b>S29</b> |

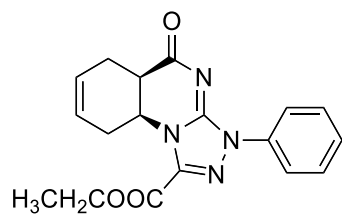

(4a*S*\*,8a*R*\*)-Ethyl 9-oxo-1-phenyl-1,4a,5,8,8a,9-hexahydro[1,2,4]triazolo[4,3-*a*]quinazoline-3-carboxylate (**4a**)

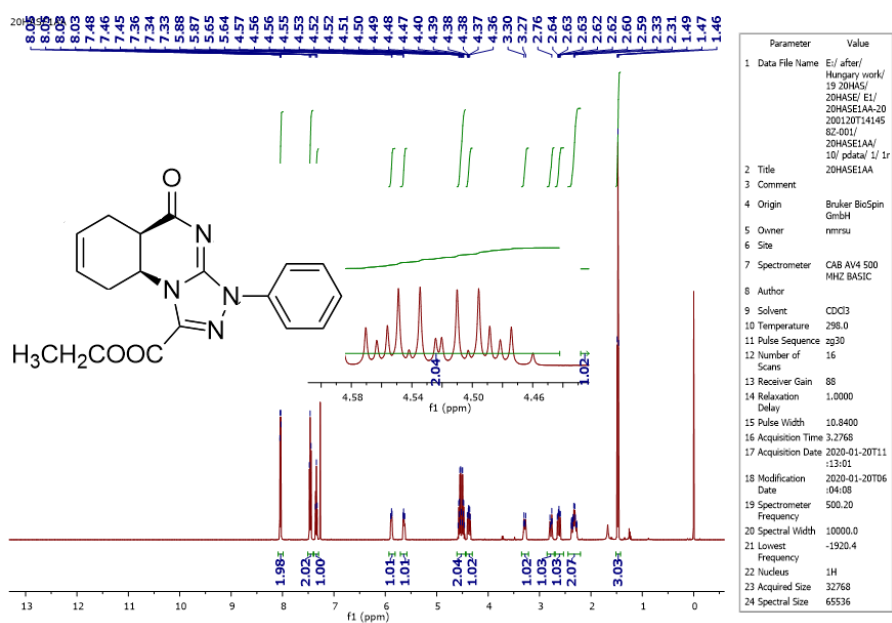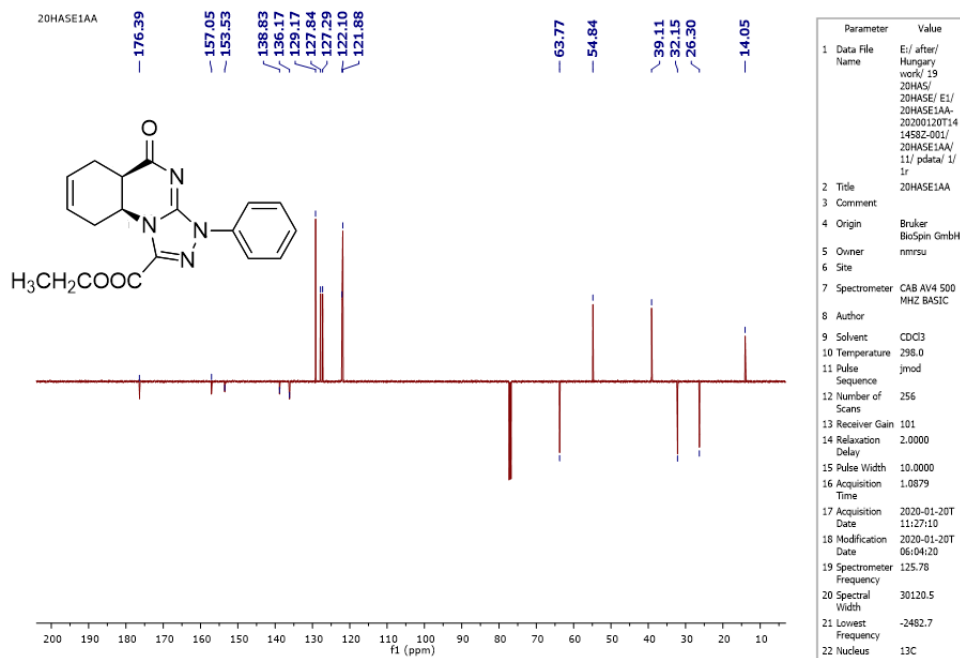

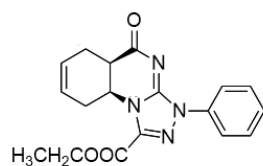

## COSY Experiments

### H-H Correlation

| f1 (ppm) | f2 (ppm) |
|----------|----------|
| 4.36     | 2.29     |
| 4.38     | 2.63     |
| 2.62     | 2.34     |
| 4.54     | 1.48     |
| 7.45     | 7.33     |
| 5.88     | 2.81     |
| 4.28     | 3.26     |
| 5.64     | 3.29     |
| 2.79     | 2.33     |
| 5.90     | 5.63     |
| 3.27     | 2.30     |
| 8.04     | 7.44     |

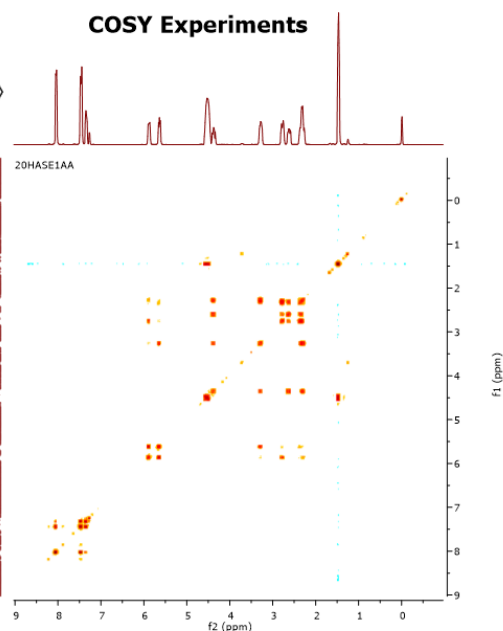

| Parameter                 | Value (f2, f1)                                                                                                 |
|---------------------------|----------------------------------------------------------------------------------------------------------------|
| 1 Data File Name          | E:/ after/ Hungary work/ 19 20HASE/ 20HASE/ E1/ 20HASE1AA-20 200120T14145 82-001/ 20HASE1AA/ 12/ pdata/ 1/ 2rr |
| 2 Title                   | 20HASE1AA                                                                                                      |
| 3 Comment                 |                                                                                                                |
| 4 Origin                  | Bruker BioSpin GmbH                                                                                            |
| 5 Owner                   | nmrsu                                                                                                          |
| 6 Site                    |                                                                                                                |
| 7 Spectrometer            | CAB AV4 500 MHZ BASIC                                                                                          |
| 8 Author                  |                                                                                                                |
| 9 Solvent                 | CDCl3                                                                                                          |
| 10 Temperature            | 298.0                                                                                                          |
| 11 Pulse Sequence         | cosypppqf                                                                                                      |
| 12 Number of Scans        | 1                                                                                                              |
| 13 Receiver Gain          | 101                                                                                                            |
| 14 Relaxation Delay       | 1.9508                                                                                                         |
| 15 Pulse Width            | 10.8400                                                                                                        |
| 16 Acquisition Time       | 0.2048                                                                                                         |
| 17 Acquisition Date       | 2020-01-20T11:33:00                                                                                            |
| 18 Modification Date      | 2020-01-20T06:04:30                                                                                            |
| 19 Spectrometer Frequency | (500.20, 500.20)                                                                                               |
| 20 Spectral Width         | (5000.0, 5000.0)                                                                                               |
| 21 Lowest Frequency       | (-483.9, -483.9)                                                                                               |
| 22 Nucleus                | (1H, 1H)                                                                                                       |
| 23 Acquired Size          | (1024, 128)                                                                                                    |
| 24 Spectral Size          | (1024, 1024)                                                                                                   |

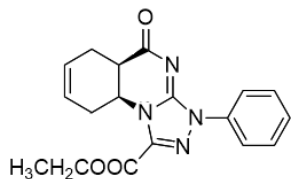

## TOCSY Experiments

### H-H Correction

| f1 (ppm) | f2 (ppm) |
|----------|----------|
| 5.88     | 2.75     |
| 4.52     | 1.46     |
| 5.64     | 3.28     |
| 4.37     | 2.77     |
| 4.37     | 2.33     |
| 8.04     | 7.35     |
| 4.37     | 2.62     |
| 5.64     | 2.62     |
| 4.52     | 1.48     |
| 4.37     | 3.28     |
| 5.64     | 2.77     |
| 5.88     | 2.79     |
| 8.04     | 7.46     |
| 5.88     | 2.30     |
| 5.64     | 2.34     |
| 5.88     | 3.28     |
| 5.88     | 2.62     |
| 5.88     | 5.64     |

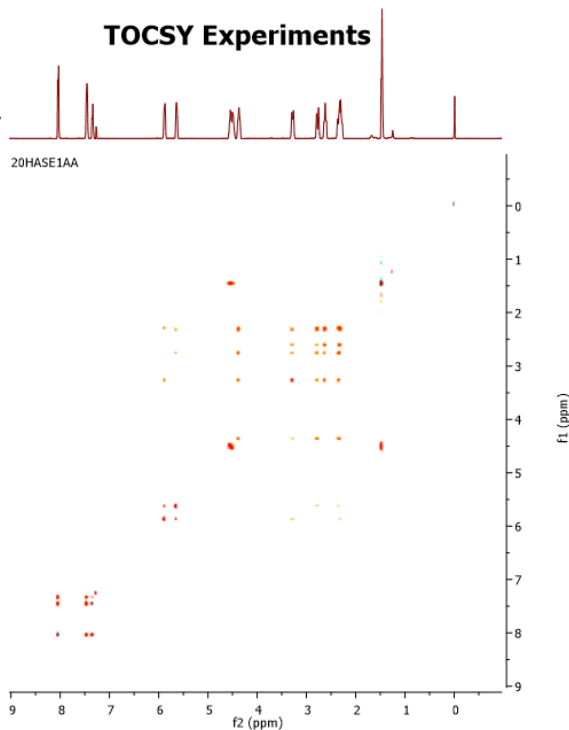

| Parameter                 | Value (f2, f1)                                                                                                 |
|---------------------------|----------------------------------------------------------------------------------------------------------------|
| 1 Data File Name          | E:/ after/ Hungary work/ 19 20HASE/ 20HASE/ E1/ 20HASE1AA-20 200120T14145 82-001/ 20HASE1AA/ 14/ pdata/ 1/ 2rr |
| 2 Title                   | 20HASE1AA                                                                                                      |
| 3 Comment                 |                                                                                                                |
| 4 Origin                  | Bruker BioSpin GmbH                                                                                            |
| 5 Owner                   | nmrsu                                                                                                          |
| 6 Site                    |                                                                                                                |
| 7 Spectrometer            | CAB AV4 500 MHZ BASIC                                                                                          |
| 8 Author                  |                                                                                                                |
| 9 Solvent                 | CDCl3                                                                                                          |
| 10 Temperature            | 298.0                                                                                                          |
| 11 Pulse Sequence         | mlevpphp                                                                                                       |
| 12 Number of Scans        | 8                                                                                                              |
| 13 Receiver Gain          | 101                                                                                                            |
| 14 Relaxation Delay       | 2.0000                                                                                                         |
| 15 Pulse Width            | 10.8400                                                                                                        |
| 16 Acquisition Time       | 0.2048                                                                                                         |
| 17 Acquisition Date       | 2020-01-20T13:39:13                                                                                            |
| 18 Modification Date      | 2020-01-20T06:04:54                                                                                            |
| 19 Spectrometer Frequency | (500.20, 500.20)                                                                                               |
| 20 Spectral Width         | (5000.0, 5000.0)                                                                                               |
| 21 Lowest Frequency       | (-483.9, -483.9)                                                                                               |
| 22 Nucleus                | (1H, 1H)                                                                                                       |
| 23 Acquired Size          | (1024, 256)                                                                                                    |
| 24 Spectral Size          | (1024, 1024)                                                                                                   |

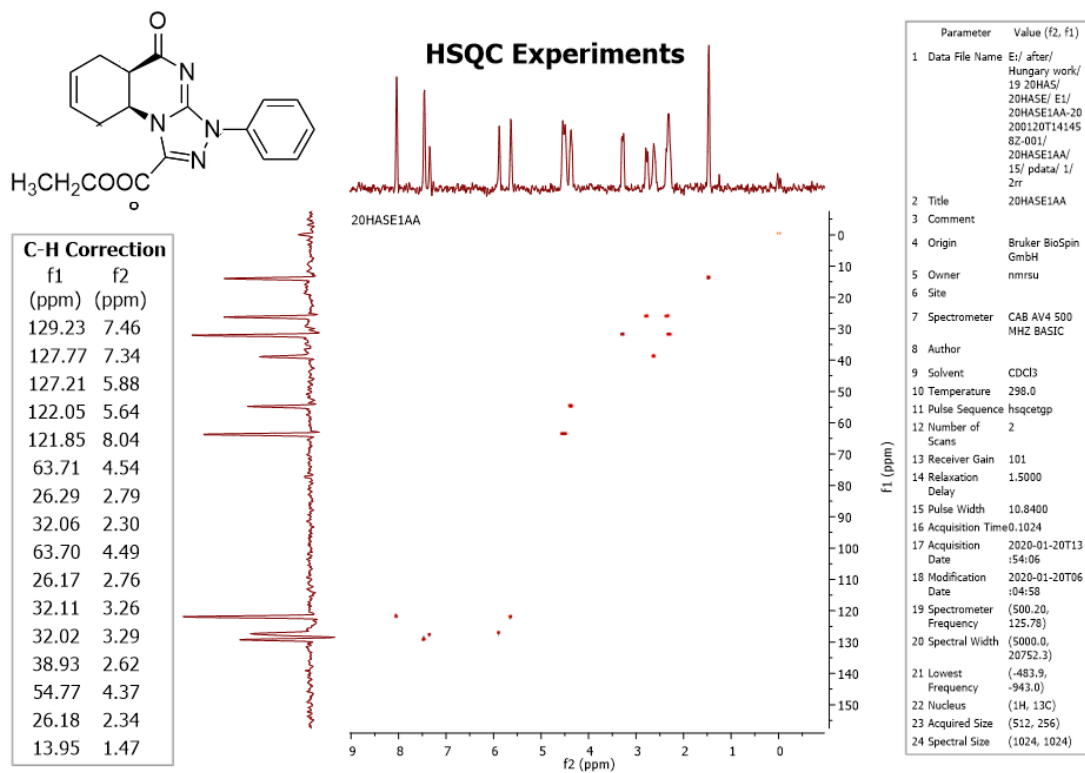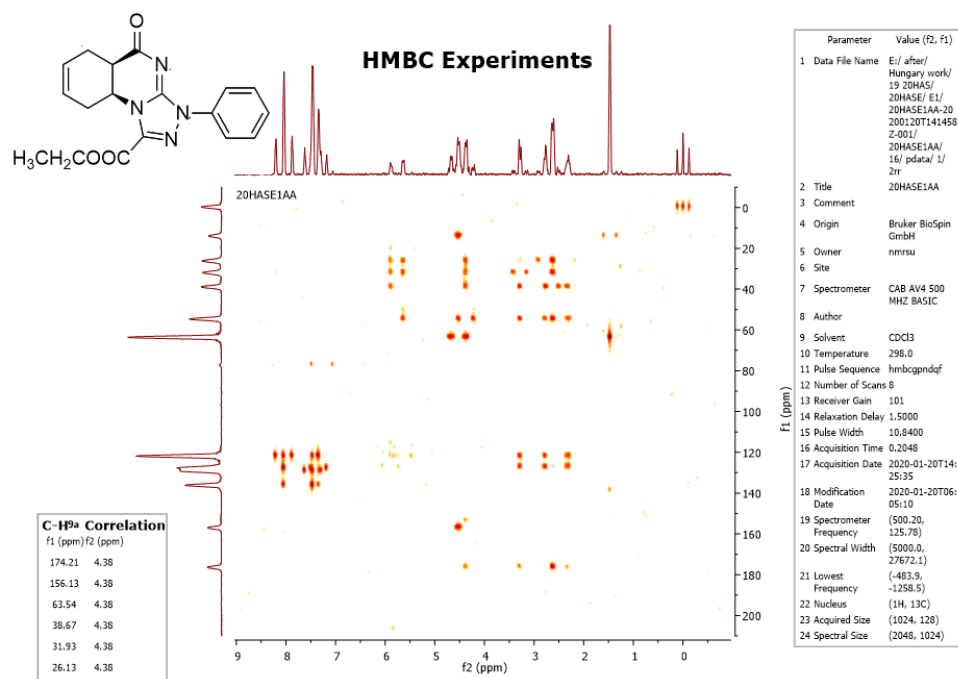

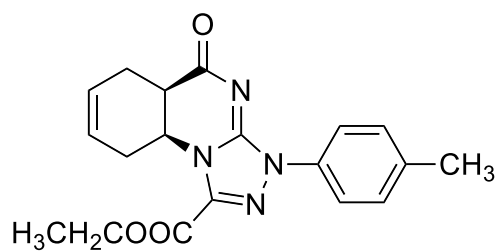

(4aS\*,8aR\*)-Ethyl

9-oxo-1-(p-tolyl)-1,4a,5,8,8a,9-

hexahydro[1,2,4]triazolo[4,3-a]quinazoline-3-carboxylate (**4b**)

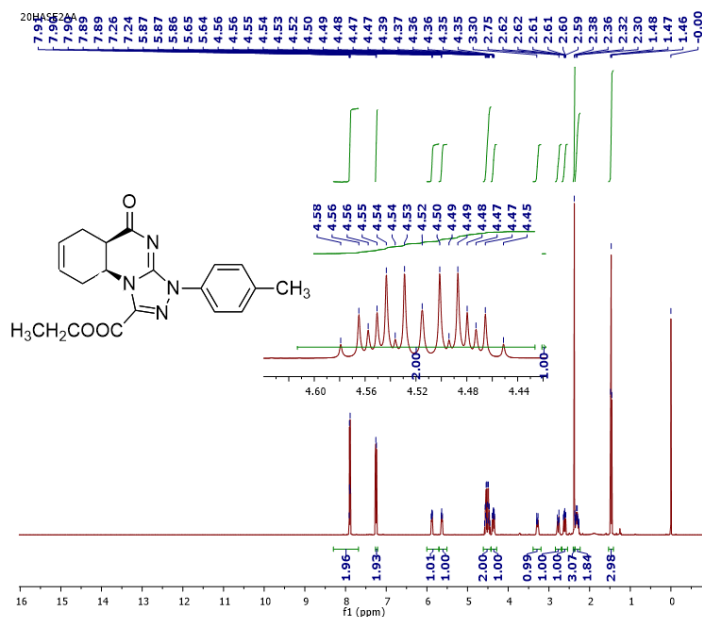

| Parameter                 | Value                                                                                                                   |
|---------------------------|-------------------------------------------------------------------------------------------------------------------------|
| 1 Data File Name          | Ei/ after/ Hungary work/ 19 20HASE/ 20HASE/ E2/ 20HASE2AA-20 2001277074948 2-001/ 20HASE2AA/ 10/ pdata/ 1/ 1r 20HASE2AA |
| 2 Title                   | 20HASE2AA                                                                                                               |
| 3 Comment                 |                                                                                                                         |
| 4 Origin                  | Bruker BioSpin                                                                                                          |
| 5 Owner                   | GmbH                                                                                                                    |
| 6 Site                    | nmrsu                                                                                                                   |
| 7 Spectrometer            | CAB AV4 500 MHz BASIC                                                                                                   |
| 8 Author                  |                                                                                                                         |
| 9 Solvent                 | CDCl3                                                                                                                   |
| 10 Temperature            | 298.0                                                                                                                   |
| 11 Pulse Sequence         | zg30                                                                                                                    |
| 12 Number of Scans        | 16                                                                                                                      |
| 13 Receiver Gain          | 90                                                                                                                      |
| 14 Relaxation Delay       | 1.0000                                                                                                                  |
| 15 Pulse Width            | 10.8400                                                                                                                 |
| 16 Acquisition Time       | 3.2768                                                                                                                  |
| 17 Acquisition Date       | 2020-01-24T18:45:00                                                                                                     |
| 18 Modification Date      | 2020-01-27T00:15:10                                                                                                     |
| 19 Spectrometer Frequency | 500.20                                                                                                                  |
| 20 Spectral Width         | 10000.0                                                                                                                 |
| 21 Lowest Frequency       | -1919.6                                                                                                                 |
| 22 Nucleus                | 1H                                                                                                                      |
| 23 Acquired Size          | 32768                                                                                                                   |
| 24 Spectral Size          | 65536                                                                                                                   |

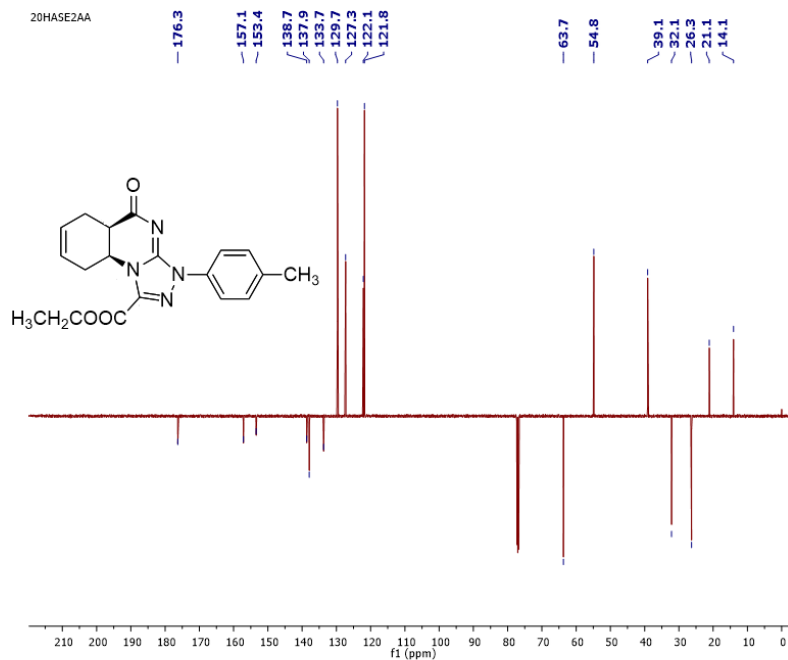

| Parameter                 | Value                                                                                                                   |
|---------------------------|-------------------------------------------------------------------------------------------------------------------------|
| 1 Data File Name          | Ei/ after/ Hungary work/ 19 20HASE/ 20HASE/ E2/ 20HASE2AA-2 020012770749 482-001/ 20HASE2AA/ 11/ pdata/ 1/ 1r 20HASE2AA |
| 2 Title                   | 20HASE2AA                                                                                                               |
| 3 Comment                 |                                                                                                                         |
| 4 Origin                  | Bruker BioSpin                                                                                                          |
| 5 Owner                   | GmbH                                                                                                                    |
| 6 Site                    | nmrsu                                                                                                                   |
| 7 Spectrometer            | CAB AV4 500 MHz BASIC                                                                                                   |
| 8 Author                  |                                                                                                                         |
| 9 Solvent                 | CDCl3                                                                                                                   |
| 10 Temperature            | 298.0                                                                                                                   |
| 11 Pulse Sequence         | jmod                                                                                                                    |
| 12 Number of Scans        | 256                                                                                                                     |
| 13 Receiver Gain          | 101                                                                                                                     |
| 14 Relaxation Delay       | 2.0000                                                                                                                  |
| 15 Pulse Width            | 10.0000                                                                                                                 |
| 16 Acquisition Time       | 1.0879                                                                                                                  |
| 17 Acquisition Date       | 2020-01-24T18:59:10                                                                                                     |
| 18 Modification Date      | 2020-01-27T00:15:14                                                                                                     |
| 19 Spectrometer Frequency | 125.78                                                                                                                  |
| 20 Spectral Width         | 30120.5                                                                                                                 |
| 21 Lowest Frequency       | -2482.7                                                                                                                 |
| 22 Nucleus                | 13C                                                                                                                     |
| 23 Acquired Size          | 32768                                                                                                                   |
| 24 Spectral Size          | 32768                                                                                                                   |

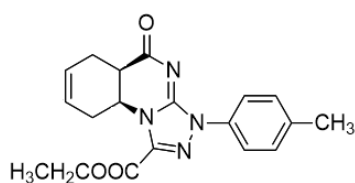

## COSY Experiments

| H-H Correlation |          |
|-----------------|----------|
| f1 (ppm)        | f2 (ppm) |
| 2.78            | 2.32     |
| 3.28            | 2.29     |
| 4.51            | 1.46     |
| 5.88            | 5.63     |
| 7.89            | 7.25     |

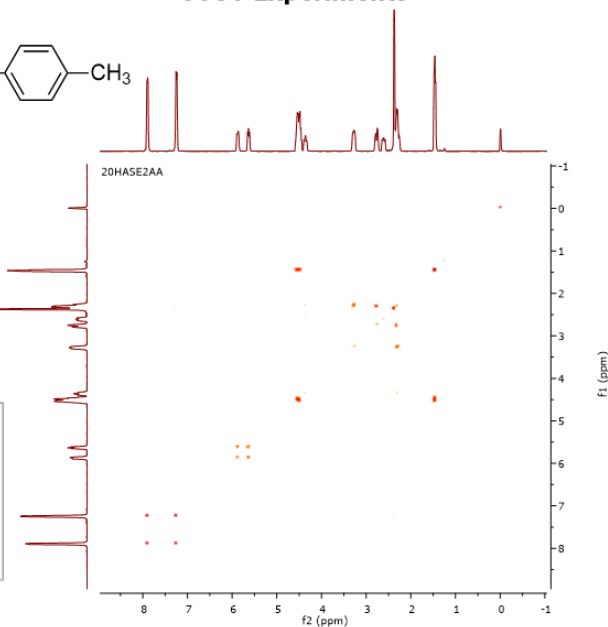

| Parameter                 | Value (f2, f1)                                                                                                 |
|---------------------------|----------------------------------------------------------------------------------------------------------------|
| 1 Data File Name          | E:/ after/ Hungary work/ 19 20HASE/ 20HASE/ E2/ 20HASE2AA-20 200127707494 82-001/ 20HASE2AA/ 12/ pdata/ 1/ 2rr |
| 2 Title                   | 20HASE2AA                                                                                                      |
| 3 Comment                 |                                                                                                                |
| 4 Origin                  | Bruker BioSpin GmbH                                                                                            |
| 5 Owner                   | nmrsu                                                                                                          |
| 6 Site                    |                                                                                                                |
| 7 Spectrometer            | CAB AV4 500 MHz BASIC                                                                                          |
| 8 Author                  |                                                                                                                |
| 9 Solvent                 | CDCl3                                                                                                          |
| 10 Temperature            | 298.0                                                                                                          |
| 11 Pulse Sequence         | cosygpppqf                                                                                                     |
| 12 Number of Scans        | 1                                                                                                              |
| 13 Receiver Gain          | 101                                                                                                            |
| 14 Relaxation Delay       | 1.9488                                                                                                         |
| 15 Pulse Width            | 10.8400                                                                                                        |
| 16 Acquisition Time       | 0.2048                                                                                                         |
| 17 Acquisition Date       | 2020-01-24T19:05:00                                                                                            |
| 18 Modification Date      | 2020-01-27T00:15:20                                                                                            |
| 19 Spectrometer Frequency | (500.20, 500.20)                                                                                               |
| 20 Spectral Width         | (5000.0, 5000.0)                                                                                               |
| 21 Lowest Frequency       | (-520.2, -520.2)                                                                                               |
| 22 Nucleus                | (1H, 1H)                                                                                                       |
| 23 Acquired Size          | (1024, 128)                                                                                                    |
| 24 Spectral Size          | (1024, 1024)                                                                                                   |

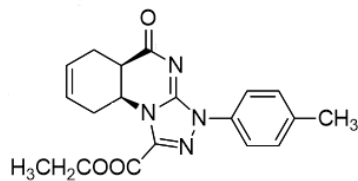

## TOCSY Experiments

| H-H Correlation |          |
|-----------------|----------|
| f1 (ppm)        | f2 (ppm) |
| 4.36            | 3.27     |
| 4.36            | 2.76     |
| 4.36            | 2.60     |
| 4.36            | 2.32     |
| 4.51            | 1.46     |
| 4.53            | 1.46     |
| 5.63            | 4.36     |
| 5.63            | 3.28     |
| 5.63            | 2.32     |
| 5.63            | 2.60     |
| 5.63            | 2.76     |
| 5.88            | 5.63     |
| 5.88            | 4.36     |
| 5.88            | 2.29     |
| 5.88            | 2.61     |
| 5.88            | 2.77     |
| 5.88            | 3.27     |
| 7.89            | 7.25     |

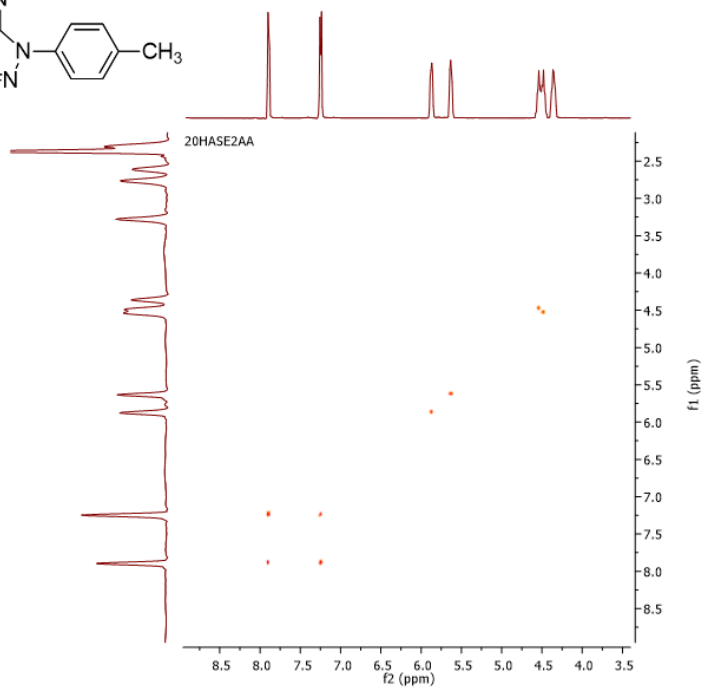

| Parameter                 | Value (f2, f1)                                                                                                 |
|---------------------------|----------------------------------------------------------------------------------------------------------------|
| 1 Data File Name          | E:/ after/ Hungary work/ 19 20HASE/ 20HASE/ E2/ 20HASE2AA-20 200127707494 82-001/ 20HASE2AA/ 14/ pdata/ 1/ 2rr |
| 2 Title                   | 20HASE2AA                                                                                                      |
| 3 Comment                 |                                                                                                                |
| 4 Origin                  | Bruker BioSpin GmbH                                                                                            |
| 5 Owner                   | nmrsu                                                                                                          |
| 6 Site                    |                                                                                                                |
| 7 Spectrometer            | CAB AV4 500 MHz BASIC                                                                                          |
| 8 Author                  |                                                                                                                |
| 9 Solvent                 | CDCl3                                                                                                          |
| 10 Temperature            | 298.0                                                                                                          |
| 11 Pulse Sequence         | mlevphpp                                                                                                       |
| 12 Number of Scans        | 8                                                                                                              |
| 13 Receiver Gain          | 101                                                                                                            |
| 14 Relaxation Delay       | 1.9980                                                                                                         |
| 15 Pulse Width            | 10.8400                                                                                                        |
| 16 Acquisition Time       | 0.2048                                                                                                         |
| 17 Acquisition Date       | 2020-01-24T21:11:06                                                                                            |
| 18 Modification Date      | 2020-01-27T00:15:32                                                                                            |
| 19 Spectrometer Frequency | (500.20, 500.20)                                                                                               |
| 20 Spectral Width         | (5000.0, 5000.0)                                                                                               |
| 21 Lowest Frequency       | (-520.2, -520.2)                                                                                               |
| 22 Nucleus                | (1H, 1H)                                                                                                       |
| 23 Acquired Size          | (1024, 256)                                                                                                    |
| 24 Spectral Size          | (1024, 1024)                                                                                                   |

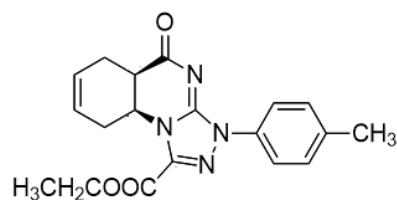

## HSQC Experiments

### C-H Correlation

| f1 (ppm) | f2 (ppm) |
|----------|----------|
| 13.95    | 1.46     |
| 20.89    | 2.37     |
| 26.21    | 2.77     |
| 26.21    | 2.33     |
| 32.02    | 2.29     |
| 32.03    | 3.29     |
| 38.95    | 2.61     |
| 54.76    | 4.35     |
| 63.63    | 4.48     |
| 121.85   | 7.89     |
| 122.01   | 5.63     |
| 127.18   | 5.87     |
| 129.76   | 7.25     |

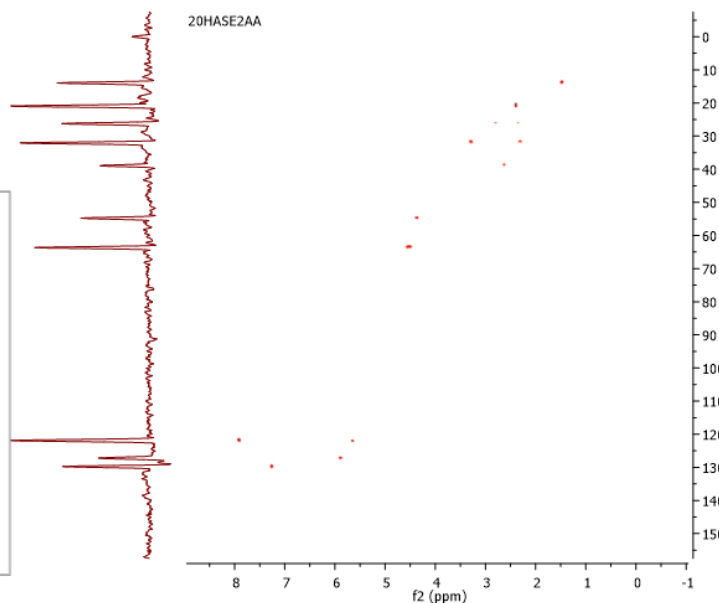

| Parameter                 | Value (f2, f1)                                                                                                 |
|---------------------------|----------------------------------------------------------------------------------------------------------------|
| 1 Data File Name          | E:/ after/ Hungary work/ 19 20HASE/ 20HASE/ E2/ 20HASE2AA-20 200127T074948 Z-001/ 20HASE2AA/ 15/ pdata/ 1/ Zrr |
| 2 Title                   | 20HASE2AA                                                                                                      |
| 3 Comment                 |                                                                                                                |
| 4 Origin                  | Bruker BioSpin GmbH                                                                                            |
| 5 Owner                   | nmrsu                                                                                                          |
| 6 Site                    |                                                                                                                |
| 7 Spectrometer            | CAB AV4 500 MHZ BASIC                                                                                          |
| 8 Author                  |                                                                                                                |
| 9 Solvent                 | CDCl3                                                                                                          |
| 10 Temperature            | 298.0                                                                                                          |
| 11 Pulse Sequence         | hscqetgp                                                                                                       |
| 12 Number of Scans        | 2                                                                                                              |
| 13 Receiver Gain          | 101                                                                                                            |
| 14 Relaxation Delay       | 1.5000                                                                                                         |
| 15 Pulse Width            | 10.8400                                                                                                        |
| 16 Acquisition Time       | 0.1024                                                                                                         |
| 17 Acquisition Date       | 2020-01-24T21:26:01                                                                                            |
| 18 Modification Date      | 2020-01-27T00:15:38                                                                                            |
| 19 Spectrometer Frequency | (500.20, 125.78)                                                                                               |
| 20 Spectral Width         | (5000.0, 20752.3)                                                                                              |
| 21 Lowest Frequency       | (-520.2, -943.0)                                                                                               |
| 22 Nucleus                | (1H, 13C)                                                                                                      |
| 23 Acquired Size          | (512, 256)                                                                                                     |
| 24 Spectral Size          | (1024, 1024)                                                                                                   |

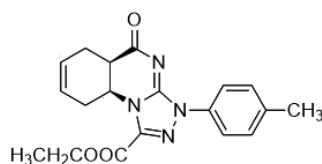

## HMBC Experiments

### C-H9a Correlation

| f1 (ppm) | f2 (ppm) |
|----------|----------|
| 26.24    | 4.35     |
| 31.78    | 4.36     |
| 38.70    | 4.36     |
| 61.12    | 4.37     |
| 153.31   | 4.36     |
| 176.19   | 4.36     |

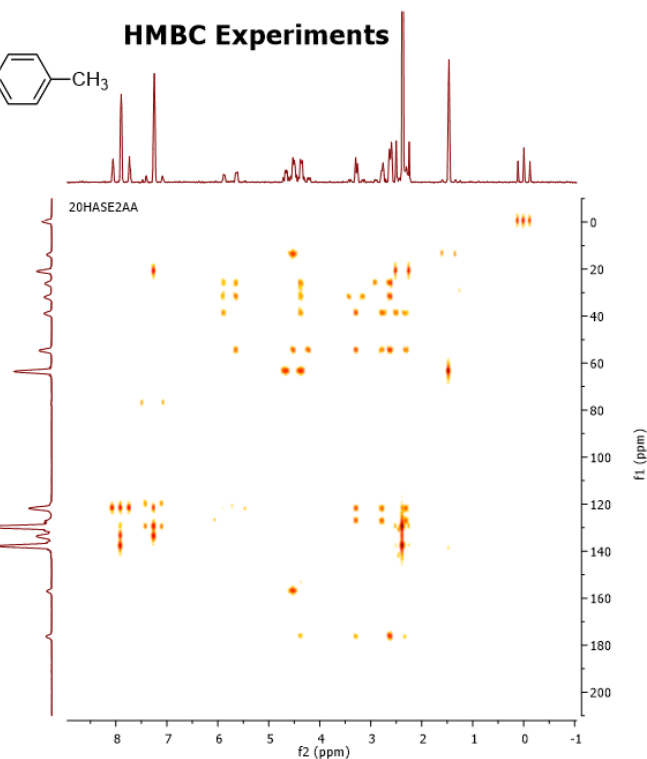

| Parameter                 | Value (f2, f1)                                                                                                 |
|---------------------------|----------------------------------------------------------------------------------------------------------------|
| 1 Data File Name          | E:/ after/ Hungary work/ 19 20HASE/ 20HASE/ E2/ 20HASE2AA-20 200127T074948 Z-001/ 20HASE2AA/ 16/ pdata/ 1/ Zrr |
| 2 Title                   | 20HASE2AA                                                                                                      |
| 3 Comment                 |                                                                                                                |
| 4 Origin                  | Bruker BioSpin GmbH                                                                                            |
| 5 Owner                   | nmrsu                                                                                                          |
| 6 Site                    |                                                                                                                |
| 7 Spectrometer            | CAB AV4 500 MHZ BASIC                                                                                          |
| 8 Author                  |                                                                                                                |
| 9 Solvent                 | CDCl3                                                                                                          |
| 10 Temperature            | 298.0                                                                                                          |
| 11 Pulse Sequence         | hmbcgpndqf                                                                                                     |
| 12 Number of Scans        | 8                                                                                                              |
| 13 Receiver Gain          | 101                                                                                                            |
| 14 Relaxation Delay       | 1.5000                                                                                                         |
| 15 Pulse Width            | 10.8400                                                                                                        |
| 16 Acquisition Time       | 0.2048                                                                                                         |
| 17 Acquisition Date       | 2020-01-24T21:57:30                                                                                            |
| 18 Modification Date      | 2020-01-27T00:15:44                                                                                            |
| 19 Spectrometer Frequency | (500.20, 125.78)                                                                                               |
| 20 Spectral Width         | (5000.0, 27672.1)                                                                                              |
| 21 Lowest Frequency       | (-520.2, -1258.5)                                                                                              |
| 22 Nucleus                | (1H, 13C)                                                                                                      |
| 23 Acquired Size          | (1024, 128)                                                                                                    |
| 24 Spectral Size          | (2048, 1024)                                                                                                   |



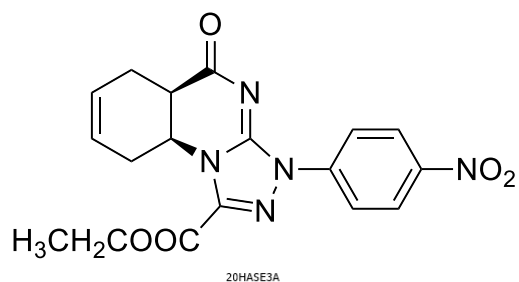

(4aS\*,8aR\*)-Ethyl 9-oxo-1-(4-nitrophenyl)-1,4a,5,8,8a,9-hexahydro-[1,2,4]triazolo[4,3-a]quinazoline-3-carboxylate (4c)

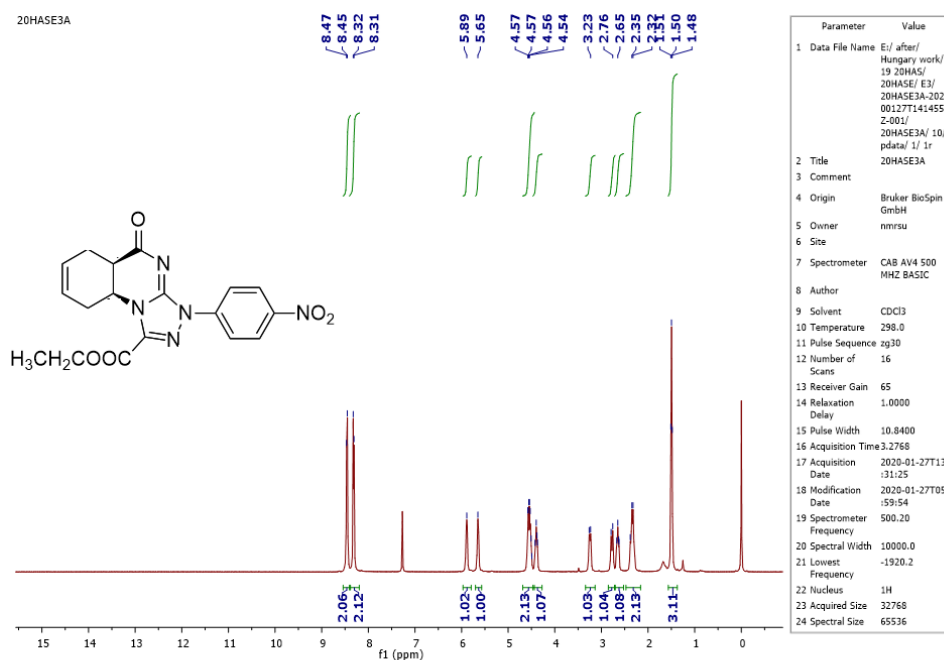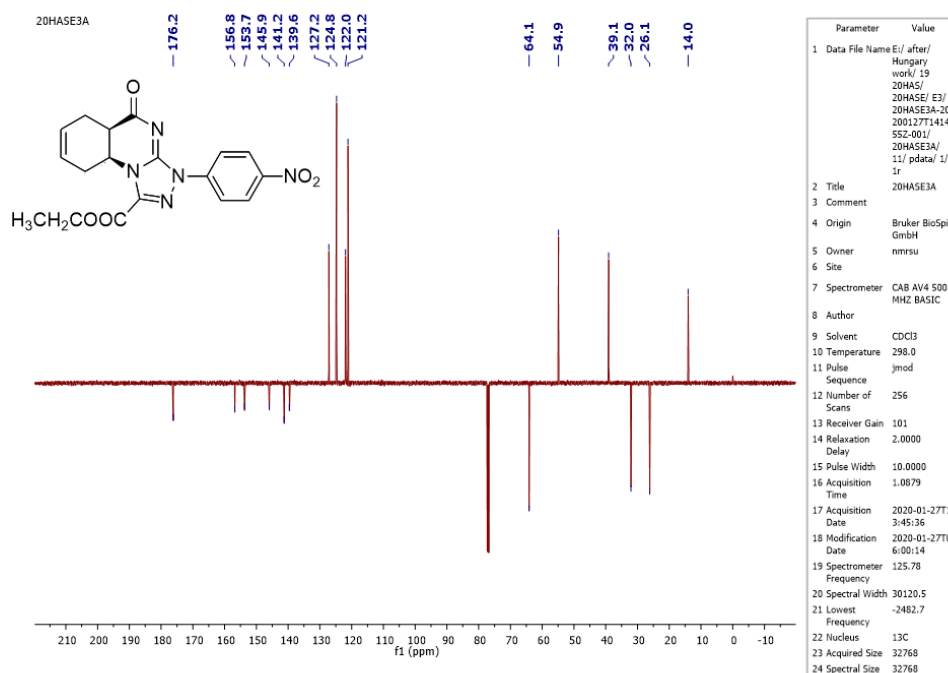

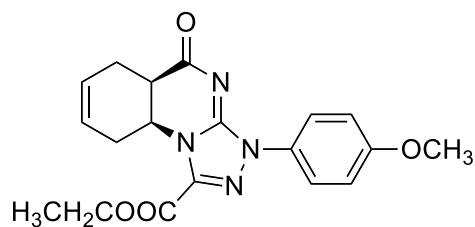

(4a*S*\*,8a*R*\*)-Ethyl 9-oxo-1-(4-methoxyphenyl)-1,4a,5,8,8a,9-hexahydro[1,2,4]triazolo-[4,3-*a*]quinazoline-3-carboxylate  
(4d)

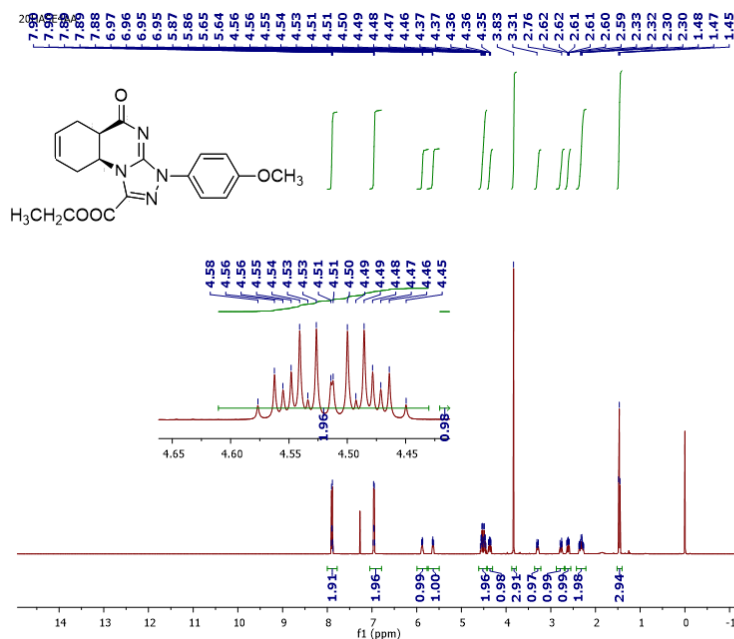

| Parameter                 | Value                                                                                                         |
|---------------------------|---------------------------------------------------------------------------------------------------------------|
| 1 Data File Name          | Ei/ after/ Hungary work/ 19 20HASE/ 20HASE/ E4/ 20HASE4AA-20 200129T12191 42-001/ 20HASE4AA/ 10/ pdata/ 1/ 1r |
| 2 Title                   | 20HASE4AA                                                                                                     |
| 3 Comment                 |                                                                                                               |
| 4 Origin                  | Bruker BioSpin GmbH                                                                                           |
| 5 Owner                   | nmrsu                                                                                                         |
| 6 Site                    |                                                                                                               |
| 7 Spectrometer            | CAB AV4 500 MHz BASIC                                                                                         |
| 8 Author                  |                                                                                                               |
| 9 Solvent                 | CDCl <sub>3</sub>                                                                                             |
| 10 Temperature            | 298.0                                                                                                         |
| 11 Pulse Sequence         | zg30                                                                                                          |
| 12 Number of Scans        | 16                                                                                                            |
| 13 Receiver Gain          | 83                                                                                                            |
| 14 Relaxation Delay       | 1.0000                                                                                                        |
| 15 Pulse Width            | 10.8400                                                                                                       |
| 16 Acquisition Time       | 3.2768                                                                                                        |
| 17 Acquisition Date       | 2020-01-28T15:36:37                                                                                           |
| 18 Modification Date      | 2020-01-29T03:31:04                                                                                           |
| 19 Spectrometer Frequency | 500.20                                                                                                        |
| 20 Spectral Width         | 10000.0                                                                                                       |
| 21 Lowest Frequency       | -1919.3                                                                                                       |
| 22 Nucleus                | <sup>1</sup> H                                                                                                |
| 23 Acquired Size          | 32768                                                                                                         |
| 24 Spectral Size          | 65536                                                                                                         |

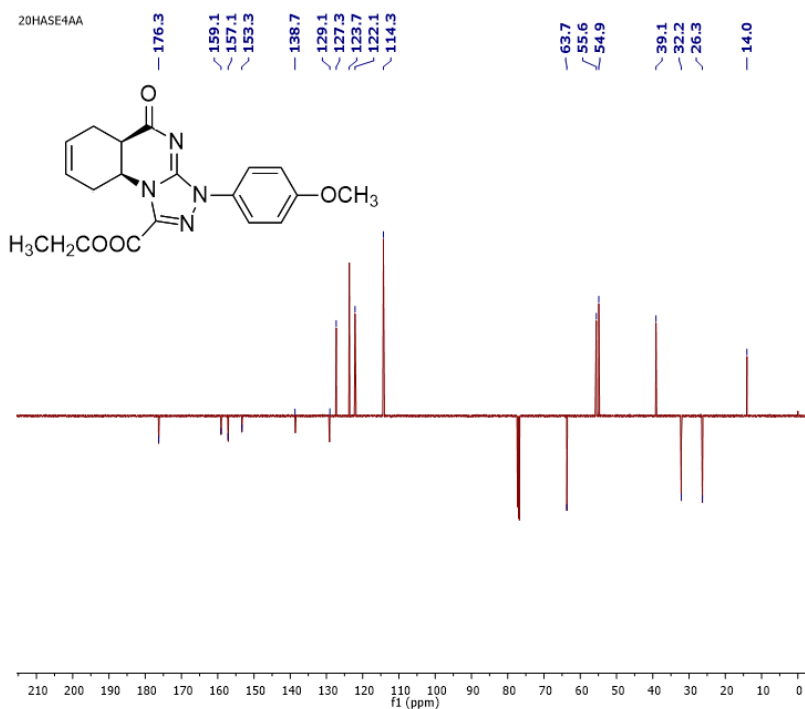

| Parameter                 | Value                                                                                                         |
|---------------------------|---------------------------------------------------------------------------------------------------------------|
| 1 Data File Name          | Ei/ after/ Hungary work/ 19 20HASE/ 20HASE/ E4/ 20HASE4AA-20 200129T12191 42-001/ 20HASE4AA/ 11/ pdata/ 1/ 1r |
| 2 Title                   | 20HASE4AA                                                                                                     |
| 3 Comment                 |                                                                                                               |
| 4 Origin                  | Bruker BioSpin GmbH                                                                                           |
| 5 Owner                   | nmrsu                                                                                                         |
| 6 Site                    |                                                                                                               |
| 7 Spectrometer            | CAB AV4 500 MHz BASIC                                                                                         |
| 8 Author                  |                                                                                                               |
| 9 Solvent                 | CDCl <sub>3</sub>                                                                                             |
| 10 Temperature            | 298.0                                                                                                         |
| 11 Pulse Sequence         | jmod                                                                                                          |
| 12 Number of Scans        | 256                                                                                                           |
| 13 Receiver Gain          | 101                                                                                                           |
| 14 Relaxation Delay       | 2.0000                                                                                                        |
| 15 Pulse Width            | 10.0000                                                                                                       |
| 16 Acquisition Time       | 1.0879                                                                                                        |
| 17 Acquisition Date       | 2020-01-28T15:50:47                                                                                           |
| 18 Modification Date      | 2020-01-29T03:29:24                                                                                           |
| 19 Spectrometer Frequency | 125.78                                                                                                        |
| 20 Spectral Width         | 30120.5                                                                                                       |
| 21 Lowest Frequency       | -2482.7                                                                                                       |
| 22 Nucleus                | <sup>13</sup> C                                                                                               |
| 23 Acquired Size          | 32768                                                                                                         |
| 24 Spectral Size          | 32768                                                                                                         |

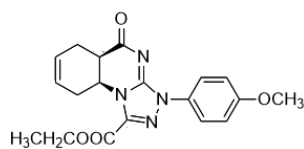

## COSY Experiments

| H-H correlation |          |
|-----------------|----------|
| f1 (ppm)        | f2 (ppm) |
| 2.61            | 2.32     |
| 2.77            | 2.60     |
| 2.77            | 2.34     |
| 3.29            | 2.29     |
| 4.35            | 3.29     |
| 4.36            | 2.30     |
| 4.36            | 2.61     |
| 4.51            | 1.46     |
| 5.63            | 3.29     |
| 5.86            | 2.28     |
| 5.88            | 2.77     |
| 5.88            | 5.63     |
| 7.90            | 6.95     |

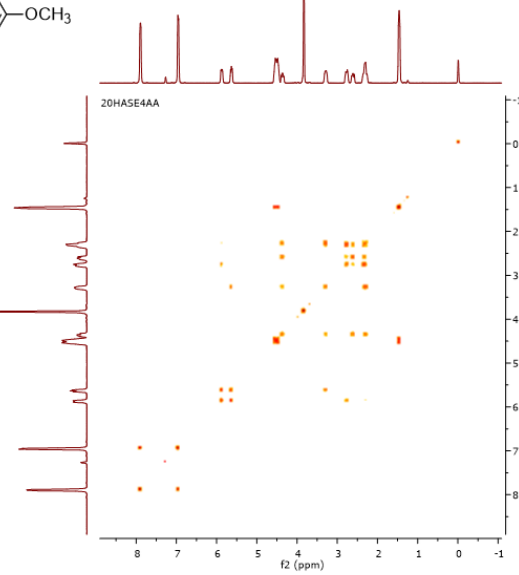

| Parameter                 | Value (f2, f1)                                                                                                 |
|---------------------------|----------------------------------------------------------------------------------------------------------------|
| 1 Data File Name          | E:/ after/ Hungary work/ 19 20HASE/ 20HASE/ E4/ 20HASE4AA-2 0200129T1219 14Z-001/ 20HASE4AA/ 13/ pdata/ 1/ 2tr |
| 2 Title                   | 20HASE4AA                                                                                                      |
| 3 Comment                 |                                                                                                                |
| 4 Origin                  | Bruker BioSpin GmbH                                                                                            |
| 5 Owner                   | nmrsu                                                                                                          |
| 6 Site                    |                                                                                                                |
| 7 Spectrometer            | CAB AV4 500 MHZ BASIC                                                                                          |
| 8 Author                  |                                                                                                                |
| 9 Solvent                 | CDCl3                                                                                                          |
| 10 Temperature            | 298.0                                                                                                          |
| 11 Pulse Sequence         | cosypppqf                                                                                                      |
| 12 Number of Scans        | 1                                                                                                              |
| 13 Receiver Gain          | 101                                                                                                            |
| 14 Relaxation Delay       | 1.9508                                                                                                         |
| 15 Pulse Width            | 10.8400                                                                                                        |
| 16 Acquisition Time       | 0.2048                                                                                                         |
| 17 Acquisition Date       | 2020-01-28T1 5:56:36                                                                                           |
| 18 Modification Date      | 2020-01-29T0 3:29:34                                                                                           |
| 19 Spectrometer Frequency | (500.20, 500.20)                                                                                               |
| 20 Spectral Width         | (5000.0, 5000.0)                                                                                               |
| 21 Lowest Frequency       | (-544.7, -544.7)                                                                                               |
| 22 Nucleus                | (1H, 1H)                                                                                                       |
| 23 Acquired Size          | (1024, 128)                                                                                                    |
| 24 Spectral Size          | (1024, 1024)                                                                                                   |

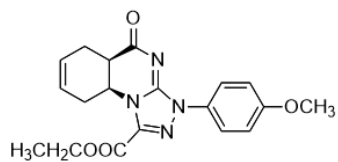

## TOCSY Experiments

| f1 (ppm) | f2 (ppm) |
|----------|----------|
| 2.61     | 2.31     |
| 2.77     | 2.32     |
| 3.26     | 2.29     |
| 3.29     | 2.32     |
| 3.29     | 2.60     |
| 3.29     | 2.76     |
| 4.36     | 3.28     |
| 4.36     | 2.32     |
| 4.36     | 2.77     |
| 4.37     | 2.59     |
| 4.52     | 1.46     |
| 5.63     | 2.32     |
| 5.63     | 2.61     |
| 5.63     | 2.77     |
| 5.63     | 3.29     |
| 5.88     | 3.28     |
| 5.88     | 2.77     |
| 5.88     | 2.60     |
| 5.88     | 2.30     |
| 6.96     | 7.89     |
| 7.89     | 6.95     |

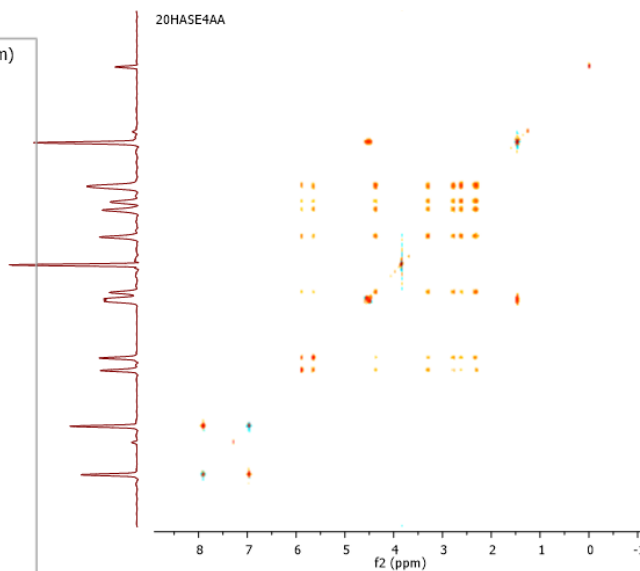

| Parameter                 | Value (f2, f1)                                                                                                 |
|---------------------------|----------------------------------------------------------------------------------------------------------------|
| 1 Data File Name          | E:/ after/ Hungary work/ 19 20HASE/ 20HASE/ E4/ 20HASE4AA-20 200129T12191 4Z-001/ 20HASE4AA/ 14/ pdata/ 1/ 2tr |
| 2 Title                   | 20HASE4AA                                                                                                      |
| 3 Comment                 |                                                                                                                |
| 4 Origin                  | Bruker BioSpin GmbH                                                                                            |
| 5 Owner                   | nmrsu                                                                                                          |
| 6 Site                    |                                                                                                                |
| 7 Spectrometer            | CAB AV4 500 MHZ BASIC                                                                                          |
| 8 Author                  |                                                                                                                |
| 9 Solvent                 | CDCl3                                                                                                          |
| 10 Temperature            | 298.0                                                                                                          |
| 11 Pulse Sequence         | mlevphpp                                                                                                       |
| 12 Number of Scans        | 8                                                                                                              |
| 13 Receiver Gain          | 101                                                                                                            |
| 14 Relaxation Delay       | 2.0000                                                                                                         |
| 15 Pulse Width            | 10.8400                                                                                                        |
| 16 Acquisition Time       | 0.2048                                                                                                         |
| 17 Acquisition Date       | 2020-01-28T18 :02:47                                                                                           |
| 18 Modification Date      | 2020-01-29T03 :31:22                                                                                           |
| 19 Spectrometer Frequency | (500.20, 500.20)                                                                                               |
| 20 Spectral Width         | (5000.0, 5000.0)                                                                                               |
| 21 Lowest Frequency       | (-544.7, -544.7)                                                                                               |
| 22 Nucleus                | (1H, 1H)                                                                                                       |
| 23 Acquired Size          | (1024, 256)                                                                                                    |
| 24 Spectral Size          | (1024, 1024)                                                                                                   |

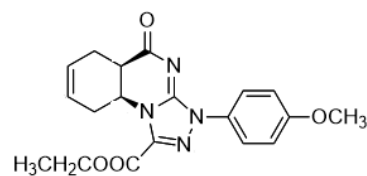

## HSQC Experiments

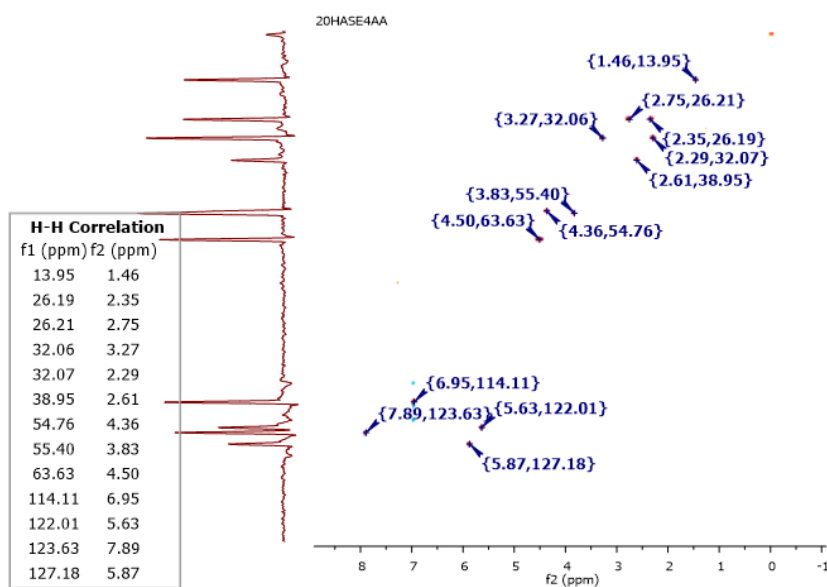

| Parameter                 | Value (f2, f1)                                                                                                 |
|---------------------------|----------------------------------------------------------------------------------------------------------------|
| 1 Data File Name          | E:/ after/ Hungary work/ 19 20HASE/ 20HASE/ E4/ 20HASE4AA-20 200129T121914 2-001/ 20HASE4AA/ 15/ pdata/ 1/ 2rr |
| 2 Title                   | 20HASE4AA                                                                                                      |
| 3 Comment                 |                                                                                                                |
| 4 Origin                  | Brucker BioSpin GmbH                                                                                           |
| 5 Owner                   | nmrsu                                                                                                          |
| 6 Site                    |                                                                                                                |
| 7 Spectrometer            | CAB AV4 500 MHZ BASIC                                                                                          |
| 8 Author                  |                                                                                                                |
| 9 Solvent                 | CDCl3                                                                                                          |
| 10 Temperature            | 298.0                                                                                                          |
| 11 Pulse Sequence         | hsqcetgp                                                                                                       |
| 12 Number of Scans        | 2                                                                                                              |
| 13 Receiver Gain          | 101                                                                                                            |
| 14 Relaxation Delay       | 1.5000                                                                                                         |
| 15 Pulse Width            | 10.8400                                                                                                        |
| 16 Acquisition Time       | 0.1024                                                                                                         |
| 17 Acquisition Date       | 2020-01-28T18:17:44                                                                                            |
| 18 Modification Date      | 2020-01-29T03:32:10                                                                                            |
| 19 Spectrometer Frequency | (500.20, 125.78)                                                                                               |
| 20 Spectral Width         | (5000.0, 20752.3)                                                                                              |
| 21 Lowest Frequency       | (-544.7, -943.0)                                                                                               |
| 22 Nucleus                | (1H, 13C)                                                                                                      |
| 23 Acquired Size          | (512, 256)                                                                                                     |
| 24 Spectral Size          | (1024, 1024)                                                                                                   |

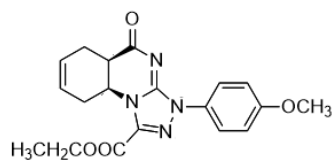

## HMBC Experiments

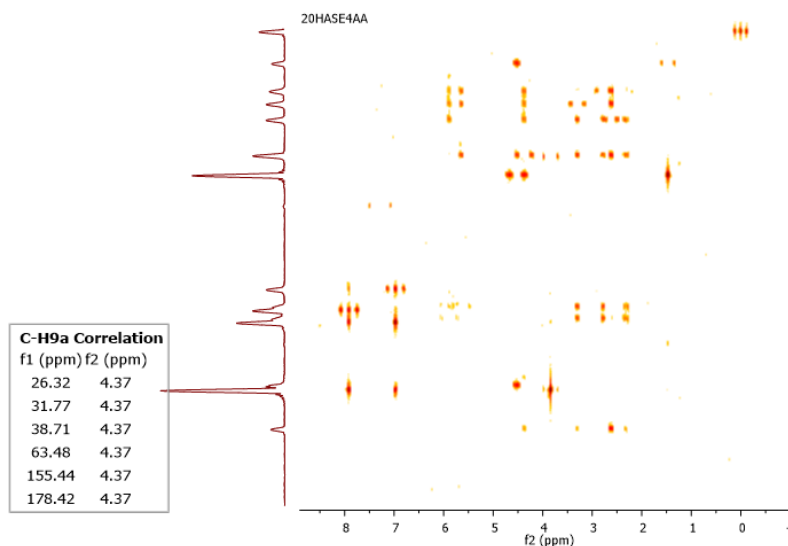

| Parameter                 | Value (f2, f1)                                                                                                 |
|---------------------------|----------------------------------------------------------------------------------------------------------------|
| 1 Data File Name          | E:/ after/ Hungary work/ 19 20HASE/ 20HASE/ E4/ 20HASE4AA-20 200129T121914 2-001/ 20HASE4AA/ 16/ pdata/ 1/ 2rr |
| 2 Title                   | 20HASE4AA                                                                                                      |
| 3 Comment                 |                                                                                                                |
| 4 Origin                  | Brucker BioSpin GmbH                                                                                           |
| 5 Owner                   | nmrsu                                                                                                          |
| 6 Site                    |                                                                                                                |
| 7 Spectrometer            | CAB AV4 500 MHZ BASIC                                                                                          |
| 8 Author                  |                                                                                                                |
| 9 Solvent                 | CDCl3                                                                                                          |
| 10 Temperature            | 298.0                                                                                                          |
| 11 Pulse Sequence         | hmbcpgndqf                                                                                                     |
| 12 Number of Scans        | 8                                                                                                              |
| 13 Receiver Gain          | 101                                                                                                            |
| 14 Relaxation Delay       | 1.5000                                                                                                         |
| 15 Pulse Width            | 10.8400                                                                                                        |
| 16 Acquisition Time       | 0.2048                                                                                                         |
| 17 Acquisition Date       | 2020-01-28T18:49:12                                                                                            |
| 18 Modification Date      | 2020-01-29T03:32:20                                                                                            |
| 19 Spectrometer Frequency | (500.20, 125.78)                                                                                               |
| 20 Spectral Width         | (5000.0, 27672.1)                                                                                              |
| 21 Lowest Frequency       | (-544.7, -1258.5)                                                                                              |
| 22 Nucleus                | (1H, 13C)                                                                                                      |
| 23 Acquired Size          | (1024, 128)                                                                                                    |
| 24 Spectral Size          | (2048, 1024)                                                                                                   |

1,4a,5,8,8a,9-hexahydro[1,2,4]triazolo[4,3-*a*]quinazoline-3-carboxylate (**4e**)

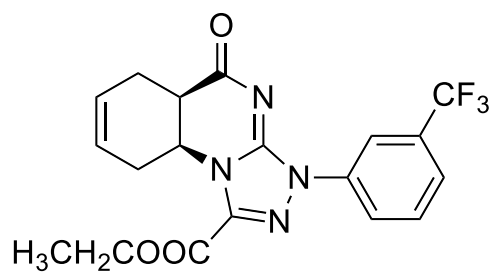

(4a*S*\*,8a*R*\*)-Ethyl

9-oxo-1-(3-(trifluoromethyl)phenyl)-

1,4a,5,8,8a,9-hexahydro[1,2,4]triazolo[4,3-*a*]quinazoline-3-  
carboxylate (**4f**)

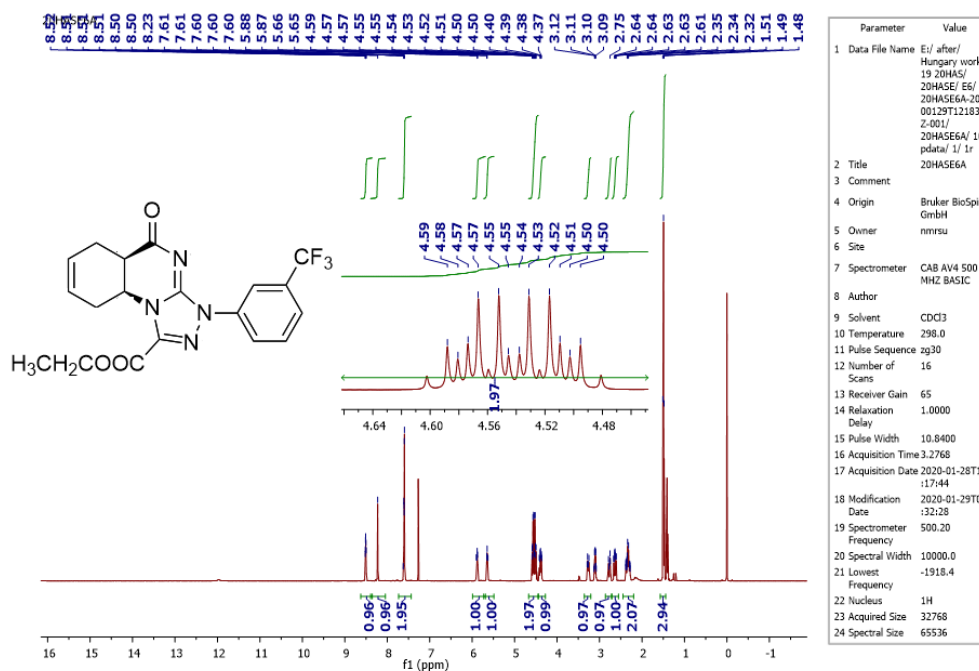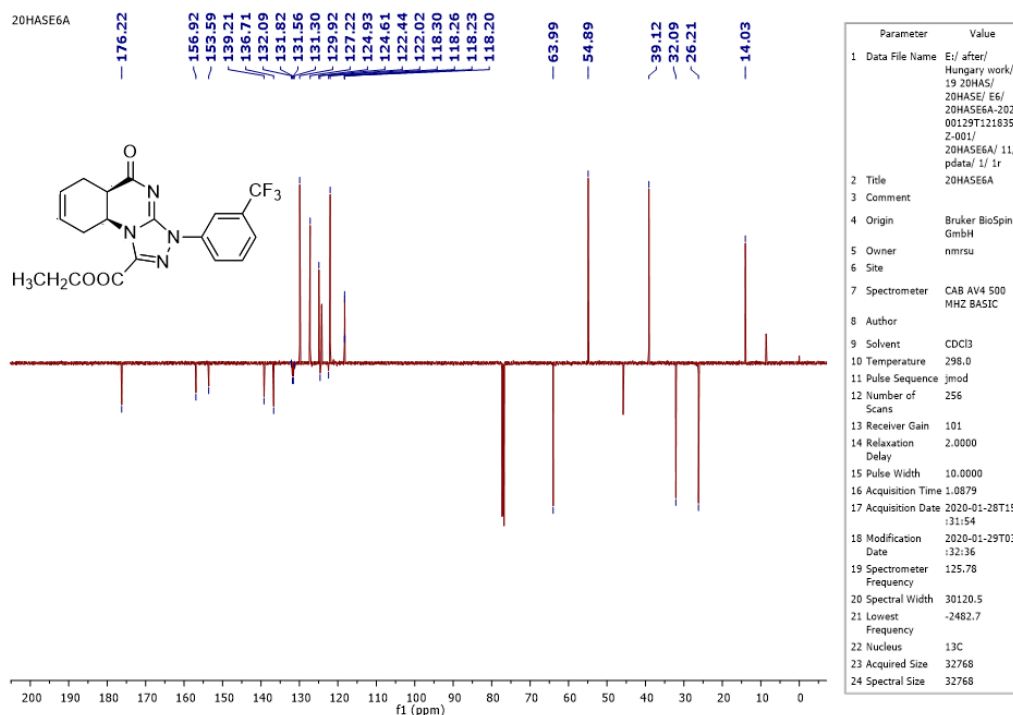

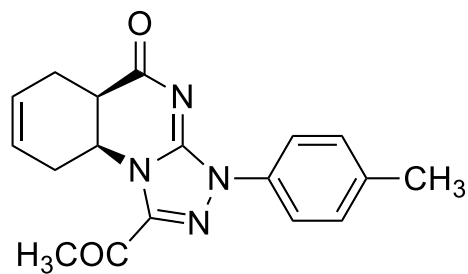

(4aS\*,8aR\*)-3-Acetyl-1-(*p*-tolyl)-4a,5,8,9-tetrahydro[1,2,4]triazolo[4,3-*a*]quinazoline-9(1*H*)-one (**4g**)

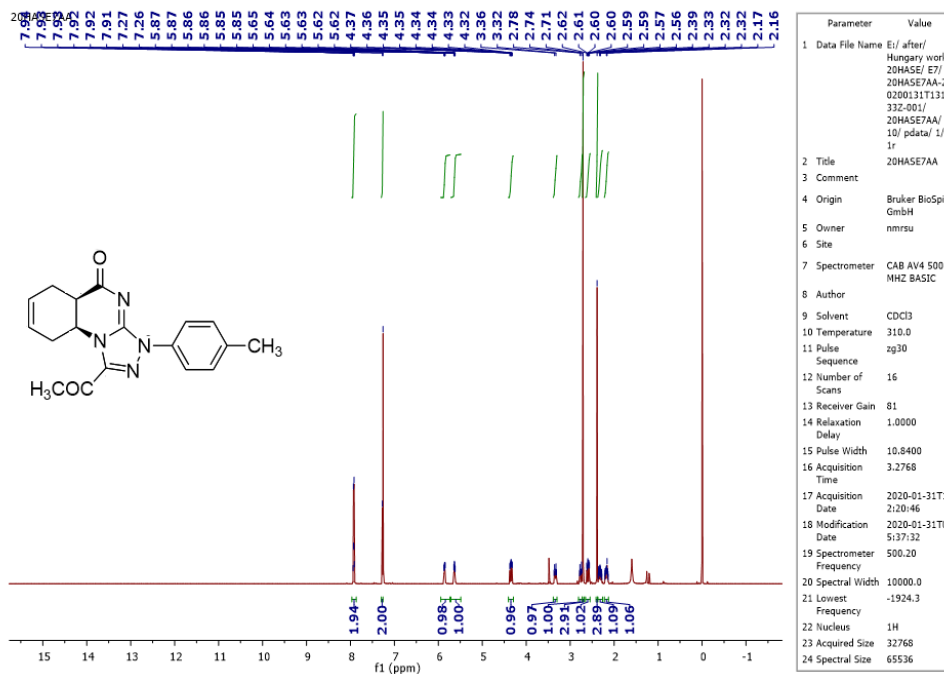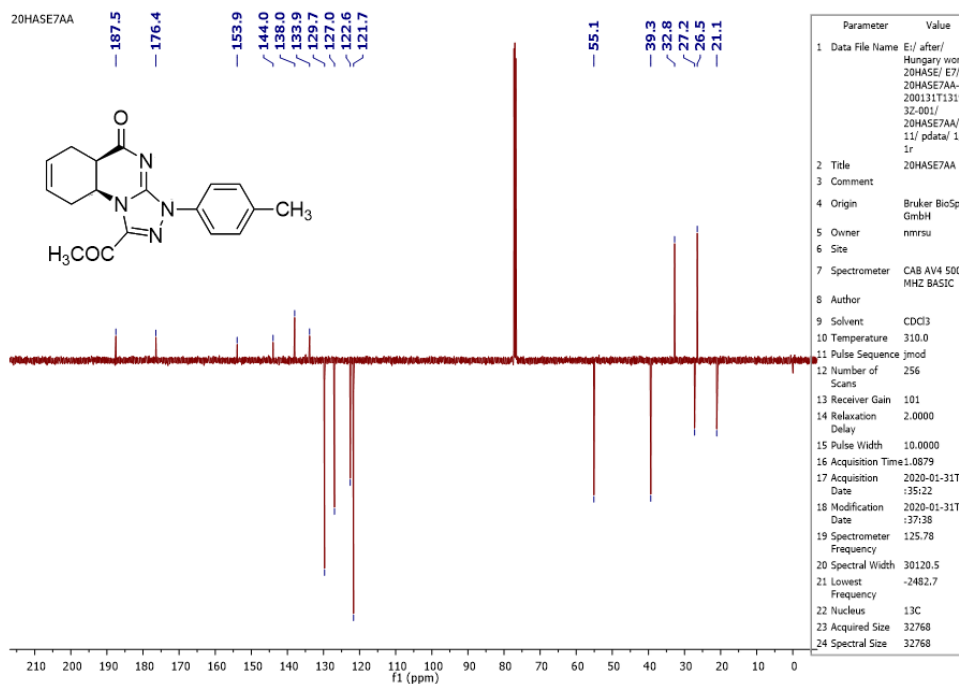

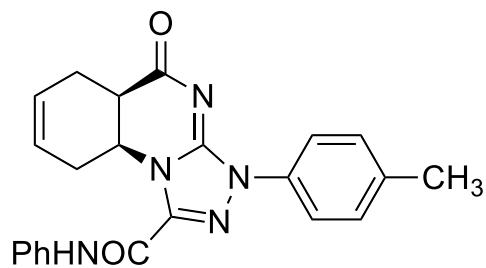

(4aS\*,8aR\*)-9-Oxo-N-Phenyl-1-(p-tolyl)-1,4a,5,8,8a,9-hexahydro[1,2,4]triazolo[4,3-a]quinazoline-3-carboxamide (**4h**)

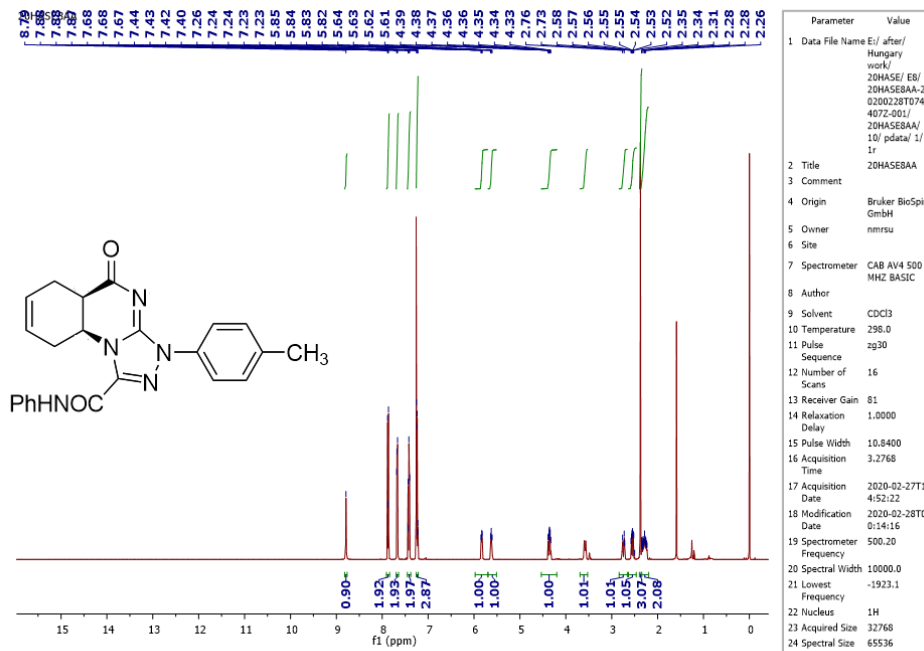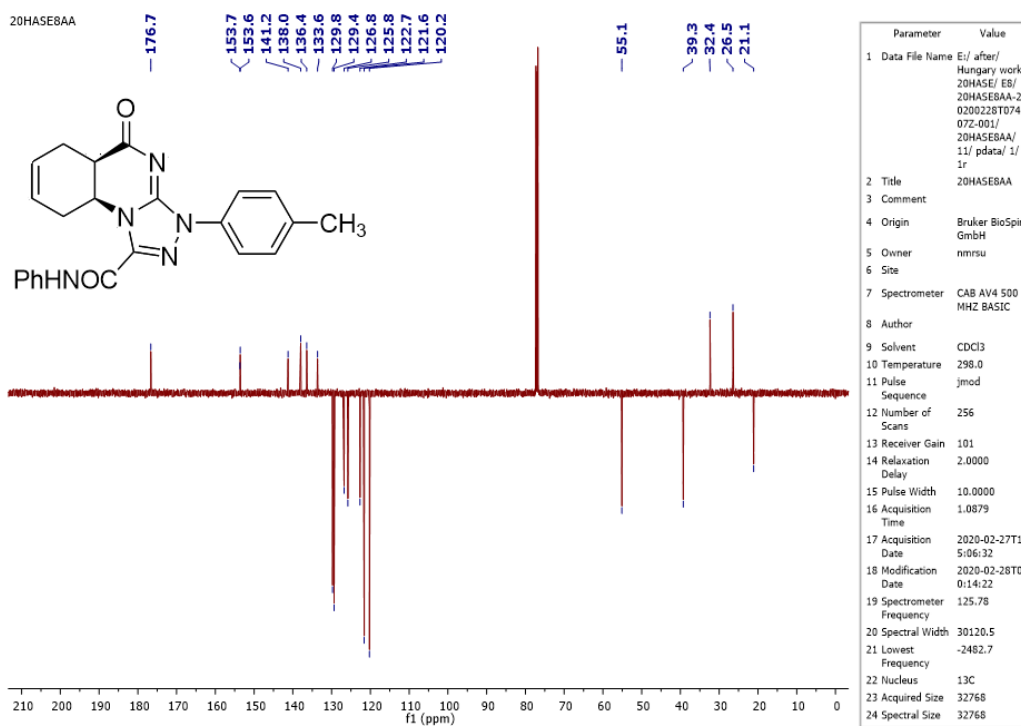



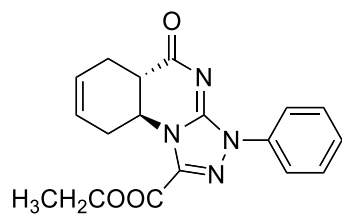

(4aS\*,8aS\*)-Ethyl 9-oxo-1-phenyl-1,4a,5,8,8a,9-hexahydro-[1,2,4]triazolo[4,3-a]quinazoline-3-carboxylate (**5a**)

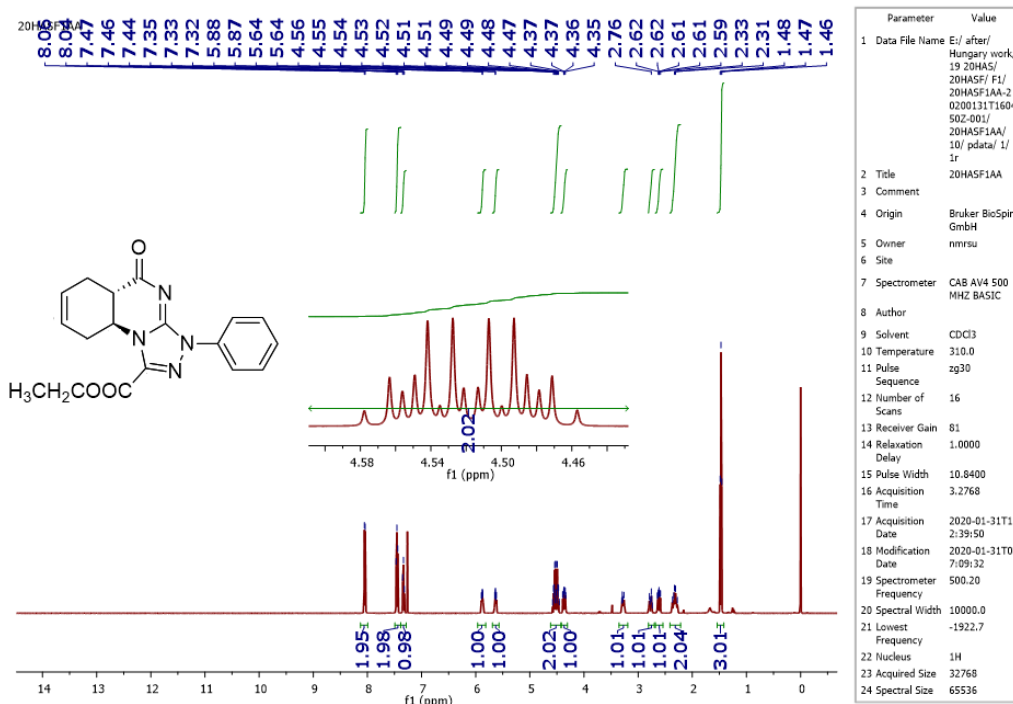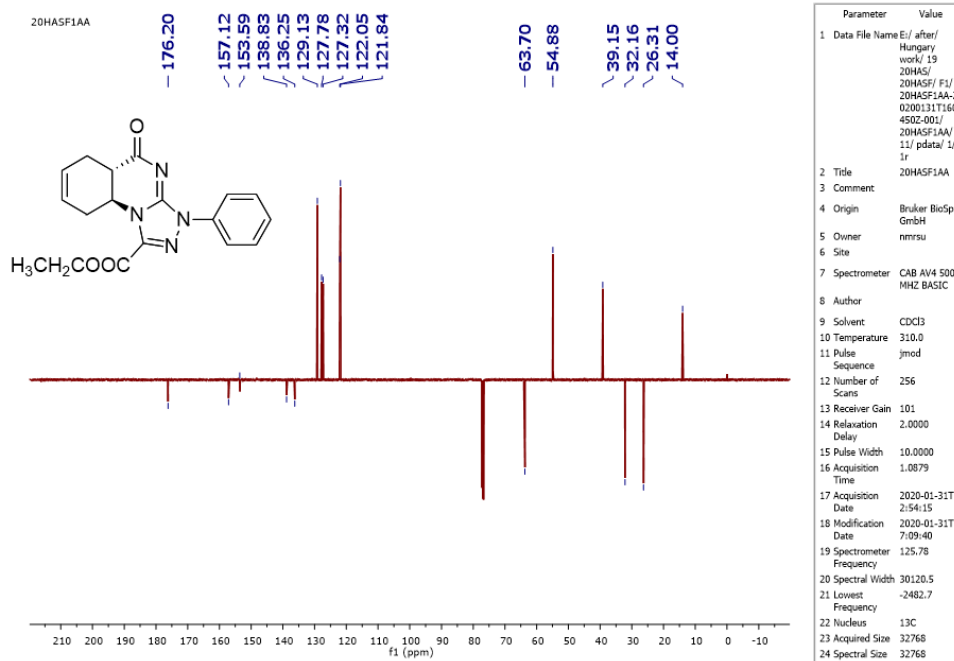

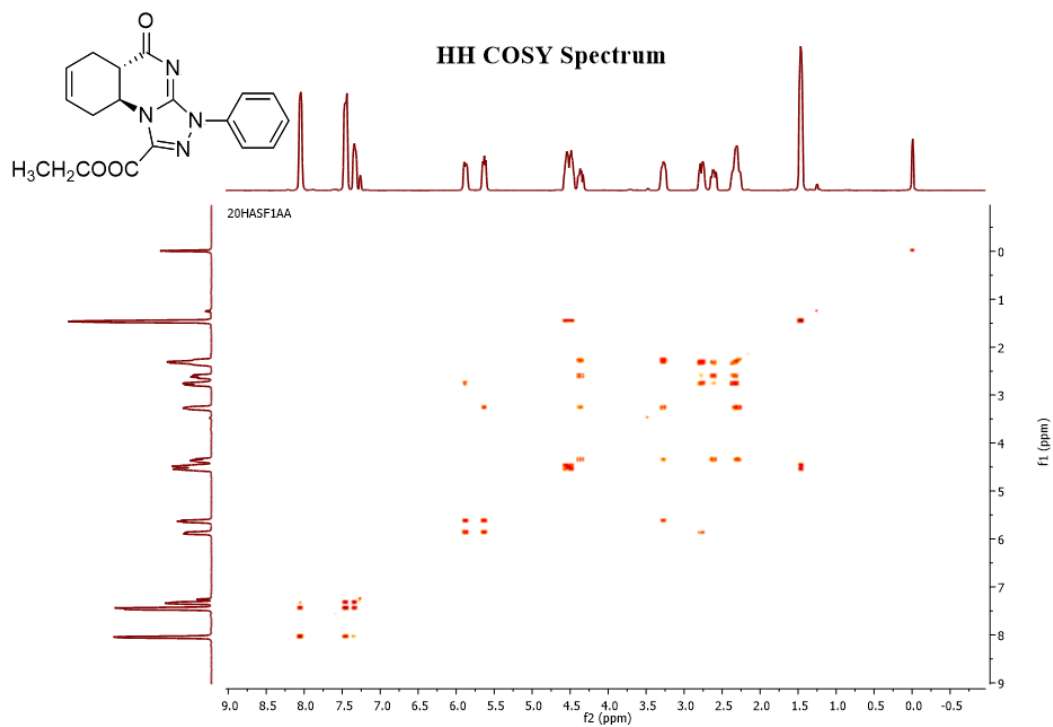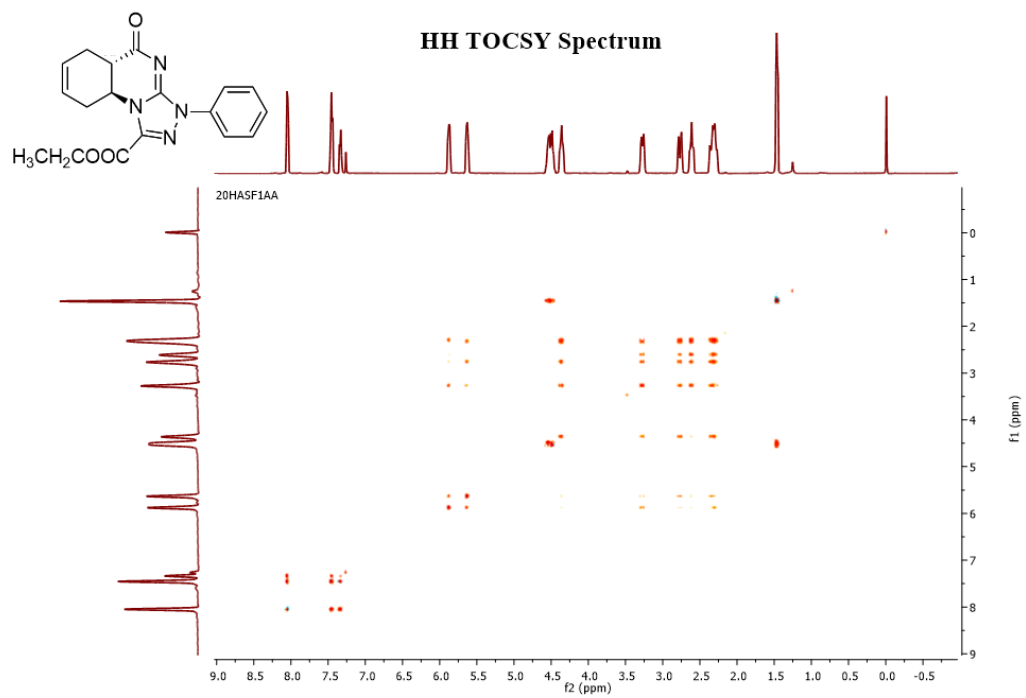

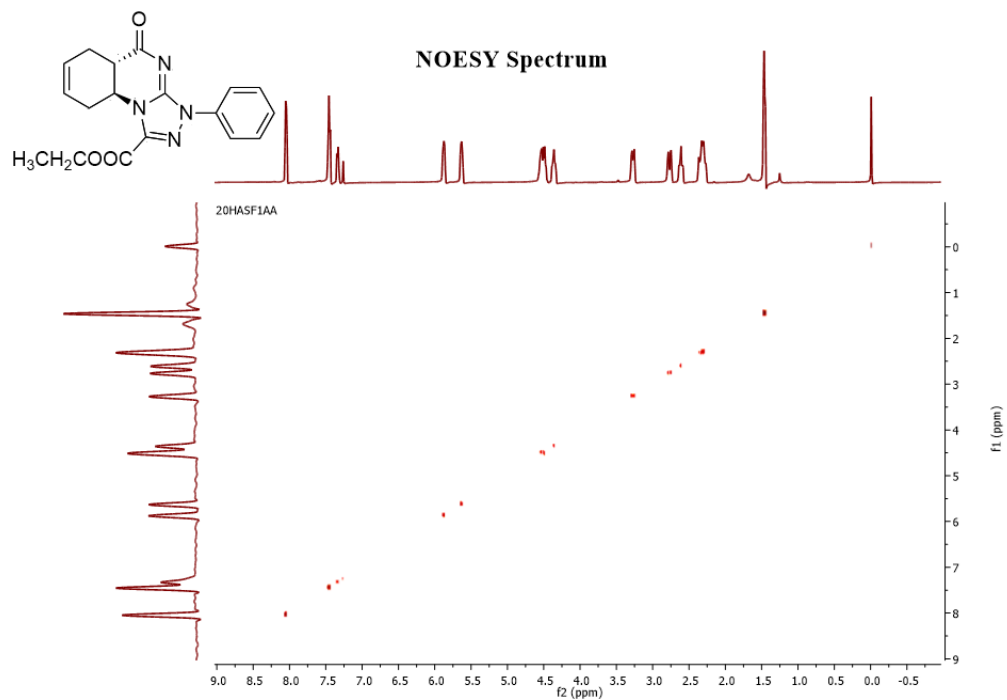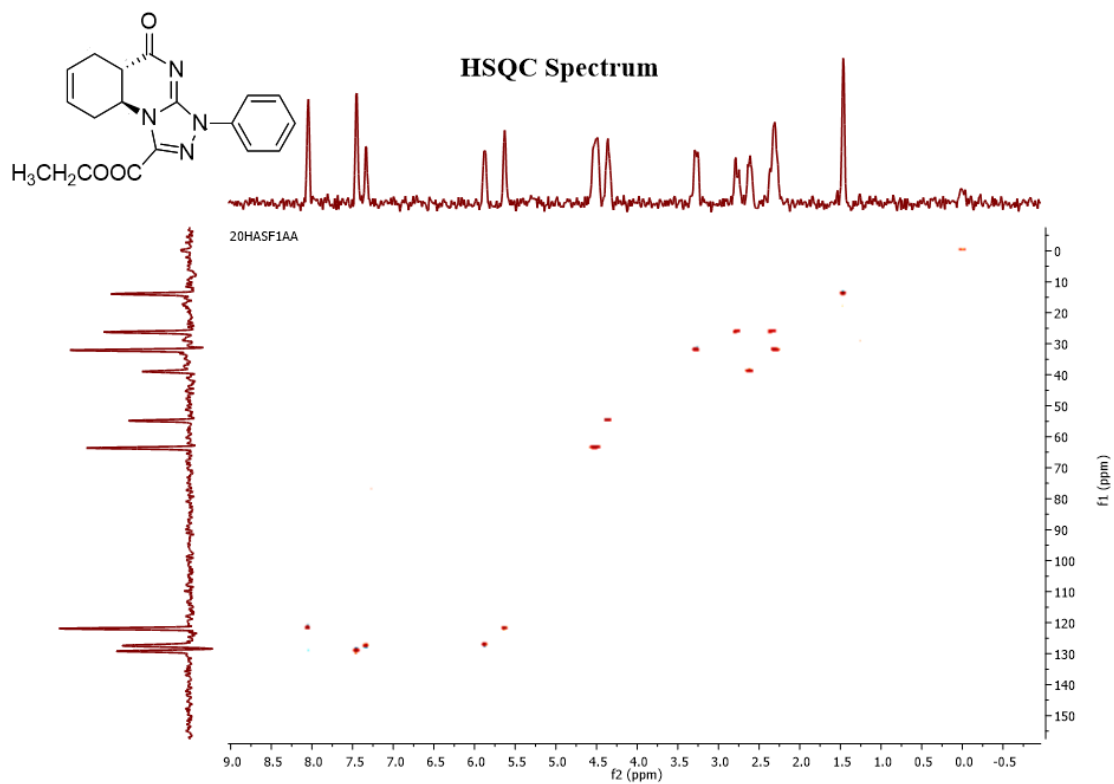

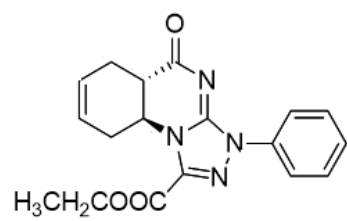

HMBC Spectrum

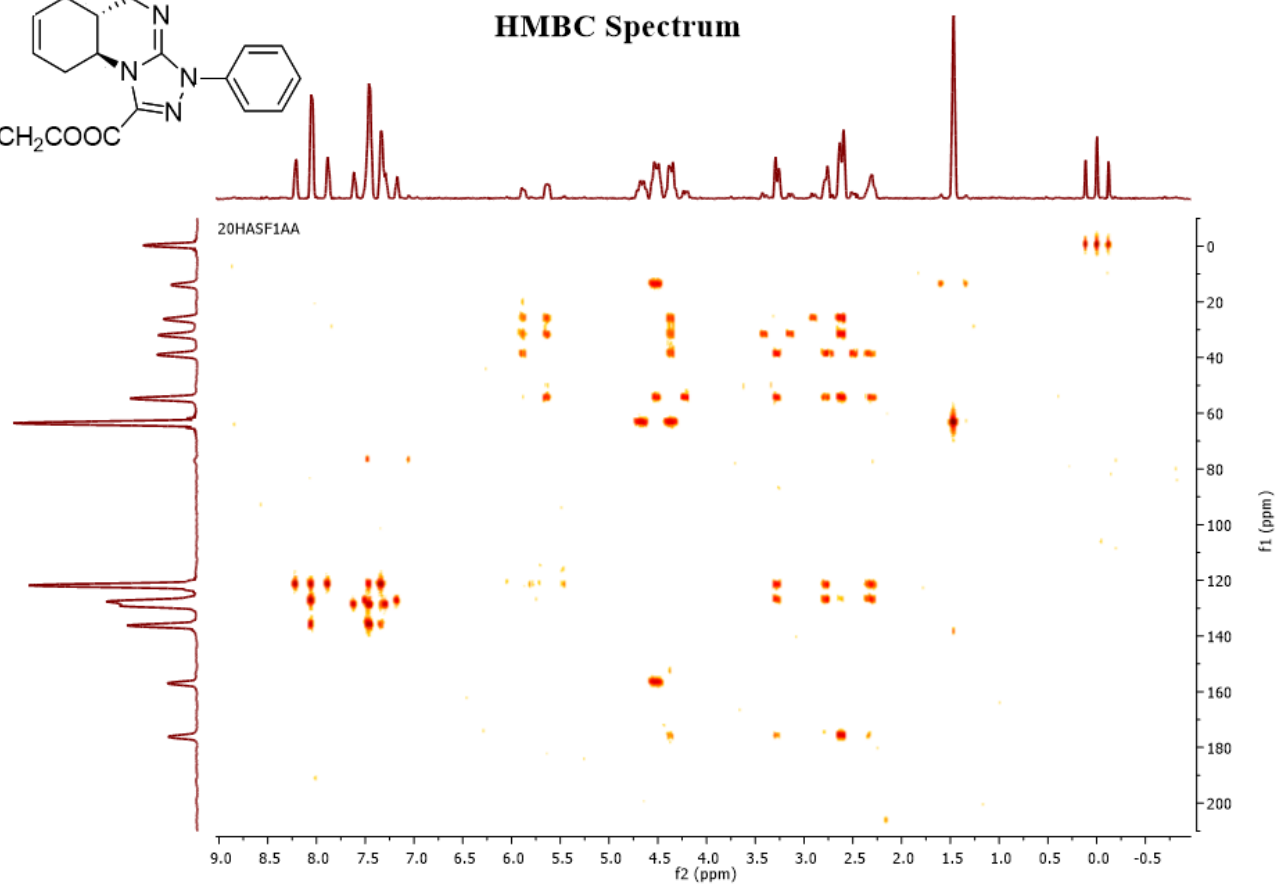

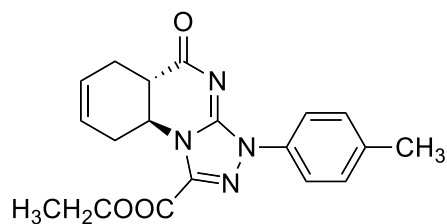

(4aS\*,8aS\*)-Ethyl 9-oxo-1-(*p*-tolyl)-1,4a,5,8,8a,9-hexahydro-[1,2,4]triazolo[4,3-*a*]quinazoline-3-carboxylate (**5b**)

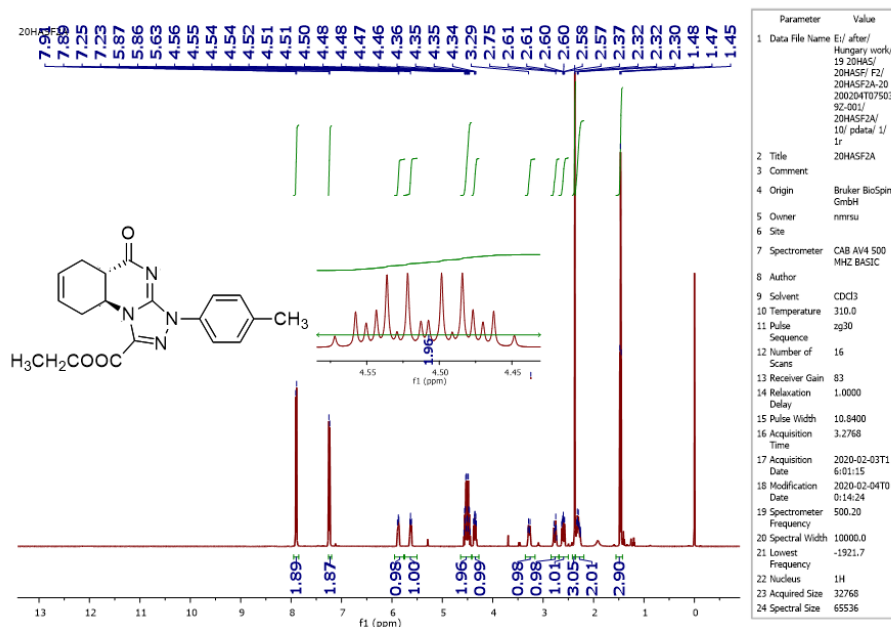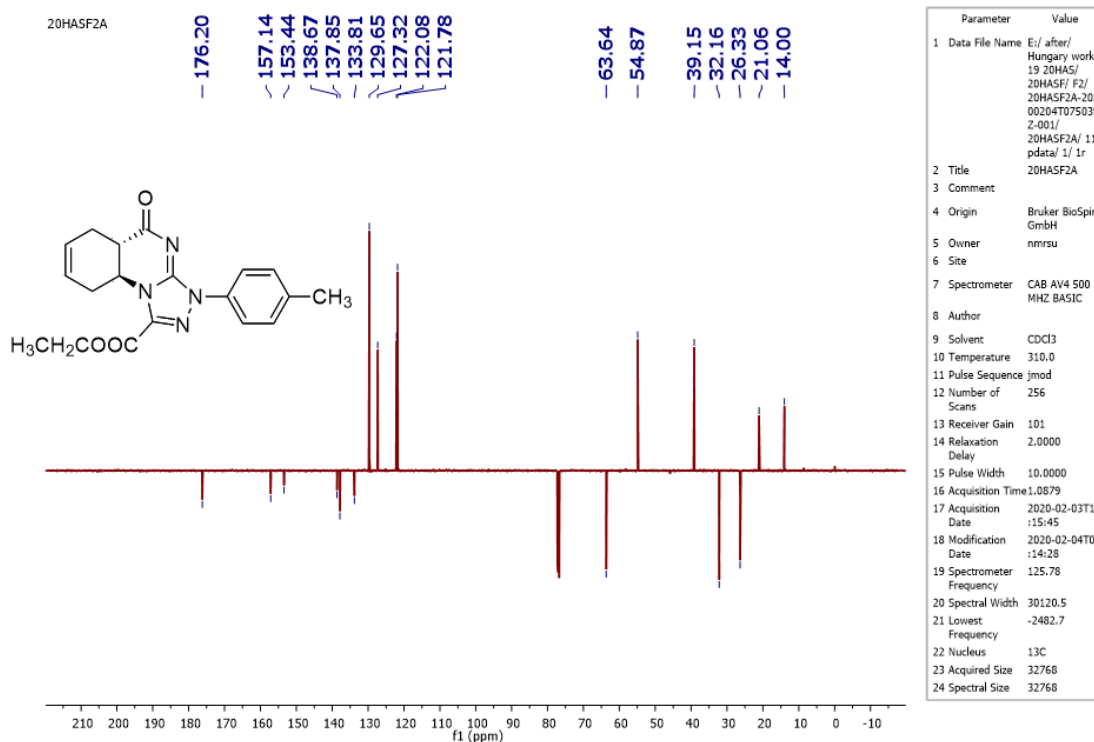

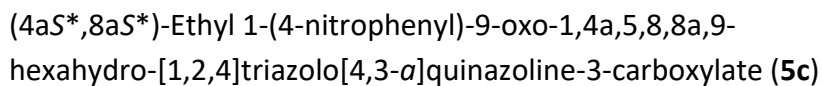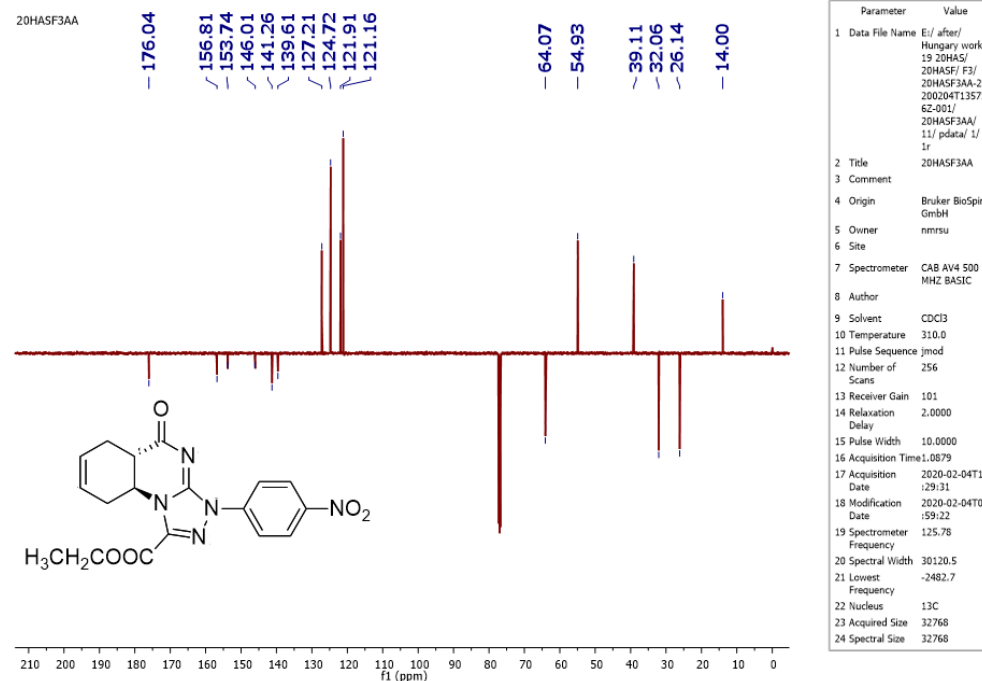

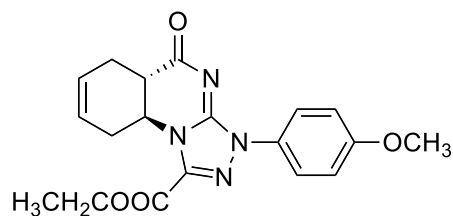

(4aS\*,8aS\*)-Ethyl 1-(4-methoxyphenyl)-9-oxo-1,4a,5,8,8a,9-hexahydro-[1,2,4]triazolo[4,3-a]quinazoline-3-carboxylate (**5d**)

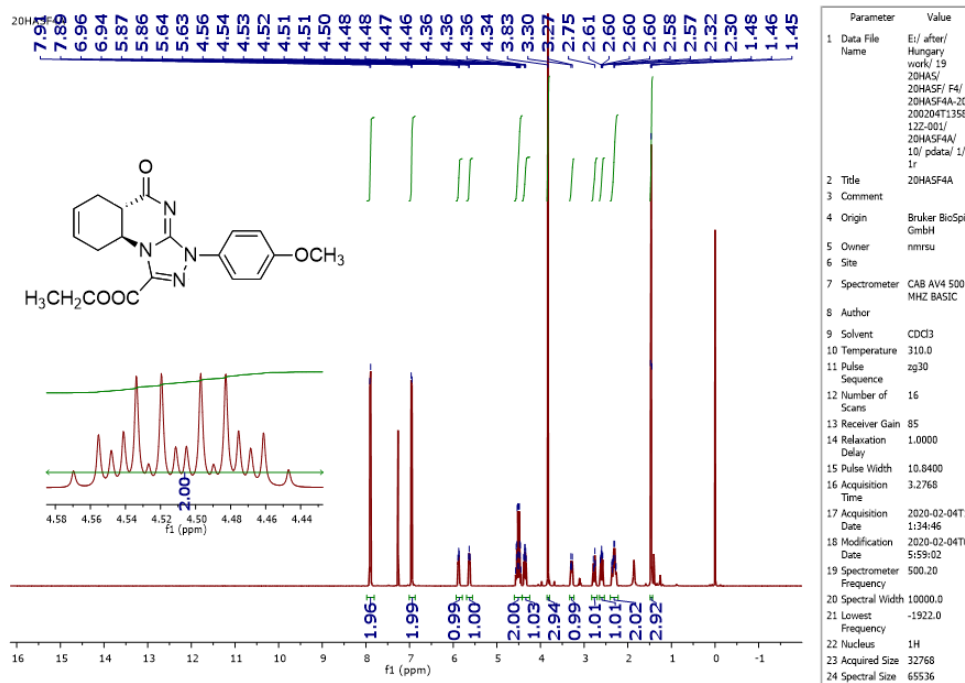

| Parameter                 | Value                                                                                                      |
|---------------------------|------------------------------------------------------------------------------------------------------------|
| 1 Data File Name          | E:/ after/ Hungary work/ 19 20H4S/ 20H4SF/ F4/ 20H4SF4A-20 200204T1358 122-001/ 20H4SF4A/ 10/ pdata/ 1/ 1r |
| 2 Title                   | 20H4SF4A                                                                                                   |
| 3 Comment                 |                                                                                                            |
| 4 Origin                  | Brüker BioSpin GmbH                                                                                        |
| 5 Owner                   | nmrsu                                                                                                      |
| 6 Site                    |                                                                                                            |
| 7 Spectrometer            | CAB AV4 500 MHz BASIC                                                                                      |
| 8 Author                  |                                                                                                            |
| 9 Solvent                 | CDCl <sub>3</sub>                                                                                          |
| 10 Temperature            | 310.0                                                                                                      |
| 11 Pulse Sequence         | zg30                                                                                                       |
| 12 Number of Scans        | 16                                                                                                         |
| 13 Receiver Gain          | 85                                                                                                         |
| 14 Relaxation Delay       | 1.0000                                                                                                     |
| 15 Pulse Width            | 10.8400                                                                                                    |
| 16 Acquisition Time       | 3.2768                                                                                                     |
| 17 Acquisition Date       | 2020-02-04T1 1:34:46                                                                                       |
| 18 Modification Date      | 2020-02-04T0 5:59:02                                                                                       |
| 19 Spectrometer Frequency | 500.20                                                                                                     |
| 20 Spectral Width         | 10000.0                                                                                                    |
| 21 Lowest Frequency       | -1922.0                                                                                                    |
| 22 Nucleus                | <sup>1</sup> H                                                                                             |
| 23 Acquired Size          | 32768                                                                                                      |
| 24 Spectral Size          | 65536                                                                                                      |

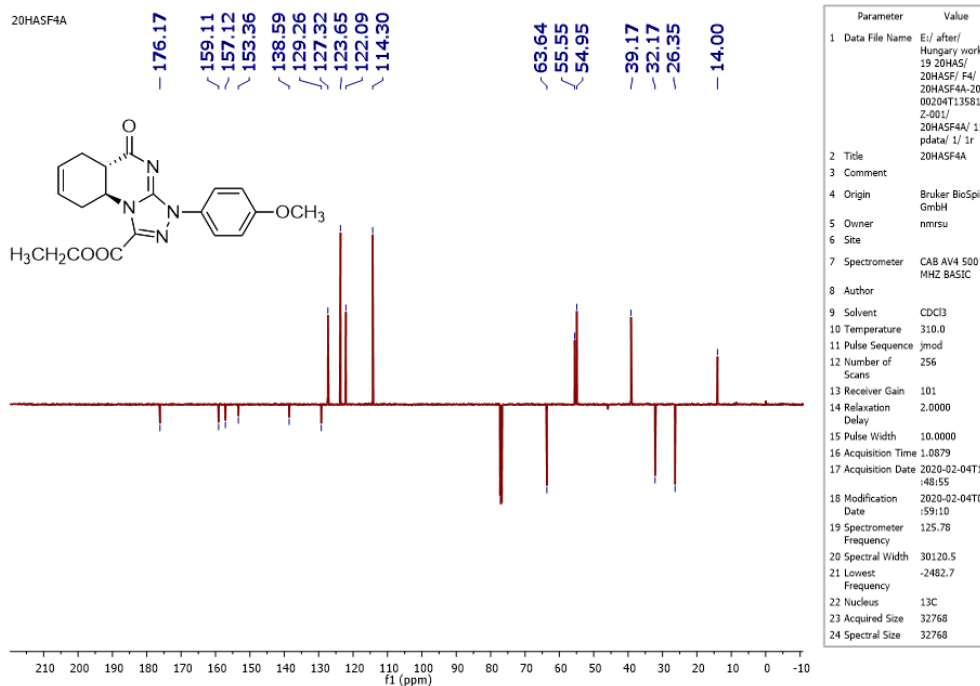

| Parameter                 | Value                                                                                                              |
|---------------------------|--------------------------------------------------------------------------------------------------------------------|
| 1 Data File Name          | E:/ after/ Hungary work/ 19 20H4S/ 20H4SF/ F4/ 20H4SF4A-20 00204T135812 Z-001/ 20H4SF4A/ 11/ pdata/ 1/ 1r 20H4SF4A |
| 2 Title                   |                                                                                                                    |
| 3 Comment                 |                                                                                                                    |
| 4 Origin                  | Brüker BioSpin GmbH                                                                                                |
| 5 Owner                   | nmrsu                                                                                                              |
| 6 Site                    |                                                                                                                    |
| 7 Spectrometer            | CAB AV4 500 MHz BASIC                                                                                              |
| 8 Author                  |                                                                                                                    |
| 9 Solvent                 | CDCl <sub>3</sub>                                                                                                  |
| 10 Temperature            | 310.0                                                                                                              |
| 11 Pulse Sequence         | jmod                                                                                                               |
| 12 Number of Scans        | 256                                                                                                                |
| 13 Receiver Gain          | 101                                                                                                                |
| 14 Relaxation Delay       | 2.0000                                                                                                             |
| 15 Pulse Width            | 10.0000                                                                                                            |
| 16 Acquisition Time       | 1.0879                                                                                                             |
| 17 Acquisition Date       | 2020-02-04T11 :48:55                                                                                               |
| 18 Modification Date      | 2020-02-04T05 :59:10                                                                                               |
| 19 Spectrometer Frequency | 125.78                                                                                                             |
| 20 Spectral Width         | 30120.5                                                                                                            |
| 21 Lowest Frequency       | -2482.7                                                                                                            |
| 22 Nucleus                | <sup>13</sup> C                                                                                                    |
| 23 Acquired Size          | 32768                                                                                                              |
| 24 Spectral Size          | 32768                                                                                                              |

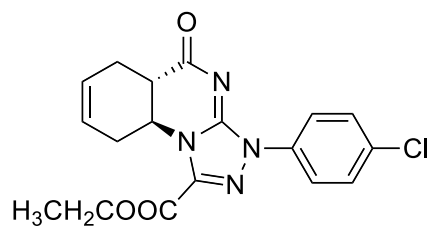

(4aS\*,8aS\*)-Ethyl 1-(4-chlorophenyl)-9-oxo-1,4a,5,8,8a,9-hexahydro-[1,2,4]triazolo[4,3-a]quinazoline-3-carboxylate (**5e**)

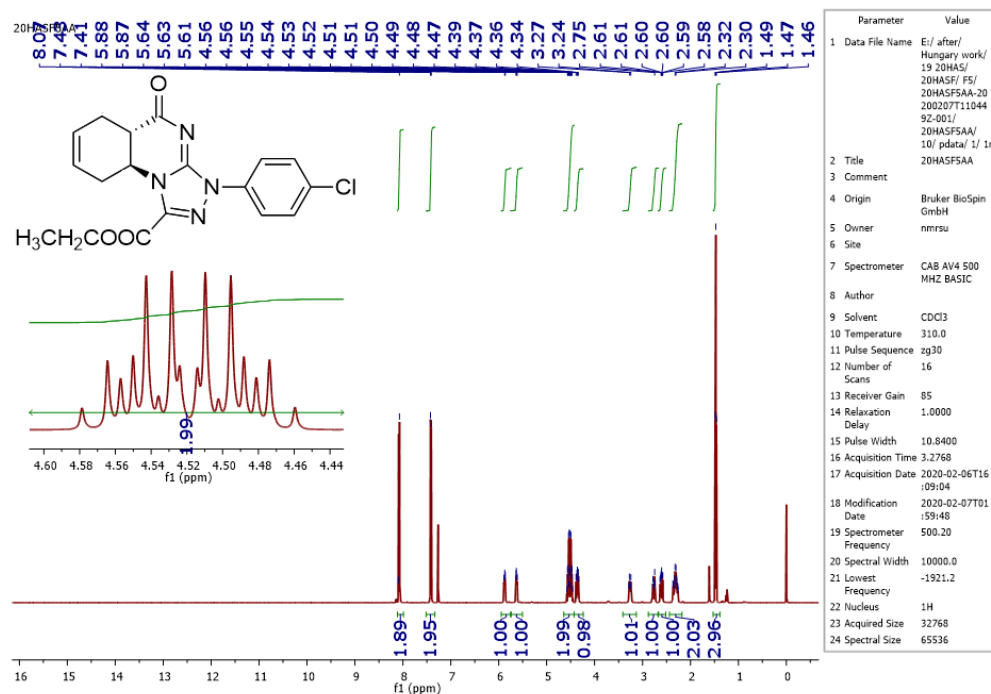

| Parameter                 | Value                                                                                                       |
|---------------------------|-------------------------------------------------------------------------------------------------------------|
| 1 Data File Name          | E:/ after/ Hungary work/ 19 20HAS/ 20HAS/ FS/ 20HASFSAA-20 200207T11044 92-001/ 20HASFSAA/ 10/ pdata/ 1/ 1r |
| 2 Title                   | 20HASFSAA                                                                                                   |
| 3 Comment                 |                                                                                                             |
| 4 Origin                  | Bruker BioSpin GmbH                                                                                         |
| 5 Owner                   | nmrsu                                                                                                       |
| 6 Site                    |                                                                                                             |
| 7 Spectrometer            | CAB AV4 500 MHz BASIC                                                                                       |
| 8 Author                  |                                                                                                             |
| 9 Solvent                 | CDCl3                                                                                                       |
| 10 Temperature            | 310.0                                                                                                       |
| 11 Pulse Sequence         | zg30                                                                                                        |
| 12 Number of Scans        | 16                                                                                                          |
| 13 Receiver Gain          | 85                                                                                                          |
| 14 Relaxation Delay       | 1.0000                                                                                                      |
| 15 Pulse Width            | 10.8400                                                                                                     |
| 16 Acquisition Time       | 3.2768                                                                                                      |
| 17 Acquisition Date       | 2020-02-06T16:09:04                                                                                         |
| 18 Modification Date      | 2020-02-07T01:59:48                                                                                         |
| 19 Spectrometer Frequency | 500.20                                                                                                      |
| 20 Spectral Width         | 10000.0                                                                                                     |
| 21 Lowest Frequency       | -1921.2                                                                                                     |
| 22 Nucleus                | 1H                                                                                                          |
| 23 Acquired Size          | 32768                                                                                                       |
| 24 Spectral Size          | 65536                                                                                                       |

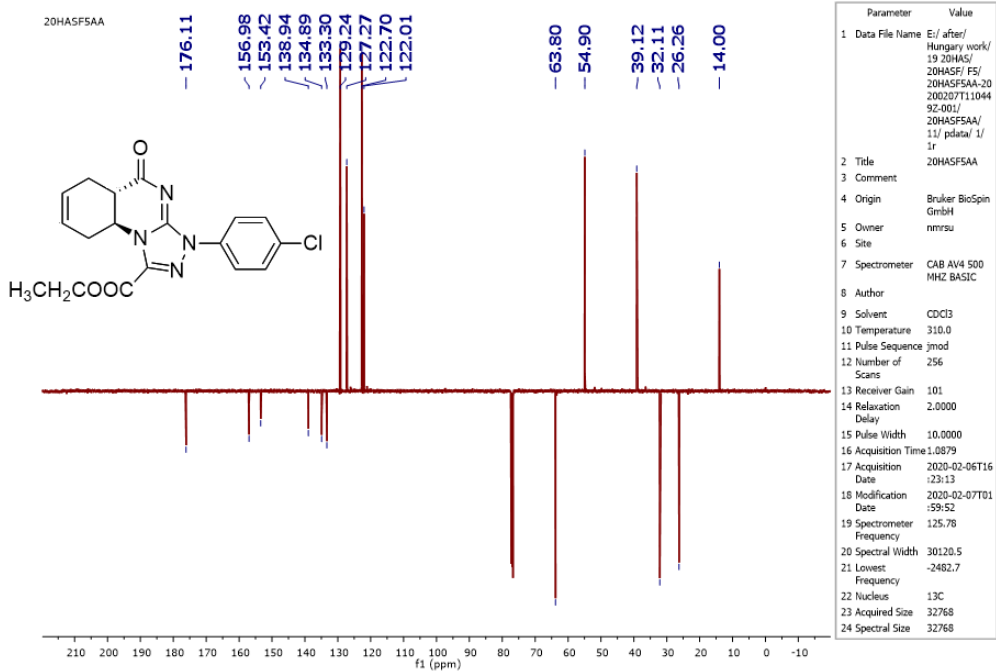

| Parameter                 | Value                                                                                                       |
|---------------------------|-------------------------------------------------------------------------------------------------------------|
| 1 Data File Name          | E:/ after/ Hungary work/ 19 20HAS/ 20HAS/ FS/ 20HASFSAA-20 200207T11044 92-001/ 20HASFSAA/ 10/ pdata/ 1/ 1r |
| 2 Title                   | 20HASFSAA                                                                                                   |
| 3 Comment                 |                                                                                                             |
| 4 Origin                  | Bruker BioSpin GmbH                                                                                         |
| 5 Owner                   | nmrsu                                                                                                       |
| 6 Site                    |                                                                                                             |
| 7 Spectrometer            | CAB AV4 500 MHz BASIC                                                                                       |
| 8 Author                  |                                                                                                             |
| 9 Solvent                 | CDCl3                                                                                                       |
| 10 Temperature            | 310.0                                                                                                       |
| 11 Pulse Sequence         | jmod                                                                                                        |
| 12 Number of Scans        | 256                                                                                                         |
| 13 Receiver Gain          | 101                                                                                                         |
| 14 Relaxation Delay       | 2.0000                                                                                                      |
| 15 Pulse Width            | 10.0000                                                                                                     |
| 16 Acquisition Time       | 1.0879                                                                                                      |
| 17 Acquisition Date       | 2020-02-06T16:23:13                                                                                         |
| 18 Modification Date      | 2020-02-07T01:59:52                                                                                         |
| 19 Spectrometer Frequency | 125.78                                                                                                      |
| 20 Spectral Width         | 30120.5                                                                                                     |
| 21 Lowest Frequency       | -2482.7                                                                                                     |
| 22 Nucleus                | 13C                                                                                                         |
| 23 Acquired Size          | 32768                                                                                                       |
| 24 Spectral Size          | 32768                                                                                                       |



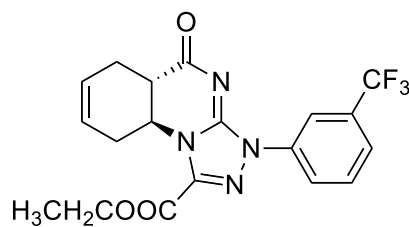

(4aS\*,8aS\*)-Ethyl 9-oxo-1-(3-(trifluoromethyl)phenyl)-1,4a,5,8,8a,9-hexahydro-[1,2,4]triazolo[4,3-a]quinazoline-3-carboxylate (**5f**)

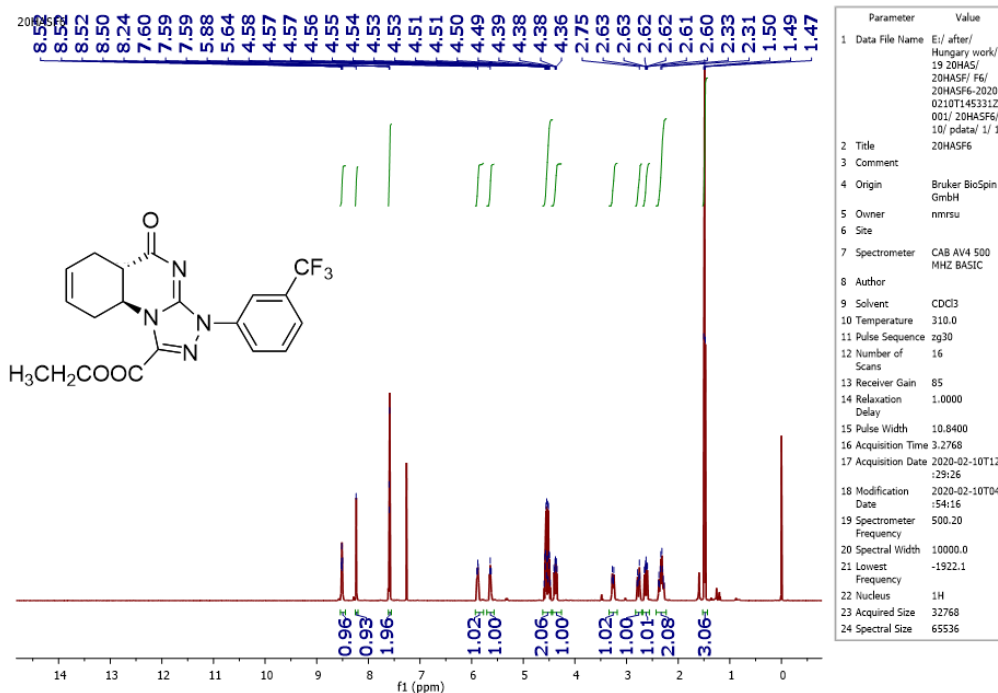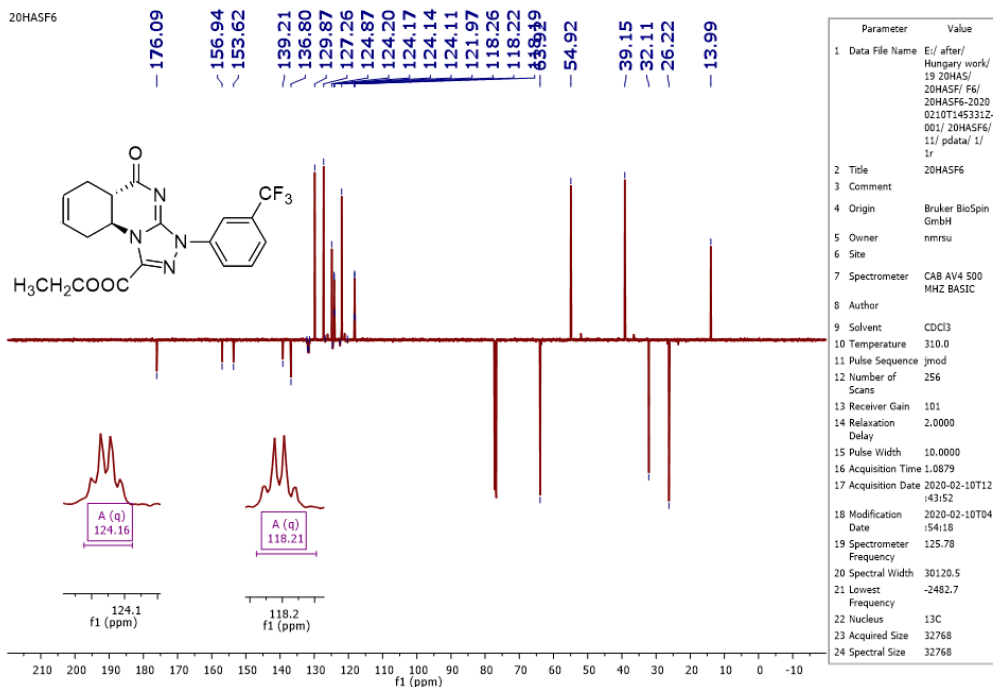

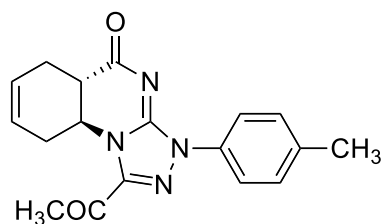

(4aS\*,8aS\*)-3-Acetyl-1-(*p*-tolyl)-4a,5,8,9-tetrahydro-[1,2,4]triazolo[4,3-*a*]quinazolin-9(1*H*)-one (**5g**)

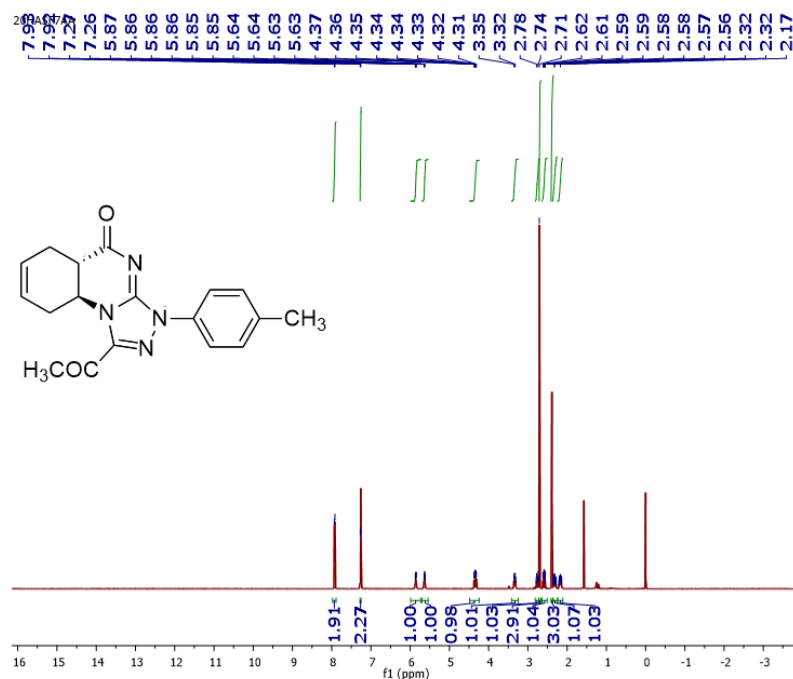

| Parameter                 | Value                                                                                                       |
|---------------------------|-------------------------------------------------------------------------------------------------------------|
| 1 Data File Name          | E:/ after/ Hungary work/ 19 20HAS/ 20HASF/ F7/ 20HASF7AA-20 200207T13071 12-00/ 20HASF7AA/ 10/ pdata/ 1/ 1r |
| 2 Title                   | 20HASF7AA                                                                                                   |
| 3 Comment                 |                                                                                                             |
| 4 Origin                  | Bruker BioSpin GmbH                                                                                         |
| 5 Owner                   | nmsu                                                                                                        |
| 6 Site                    |                                                                                                             |
| 7 Spectrometer            | CAB AV4 500 MHZ BASIC                                                                                       |
| 8 Author                  |                                                                                                             |
| 9 Solvent                 | CDCl3                                                                                                       |
| 10 Temperature            | 310.0                                                                                                       |
| 11 Pulse Sequence         | zg30                                                                                                        |
| 12 Number of Scans        | 16                                                                                                          |
| 13 Receiver Gain          | 65                                                                                                          |
| 14 Relaxation Delay       | 1.0000                                                                                                      |
| 15 Pulse Width            | 10.8400                                                                                                     |
| 16 Acquisition Time       | 3.2768                                                                                                      |
| 17 Acquisition Date       | 2020-02-07T11:33:08                                                                                         |
| 18 Modification Date      | 2020-02-07T06:02:34                                                                                         |
| 19 Spectrometer Frequency | 500.20                                                                                                      |
| 20 Spectral Width         | 10000.0                                                                                                     |
| 21 Lowest Frequency       | -1923.8                                                                                                     |
| 22 Nucleus                | 1H                                                                                                          |
| 23 Acquired Size          | 32768                                                                                                       |
| 24 Spectral Size          | 65536                                                                                                       |

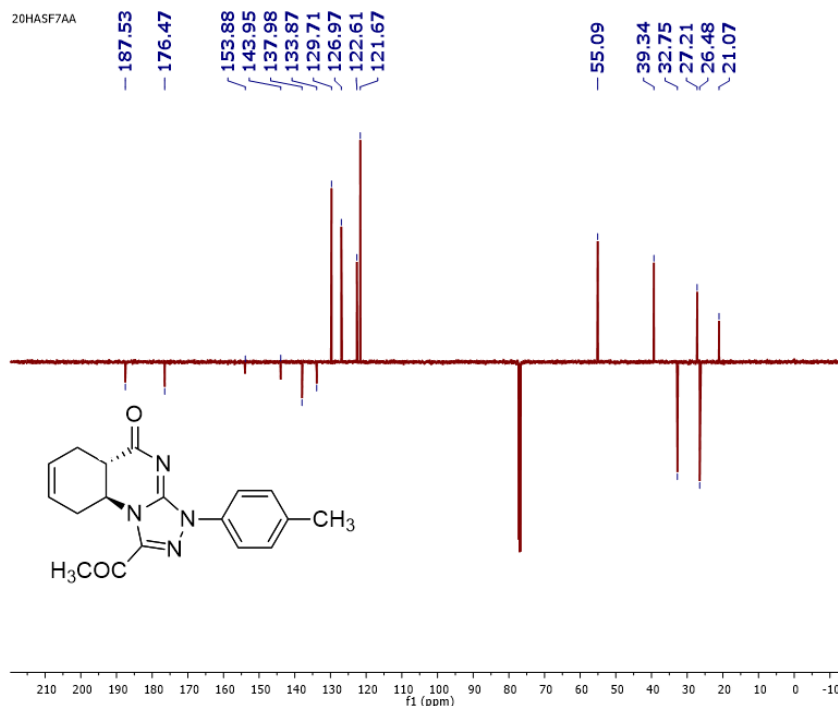

| Parameter                 | Value                                                                                                      |
|---------------------------|------------------------------------------------------------------------------------------------------------|
| 1 Data File Name          | E:/ after/ Hungary work/ 19 20HAS/ 20HASF/ F7/ 20HASF7AA-2 020207T1307 112-00/ 20HASF7AA/ 11/ pdata/ 1/ 1r |
| 2 Title                   | 20HASF7AA                                                                                                  |
| 3 Comment                 |                                                                                                            |
| 4 Origin                  | Bruker BioSpin GmbH                                                                                        |
| 5 Owner                   | nmsu                                                                                                       |
| 6 Site                    |                                                                                                            |
| 7 Spectrometer            | CAB AV4 500 MHZ BASIC                                                                                      |
| 8 Author                  |                                                                                                            |
| 9 Solvent                 | CDCl3                                                                                                      |
| 10 Temperature            | 310.0                                                                                                      |
| 11 Pulse Sequence         | jmod                                                                                                       |
| 12 Number of Scans        | 256                                                                                                        |
| 13 Receiver Gain          | 101                                                                                                        |
| 14 Relaxation Delay       | 2.0000                                                                                                     |
| 15 Pulse Width            | 10.0000                                                                                                    |
| 16 Acquisition Time       | 1.0879                                                                                                     |
| 17 Acquisition Date       | 2020-02-07T11:47:35                                                                                        |
| 18 Modification Date      | 2020-02-07T06:02:38                                                                                        |
| 19 Spectrometer Frequency | 125.78                                                                                                     |
| 20 Spectral Width         | 30120.5                                                                                                    |
| 21 Lowest Frequency       | -2482.7                                                                                                    |
| 22 Nucleus                | 13C                                                                                                        |
| 23 Acquired Size          | 32768                                                                                                      |
| 24 Spectral Size          | 32768                                                                                                      |

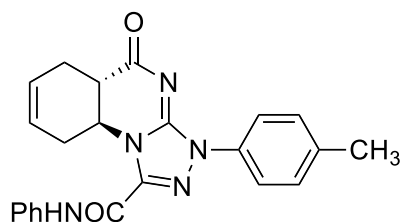

(4a*S*\*,8a*S*\*)-9-Oxo-*N*-phenyl-1-(*p*-tolyl)-1,4a,5,8,8a,9-hexahydro-[1,2,4]triazolo[4,3-*a*]quinazoline-3-carboxamide (**5h**)

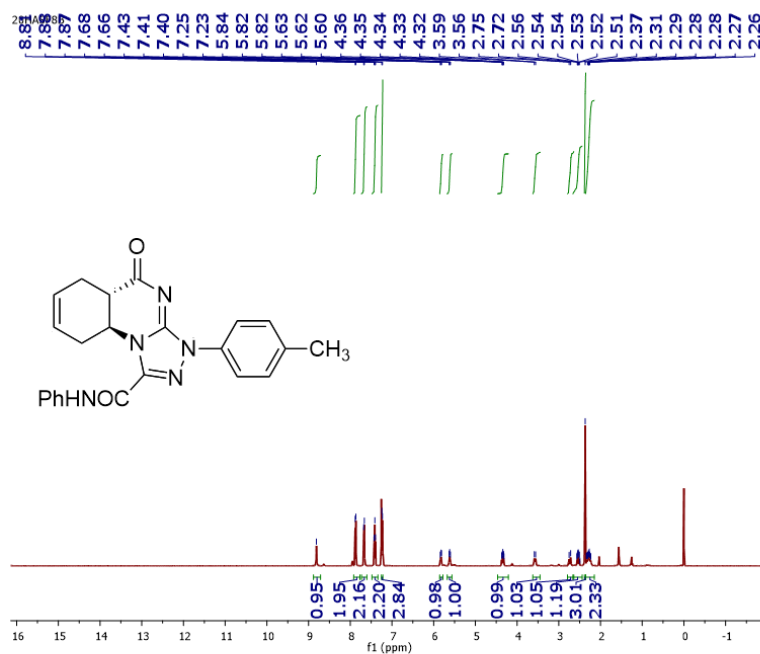

| Parameter                 | Value                                                                                                      |
|---------------------------|------------------------------------------------------------------------------------------------------------|
| 1 Data File Name          | E:/ after/ Hungary work/ 19 20HAS/ 20HASF/ FB/ 20HASFBB-20 200211T0809 012-001/ 20HASFBB/ 10/ pdata/ 1/ 1r |
| 2 Title                   | 20HASFBB                                                                                                   |
| 3 Comment                 |                                                                                                            |
| 4 Origin                  | Bruker BioSpin GmbH                                                                                        |
| 5 Owner                   | nmsu                                                                                                       |
| 6 Site                    |                                                                                                            |
| 7 Spectrometer            | CAB AV4 500 MHZ BASIC                                                                                      |
| 8 Author                  |                                                                                                            |
| 9 Solvent                 | CDCl3                                                                                                      |
| 10 Temperature            | 310.0                                                                                                      |
| 11 Pulse                  | zg30                                                                                                       |
| Sequence                  |                                                                                                            |
| 12 Number of Scans        | 16                                                                                                         |
| 13 Receiver Gain          | 81                                                                                                         |
| 14 Relaxation Delay       | 1.0000                                                                                                     |
| 15 Pulse Width            | 10.8400                                                                                                    |
| 16 Acquisition Time       | 3.2768                                                                                                     |
| 17 Acquisition Date       | 2020-02-10T1                                                                                               |
| 18 Modification Date      | 2020-02-11T0                                                                                               |
| 19 Spectrometer Frequency | 500.20                                                                                                     |
| 20 Spectral Width         | 10000.0                                                                                                    |
| 21 Lowest Frequency       | -1925.1                                                                                                    |
| 22 Nucleus                | 1H                                                                                                         |
| 23 Acquired Size          | 32768                                                                                                      |
| 24 Spectral Size          | 65536                                                                                                      |

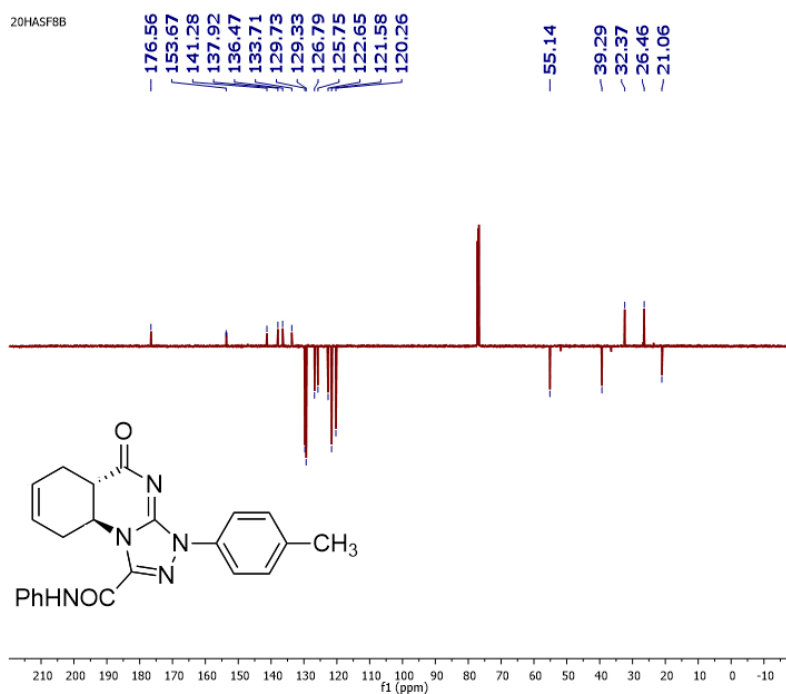

| Parameter                 | Value                                                                                                      |
|---------------------------|------------------------------------------------------------------------------------------------------------|
| 1 Data File Name          | E:/ after/ Hungary work/ 19 20HAS/ 20HASF/ FB/ 20HASFBB-202 00211T080901 2-001/ 20HASFBB/ 11/ pdata/ 1/ 1r |
| 2 Title                   | 20HASFBB                                                                                                   |
| 3 Comment                 |                                                                                                            |
| 4 Origin                  | Bruker BioSpin GmbH                                                                                        |
| 5 Owner                   | nmsu                                                                                                       |
| 6 Site                    |                                                                                                            |
| 7 Spectrometer            | CAB AV4 500 MHZ BASIC                                                                                      |
| 8 Author                  |                                                                                                            |
| 9 Solvent                 | CDCl3                                                                                                      |
| 10 Temperature            | 310.0                                                                                                      |
| 11 Pulse Sequence         | jmod                                                                                                       |
| 12 Number of Scans        | 256                                                                                                        |
| 13 Receiver Gain          | 101                                                                                                        |
| 14 Relaxation Delay       | 2.0000                                                                                                     |
| 15 Pulse Width            | 10.0000                                                                                                    |
| 16 Acquisition Time       | 1.0879                                                                                                     |
| 17 Acquisition Date       | 2020-02-10T13 :03:31                                                                                       |
| 18 Modification Date      | 2020-02-11T00 :08:56                                                                                       |
| 19 Spectrometer Frequency | 125.78                                                                                                     |
| 20 Spectral Width         | 30120.5                                                                                                    |
| 21 Lowest Frequency       | -2482.7                                                                                                    |
| 22 Nucleus                | 13C                                                                                                        |
| 23 Acquired Size          | 32768                                                                                                      |
| 24 Spectral Size          | 32768                                                                                                      |

## Crystallographic details of compound 5a

**Table S1.** Crystal Data.

| 5a                                         |                                                               |
|--------------------------------------------|---------------------------------------------------------------|
| CCDC                                       |                                                               |
| empirical formula                          | C <sub>18</sub> H <sub>18</sub> N <sub>4</sub> O <sub>3</sub> |
| fw                                         | 338.36                                                        |
| temp (K)                                   | 120(2)                                                        |
| $\lambda$ (Å)                              | 1.54184                                                       |
| cryst syst                                 | Triclinic                                                     |
| space group                                | P $\bar{1}$                                                   |
| <i>a</i> (Å)                               | 9.5332(3)                                                     |
| <i>b</i> (Å)                               | 10.4081(3)                                                    |
| <i>c</i> (Å)                               | 16.8864(5)                                                    |
| $\alpha$ (deg)                             | 89.227(2)                                                     |
| $\beta$ (deg)                              | 81.130(2)                                                     |
| $\gamma$ (deg)                             | 74.199(3)                                                     |
| <i>V</i> (Å <sup>3</sup> )                 | 1592.20(9)                                                    |
| <i>Z</i>                                   | 4                                                             |
| $\rho_{\text{calc}}$ (Mg/m <sup>3</sup> )  | 1.412                                                         |
| $\mu$ (Mo K $\alpha$ ) (mm <sup>-1</sup> ) | 0.812                                                         |
| No. reflns.                                | 42738                                                         |
| Unique reflns.                             | 6682                                                          |
| Completeness to $\theta=67.684^\circ$      | 100%                                                          |
| GOOF (F <sup>2</sup> )                     | 1.029                                                         |
| R <sub>int</sub>                           | 0.0503                                                        |
| R1 <sup>a</sup> ( <i>I</i> ≥ 2σ)           | 0.0377                                                        |
| wR2 <sup>b</sup> ( <i>I</i> ≥ 2σ)          | 0.0932                                                        |

$$^a R1 = \sum ||F_o| - |F_c|| / \sum |F_o|. \quad ^b wR2 = \{\sum [w(F_o^2 - F_c^2)^2] / \sum [w(F_o^2)^2]\}^{1/2}$$

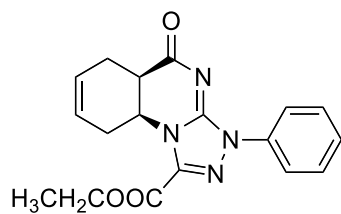

(4aS\*,8aR\*)-Ethyl 9-oxo-1-phenyl-1,4a,5,8,8a,9-hexahydro[1,2,4]triazolo[4,3-a]quinazoline-3-carboxylate (**4a**)

D:\DATA\...20230126\PM-20230126-POS

01/26/23 11:18:13

4A

PM-20230126-POS #76-89 RT: 0.39-0.45 AV: 14 NL: 5.62E9

T: FTMS + p ESI Full ms [125.0000-1000.0000]

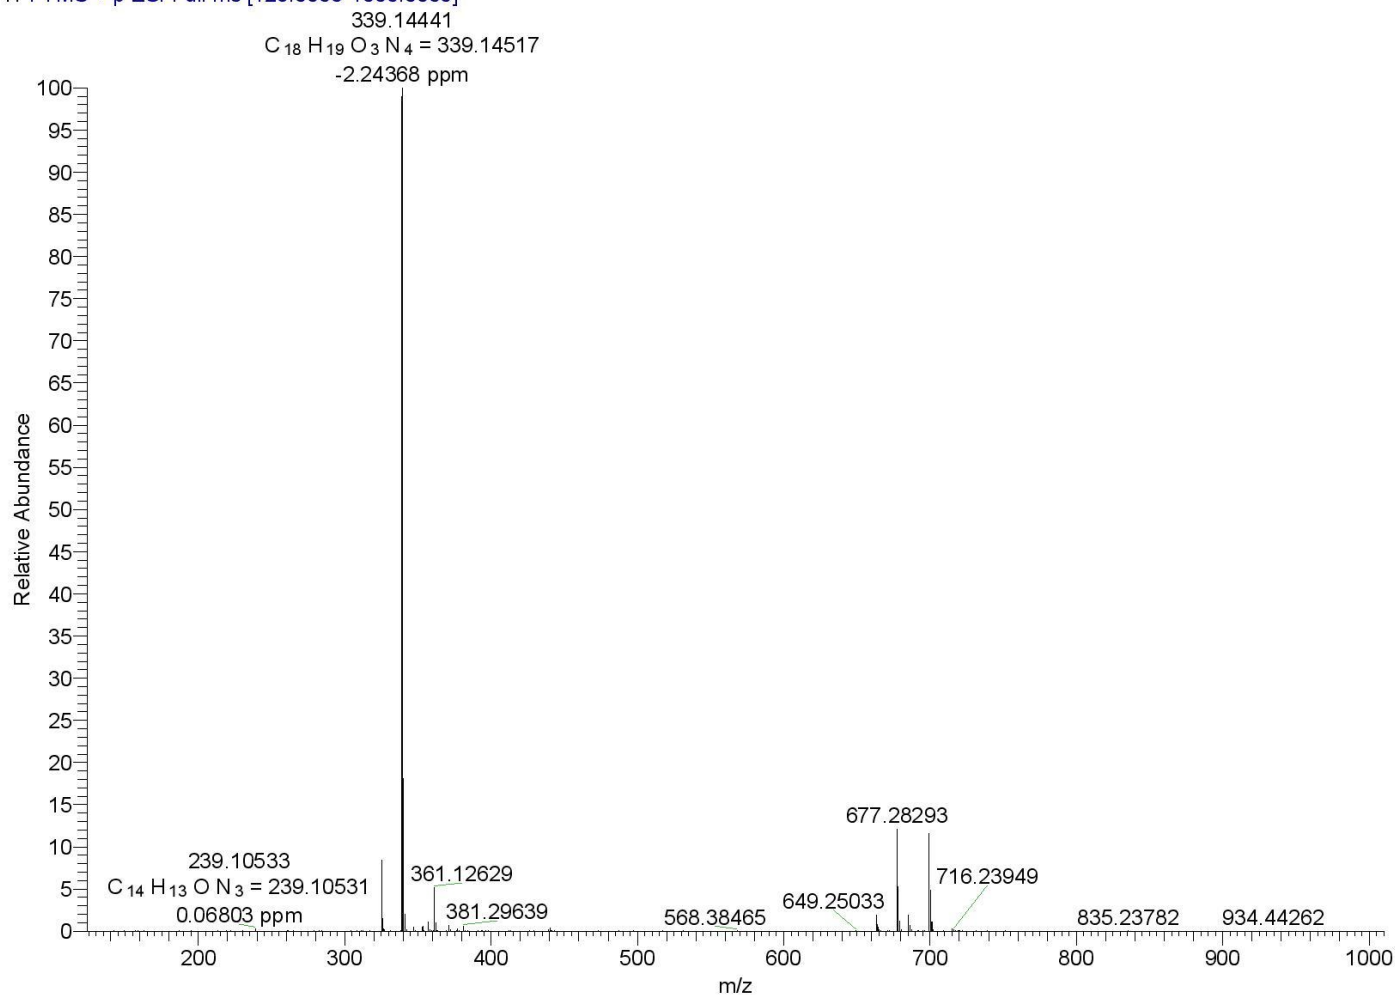

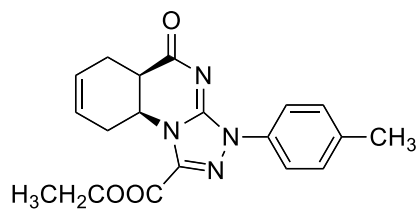

(4a*S*\*,8a*R*\*)-Ethyl 9-oxo-1-(*p*-tolyl)-1,4a,5,8,8a,9-hexahydro[1,2,4]triazolo[4,3-*a*]quinazoline-3-carboxylate (**4b**)

D:\DATA\...20230126\PM-20230126-POS

01/26/23 11:18:13

4A

PM-20230126-POS #332-348 RT: 1.72-1.80 AV: 17 NL: 6.17E9

T: FTMS + p ESI Full ms [125.0000-1000.0000]

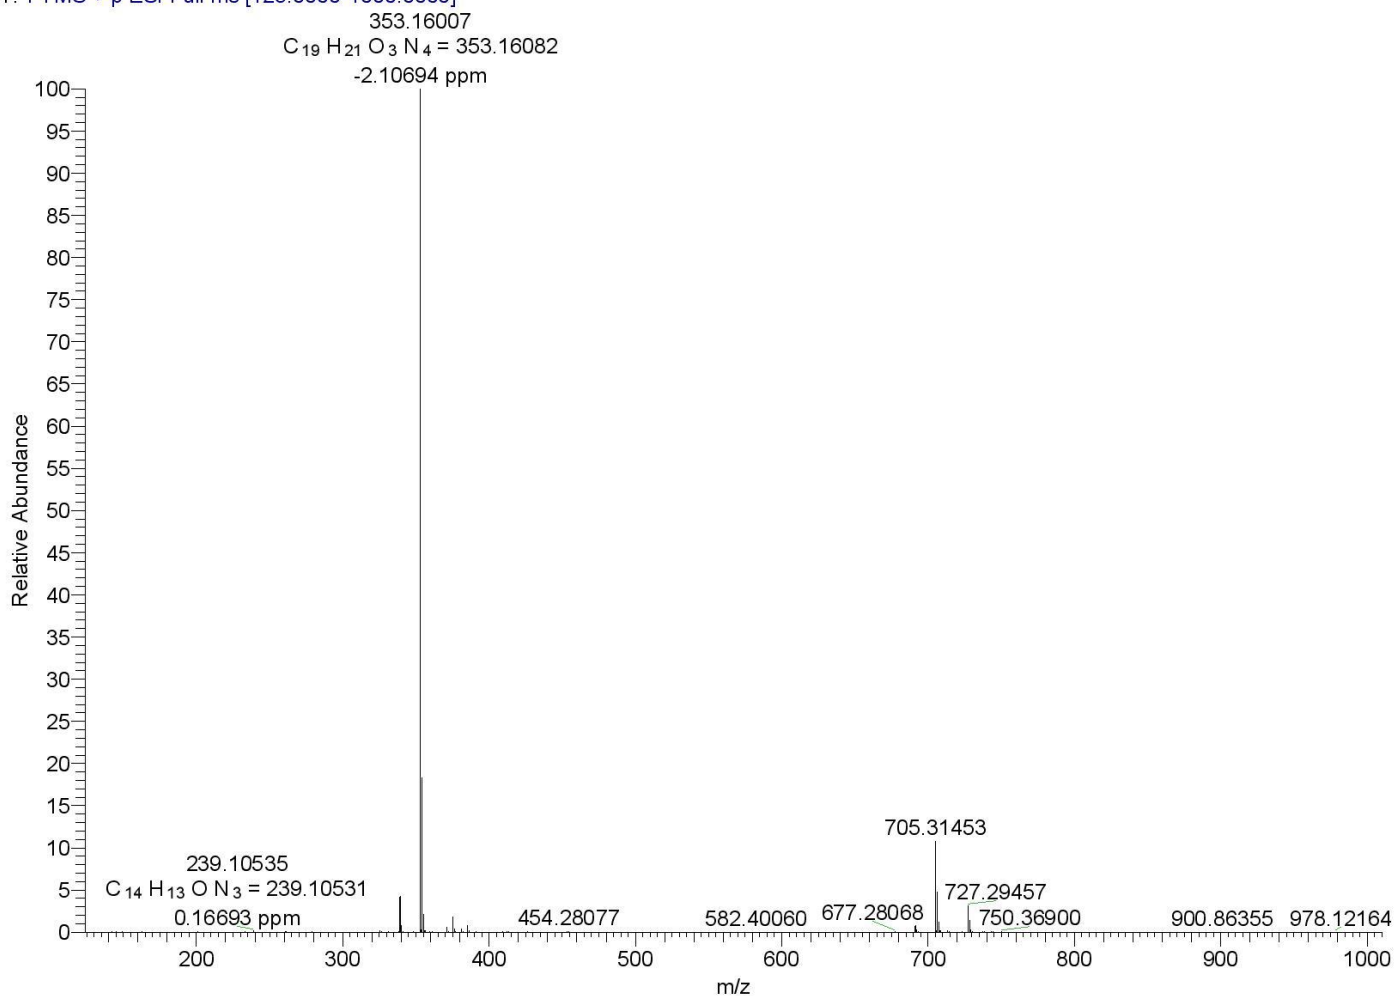

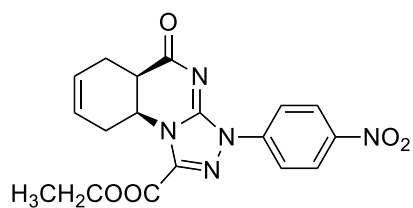

(4a*S*<sup>\*</sup>,8a*R*<sup>\*</sup>)-Ethyl 9-oxo-1-(4-nitrophenyl)-1,4a,5,8,8a,9-

hexahydro-[1,2,4]triazolo[4,3-*a*]quinazoline-3-carboxylate (**4c**)

D:\DATA\...20230126\PM-20230126-POS

01/26/23 11:18:13

4A

PM-20230126-POS #529-549 RT: 2.73-2.83 AV: 21 NL: 1.70E9

T: FTMS + p ESI Full ms [125.0000-1000.0000]

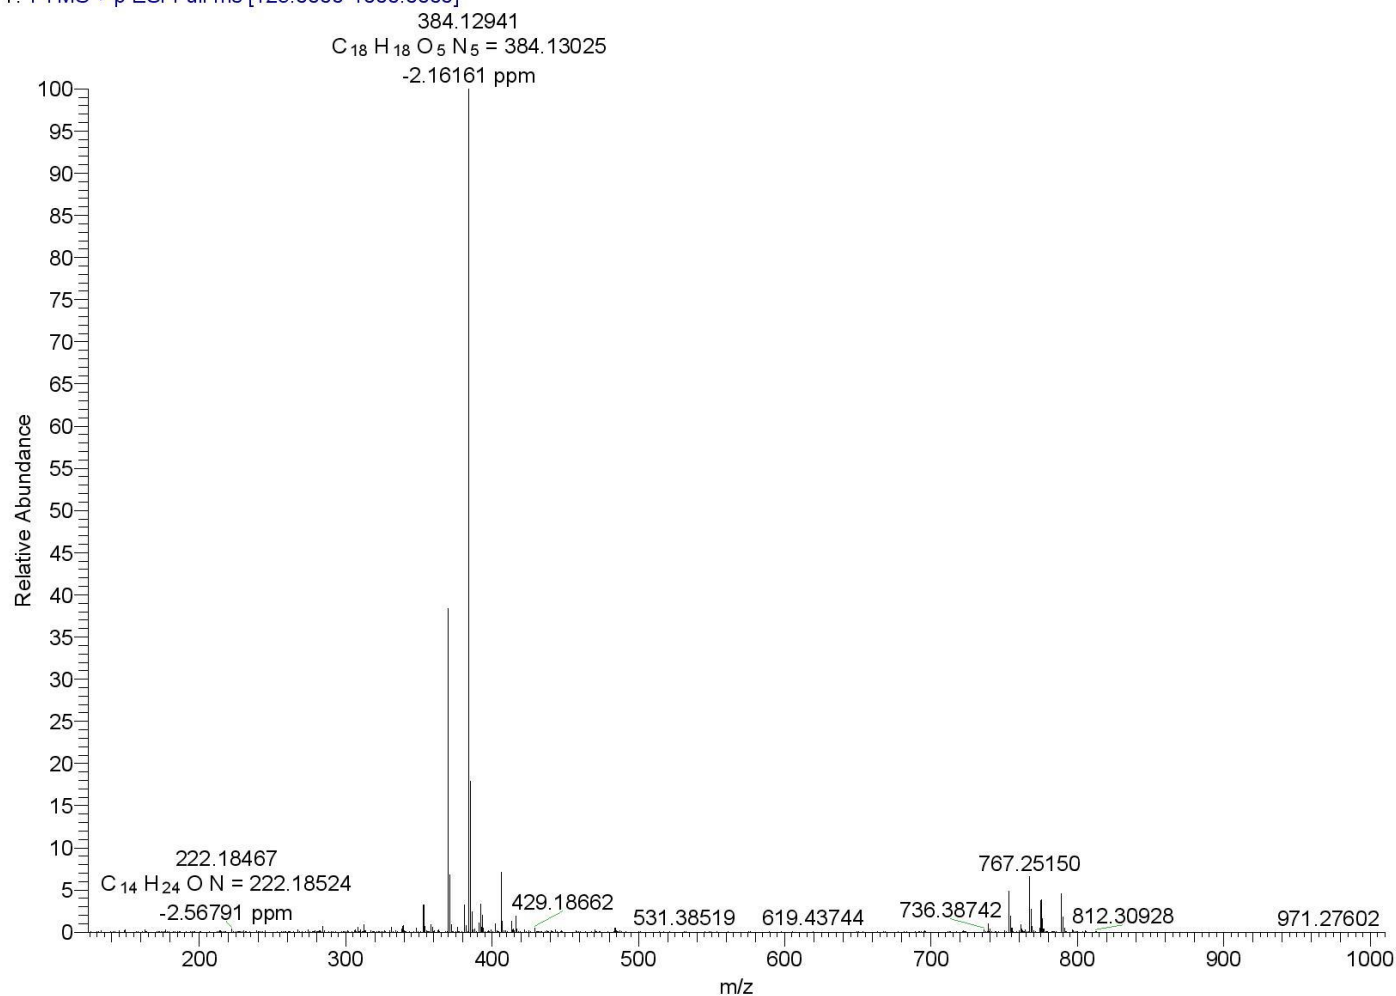

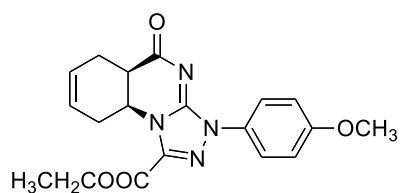

(4a*S*\*,8a*R*\*)-Ethyl 9-oxo-1-(4-methoxyphenyl)-1,4a,5,8,8a,9-hexahydro[1,2,4]triazolo[4,3-*a*]quinazoline-3-carboxylate (**4d**)

D:\DATA\...120230126\PM-20230126-POS

01/26/23 11:18:13

4A

PM-20230126-POS #901-936 RT: 4.63-4.81 AV: 36 NL: 2.51E9

T: FTMS + p ESI Full ms [125.0000-1000.0000]

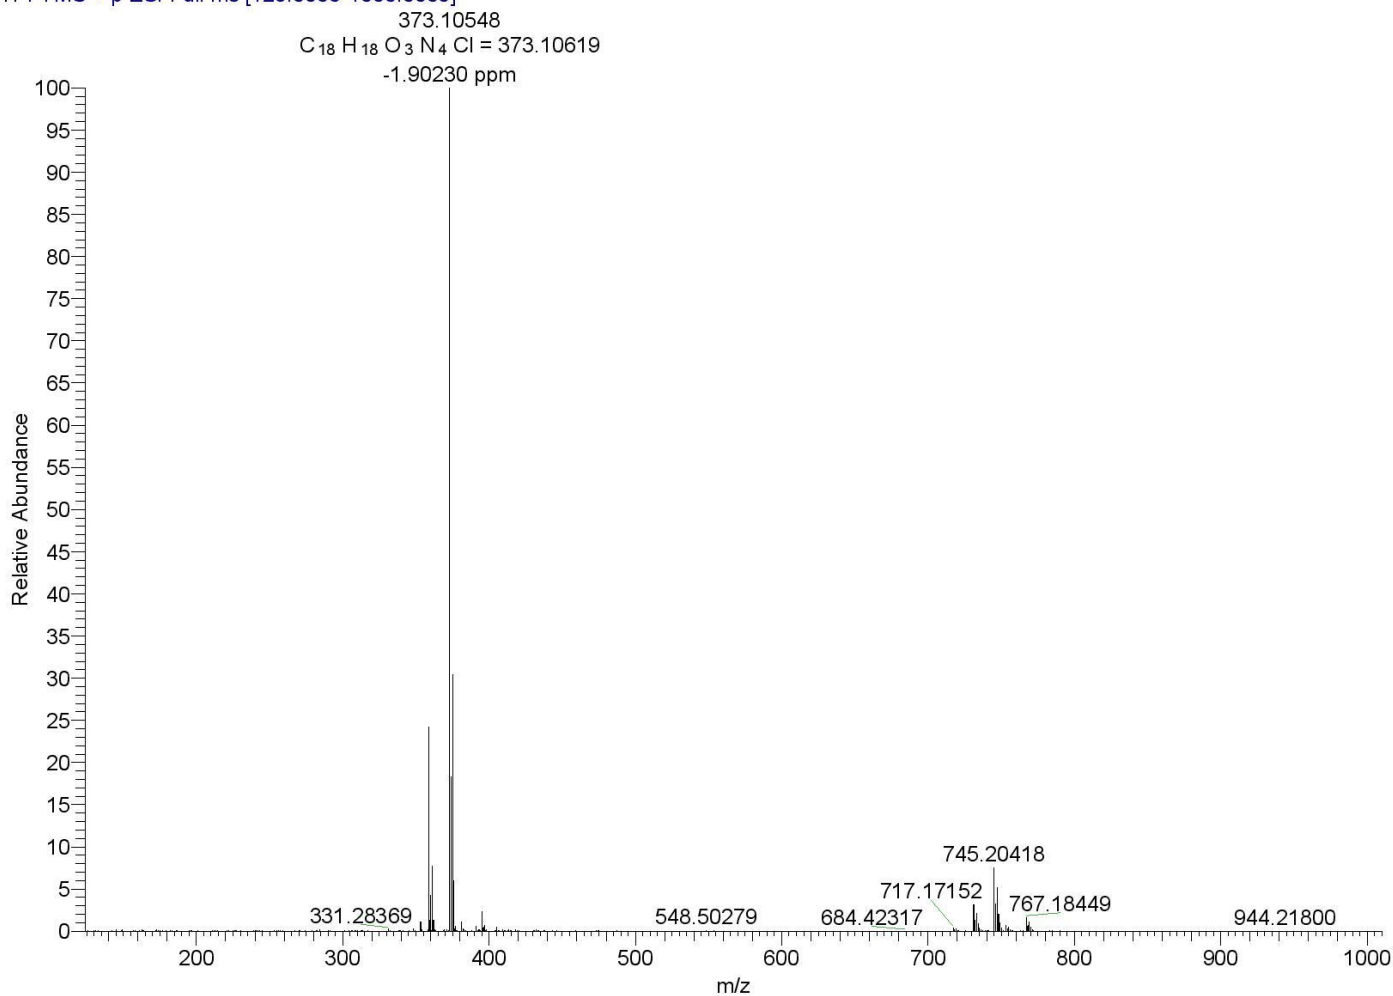



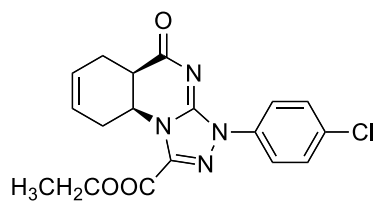

(4a*S*\*,8a*R*\*)-Ethyl 9-oxo-1-(4-chlorophenyl)-1,4a,5,8,8a,9-hexahydro[1,2,4]triazolo[4,3-*a*]quinazoline-3-carboxylate (**4e**)

D:\DATA\...20230126\PM-20230126-POS

01/26/23 11:18:13

4A

PM-20230126-POS #901-936 RT: 4.63-4.81 AV: 36 NL: 2.51E9

T: FTMS + p ESI Full ms [125.0000-1000.0000]

373.10548  
C<sub>18</sub> H<sub>18</sub> O<sub>3</sub> N<sub>4</sub> Cl = 373.10619  
-1.90230 ppm

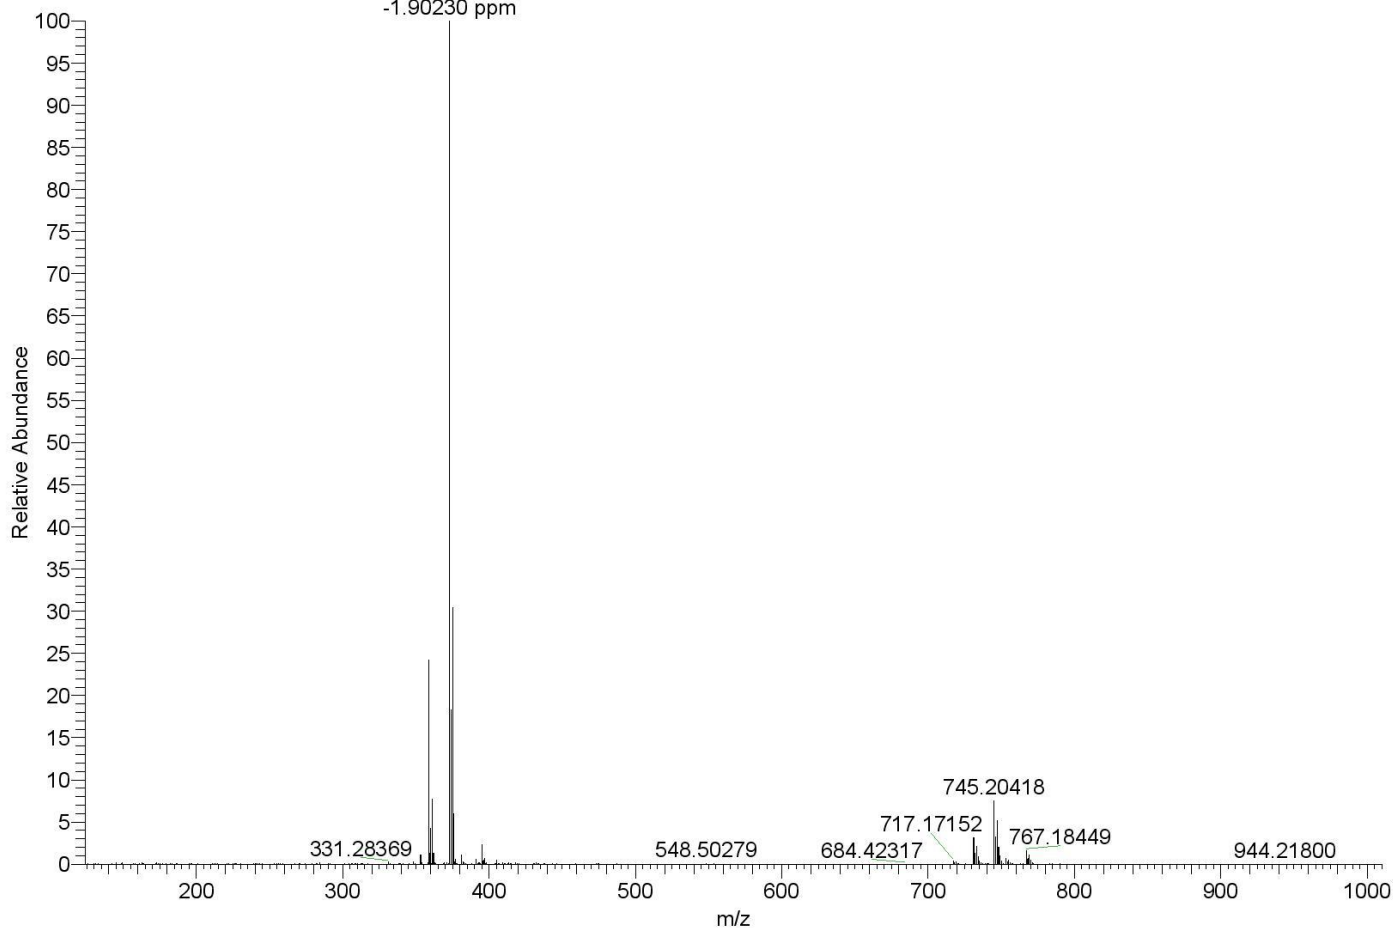

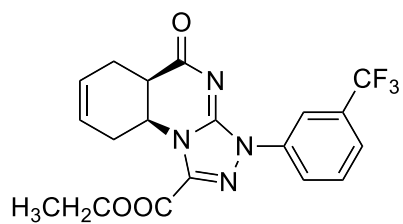

(4a*S*\*,8a*R*\*)-Ethyl 9-oxo-1-(3-(trifluoromethyl)phenyl)-  
1,4a,5,8,8a,9-hexahydro[1,2,4]triazolo[4,3-*a*]quinazoline-3-  
carboxylate (**4f**)

D:\DATA\...20230126\PM-20230126-POS

01/26/23 11:18:13

4A

PM-20230126-POS #1060-1088 RT: 5.44-5.59 AV: 29 NL: 2.95E9

T: FTMS + p ESI Full ms [125.0000-1000.0000]

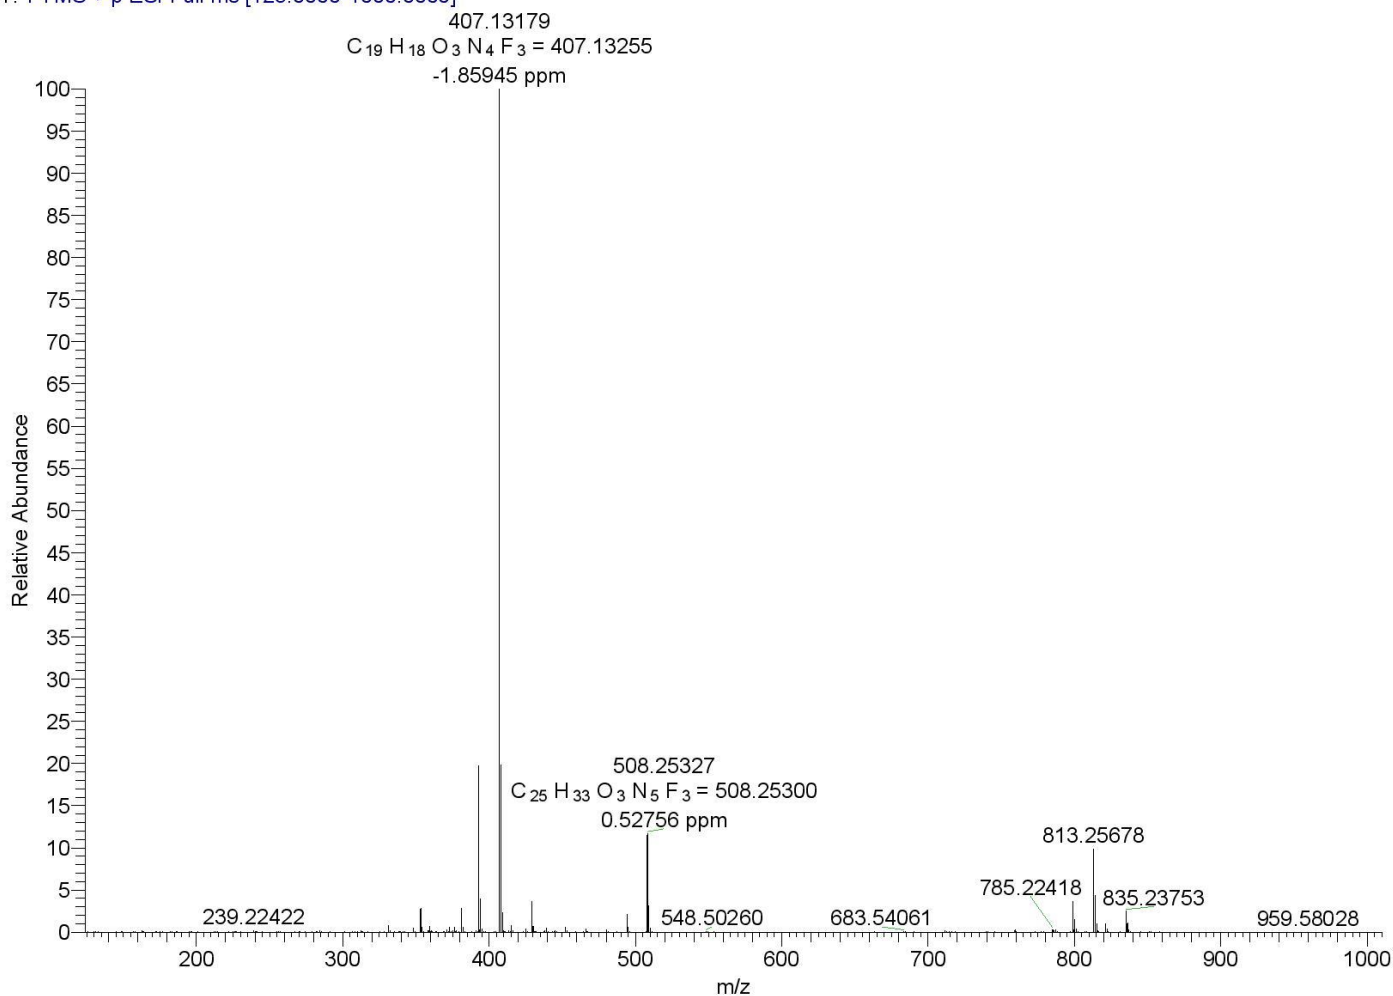

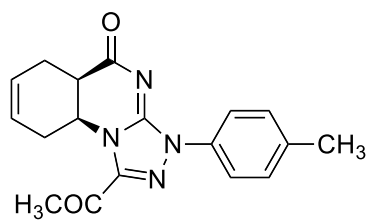

(4a*S*\*,8a*R*\*)-3-Acetyl-1-(*p*-tolyl)-4a,5,8,9-tetrahydro[1,2,4]triazolo[4,3-*a*]quinazoline-9(1*H*)-one (**4g**)

D:\DATA\...20230126\PM-20230126-POS

01/26/23 11:18:13

4A

PM-20230126-POS #1224-1244 RT: 6.28-6.38 AV: 21 NL: 3.22E9

T: FTMS + p ESI Full ms [125.0000-1000.0000]

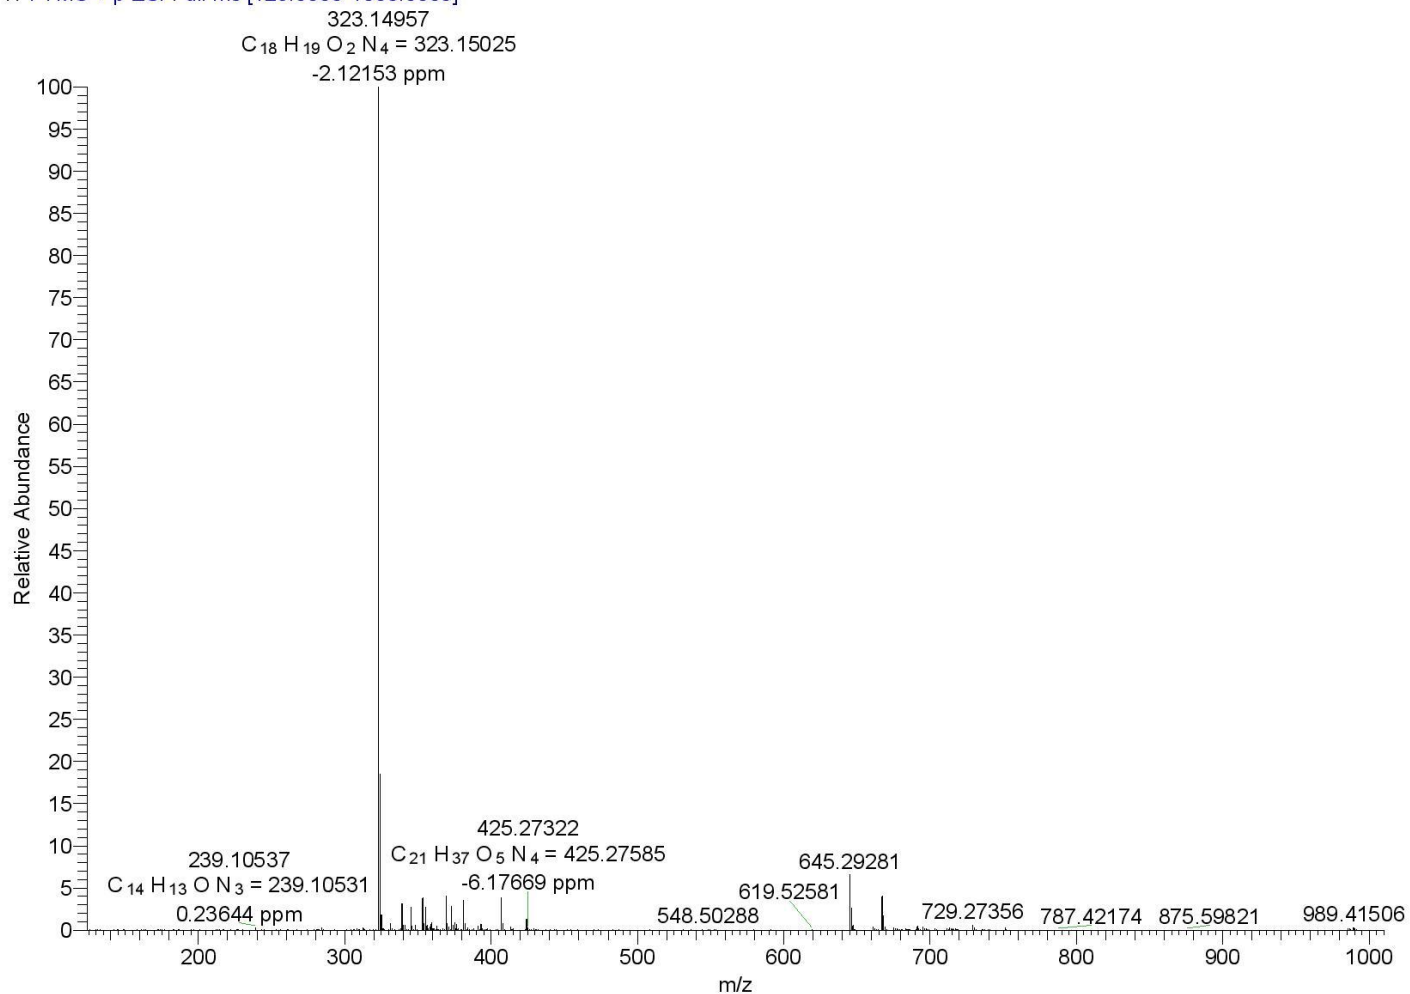

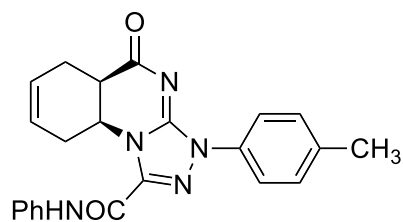

(4a*S*\*,8a*R*\*)-9-Oxo-*N*-Phenyl-1-(*p*-tolyl)-1,4a,5,8,8a,9-hexahydro[1,2,4]triazolo[4,3-*a*]quinazoline-3-carboxamide (**4h**)

D:\DATA\...20230126\PM-20230126-POS

01/26/23 11:18:13

4A

PM-20230126-POS #1365-1385 RT: 7.01-7.11 AV: 21 NL: 2.82E9

T: FTMS + p ESI Full ms [125.0000-1000.0000]

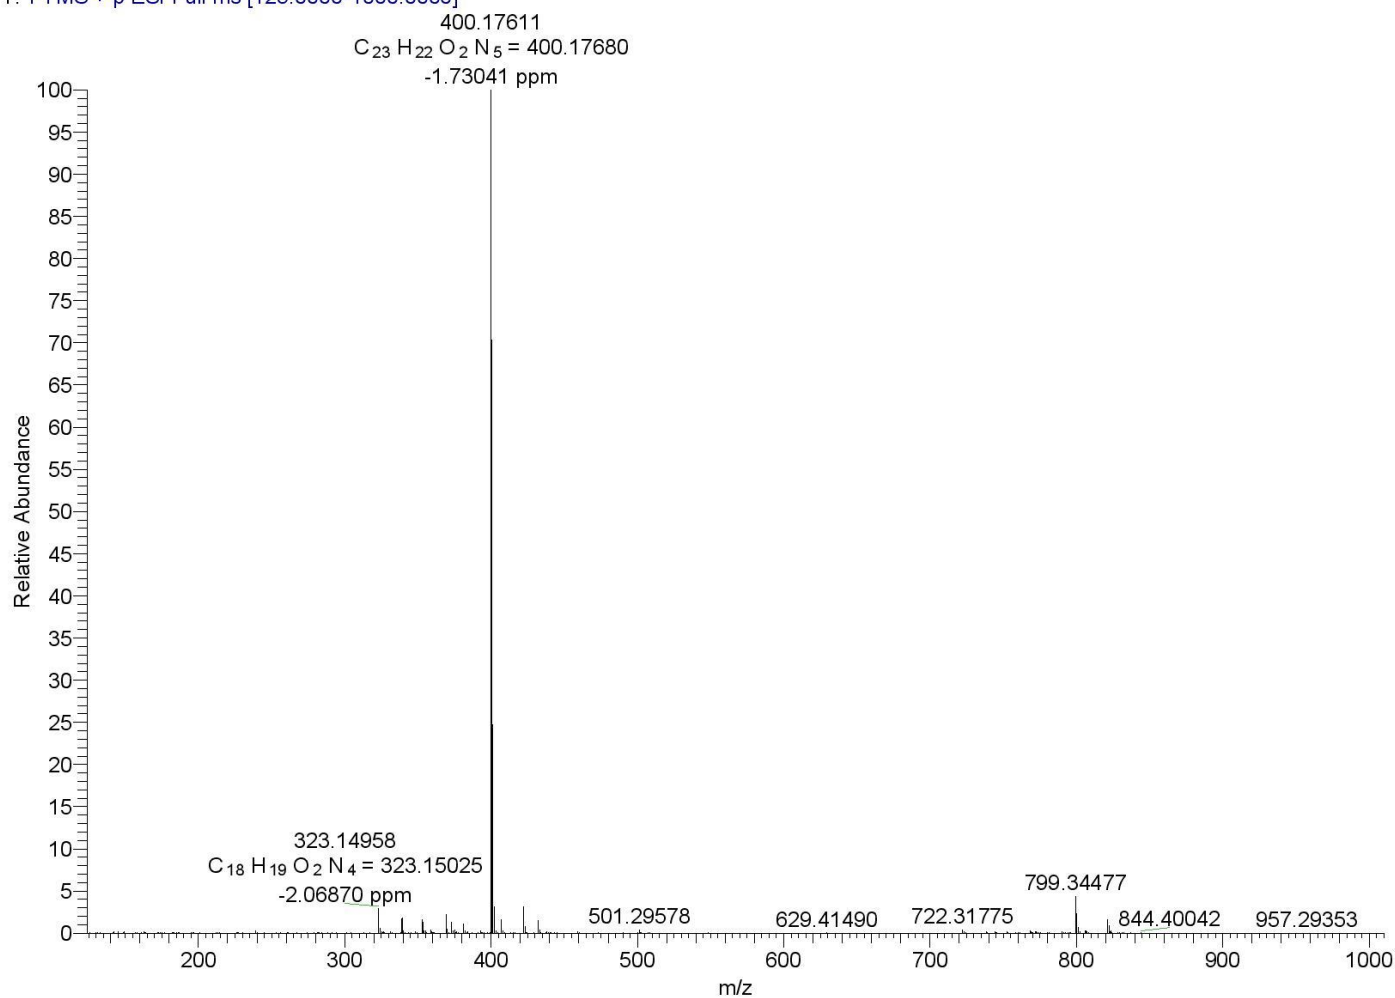

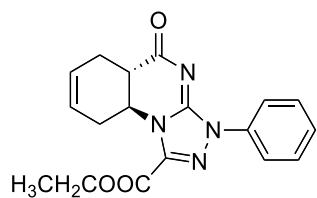

(4a*S*\*,8a*S*\*)-Ethyl 9-oxo-1-phenyl-1,4a,5,8,8a,9-hexahydro-[1,2,4]triazolo[4,3-*a*]quinazoline-3-carboxylate (**5a**)

D:\DATA\...20230126\PM-20230126-POS

01/26/23 11:18:13

4A

PM-20230126-POS #1512-1538 RT: 7.76-7.89 AV: 27 NL: 4.48E9

T: FTMS + p ESI Full ms [125.0000-1000.0000]

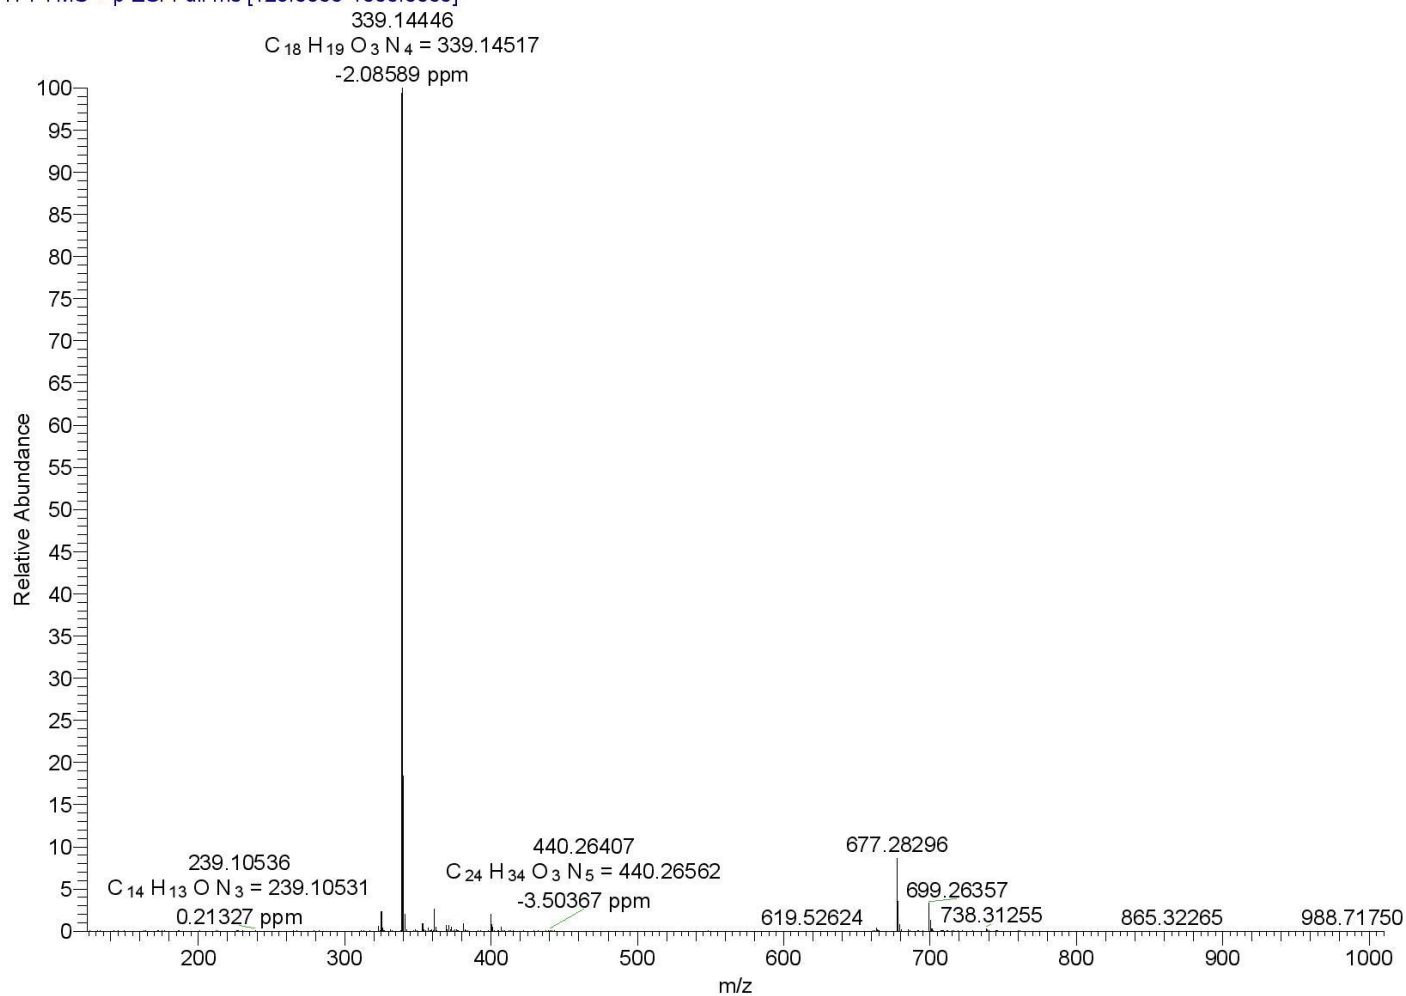

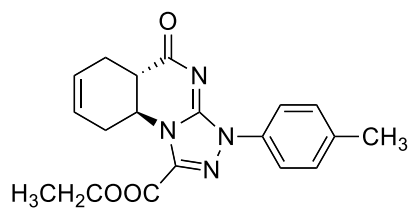

(4a*S*\*,8a*S*\*)-Ethyl 9-oxo-1-(*p*-tolyl)-1,4a,5,8,8a,9-hexahydro-[1,2,4]triazolo[4,3-*a*]quinazoline-3-carboxylate (**5b**)

D:\DATA\...20230126\PM-20230126-POS

01/26/23 11:18:13

4A

PM-20230126-POS #1696-1716 RT: 8.70-8.80 AV: 21 NL: 5.09E9

T: FTMS + p ESI Full ms [125.0000-1000.0000]

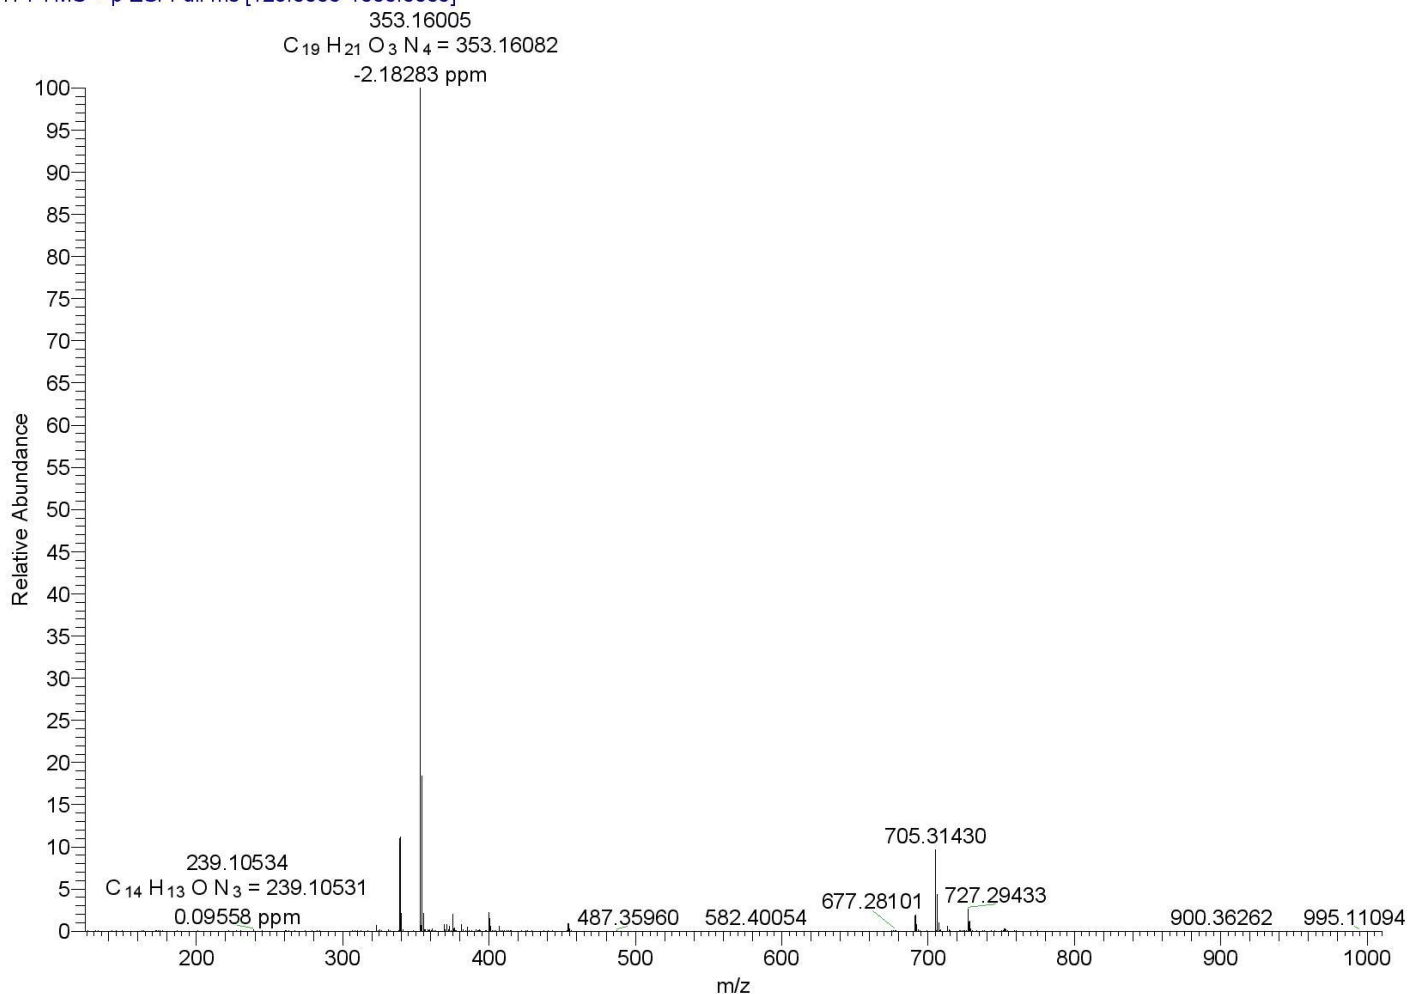

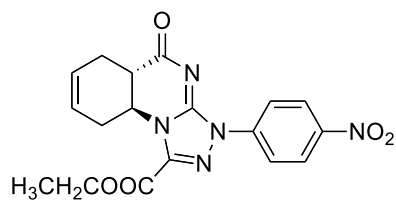

(4a*S*\*,8a*S*\*)-Ethyl 1-(4-nitrophenyl)-9-oxo-1,4a,5,8,8a,9-hexahydro-[1,2,4]triazolo[4,3-*a*]quinazoline-3-carboxylate (**5c**)

D:\DATA\...20230126\PM-20230126-POS

01/26/23 11:18:13

4A

PM-20230126-POS #1830-1863 RT: 9.39-9.55 AV: 34 NL: 8.36E8

T: FTMS + p ESI Full ms [125.0000-1000.0000]

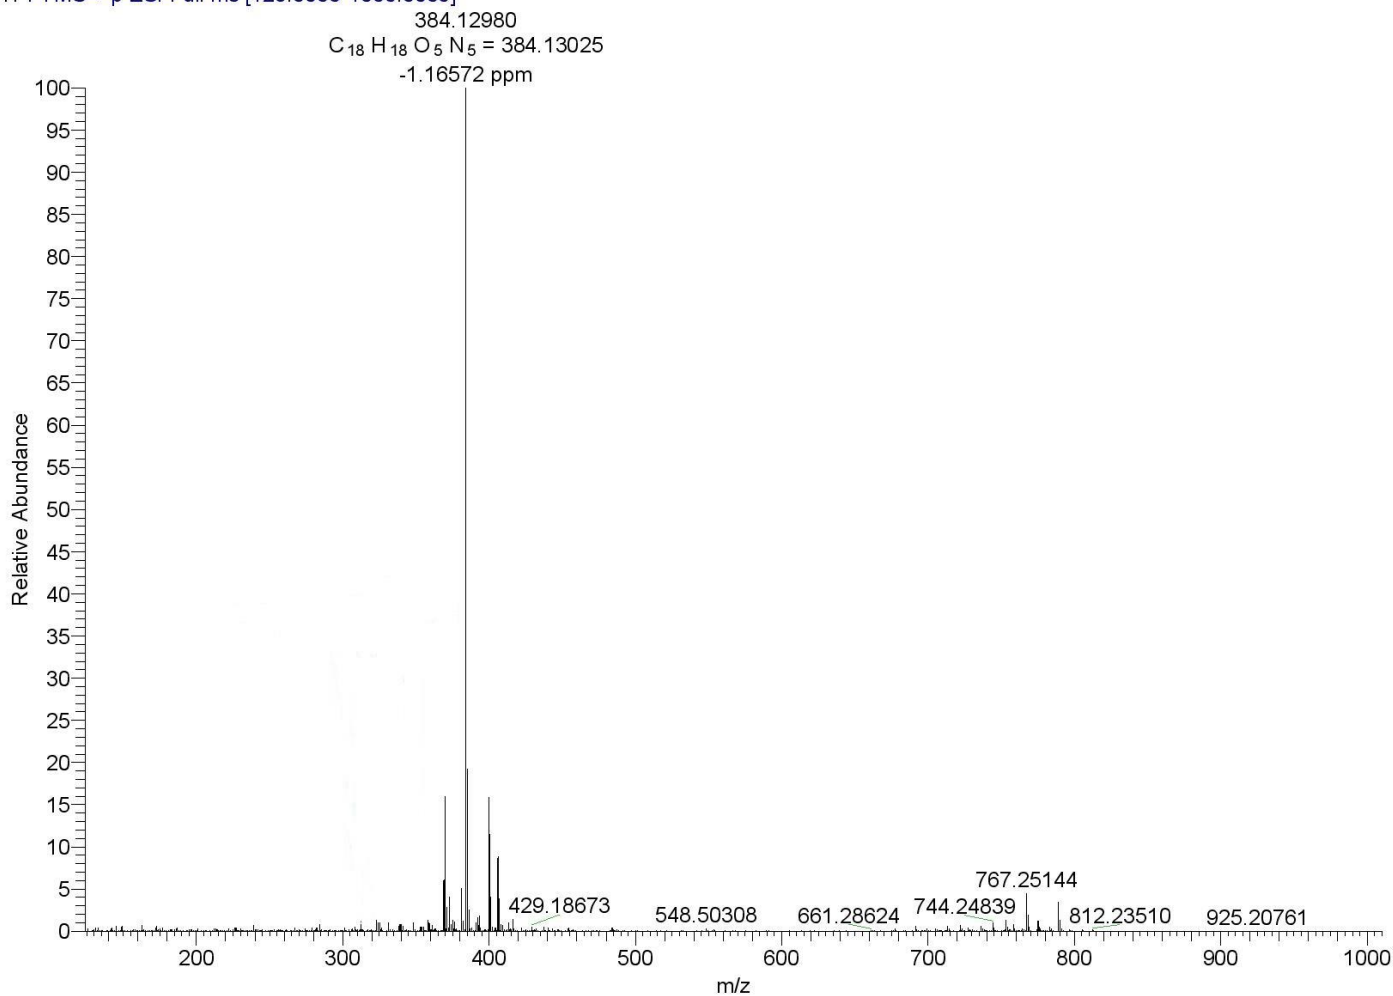

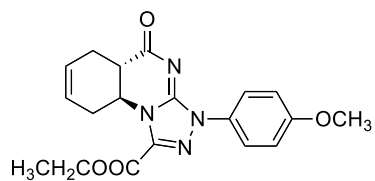

(4aS\*,8aS\*)-Ethyl 1-(4-methoxyphenyl)-9-oxo-1,4a,5,8,8a,9-hexahydro-[1,2,4]triazolo[4,3-a]quinazoline-3-carboxylate (**5d**)

D:\DATA\...20230126\PM-20230126-POS

01/26/23 11:18:13

4A

PM-20230126-POS #1973-2006 RT: 10.12-10.29 AV: 34 NL: 1.99E9

T: FTMS + p ESI Full ms [125.0000-1000.0000]

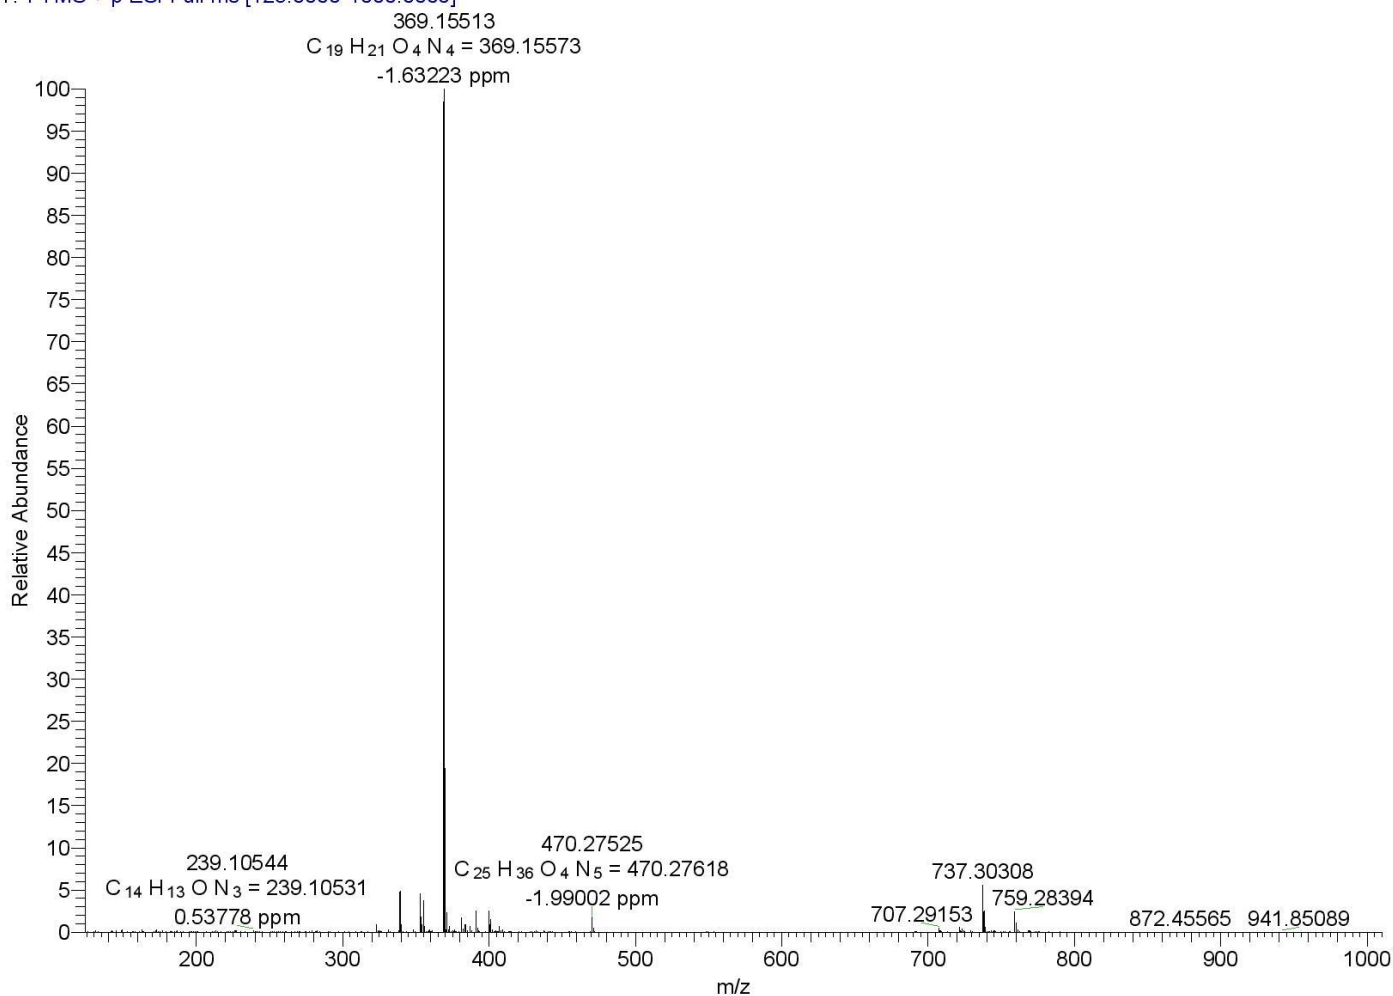



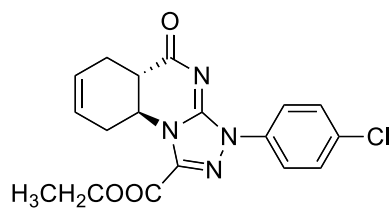

(5a*S*\*,9a*S*\*)-Ethyl 3-(4-chlorophenyl)-5-oxo-3,5,5a,6,9,9a-hexahydro-[1,2,4]triazolo[4,3-*a*]quinazoline-1-carboxylate (**5e**)

D:\DATA\...20230126\PM-20230126-POS

01/26/23 11:18:13

4A

PM-20230126-POS #2129-2162 RT: 10.92-11.09 AV: 34 NL: 1.95E9

T: FTMS + p ESI Full ms [125.0000-1000.0000]

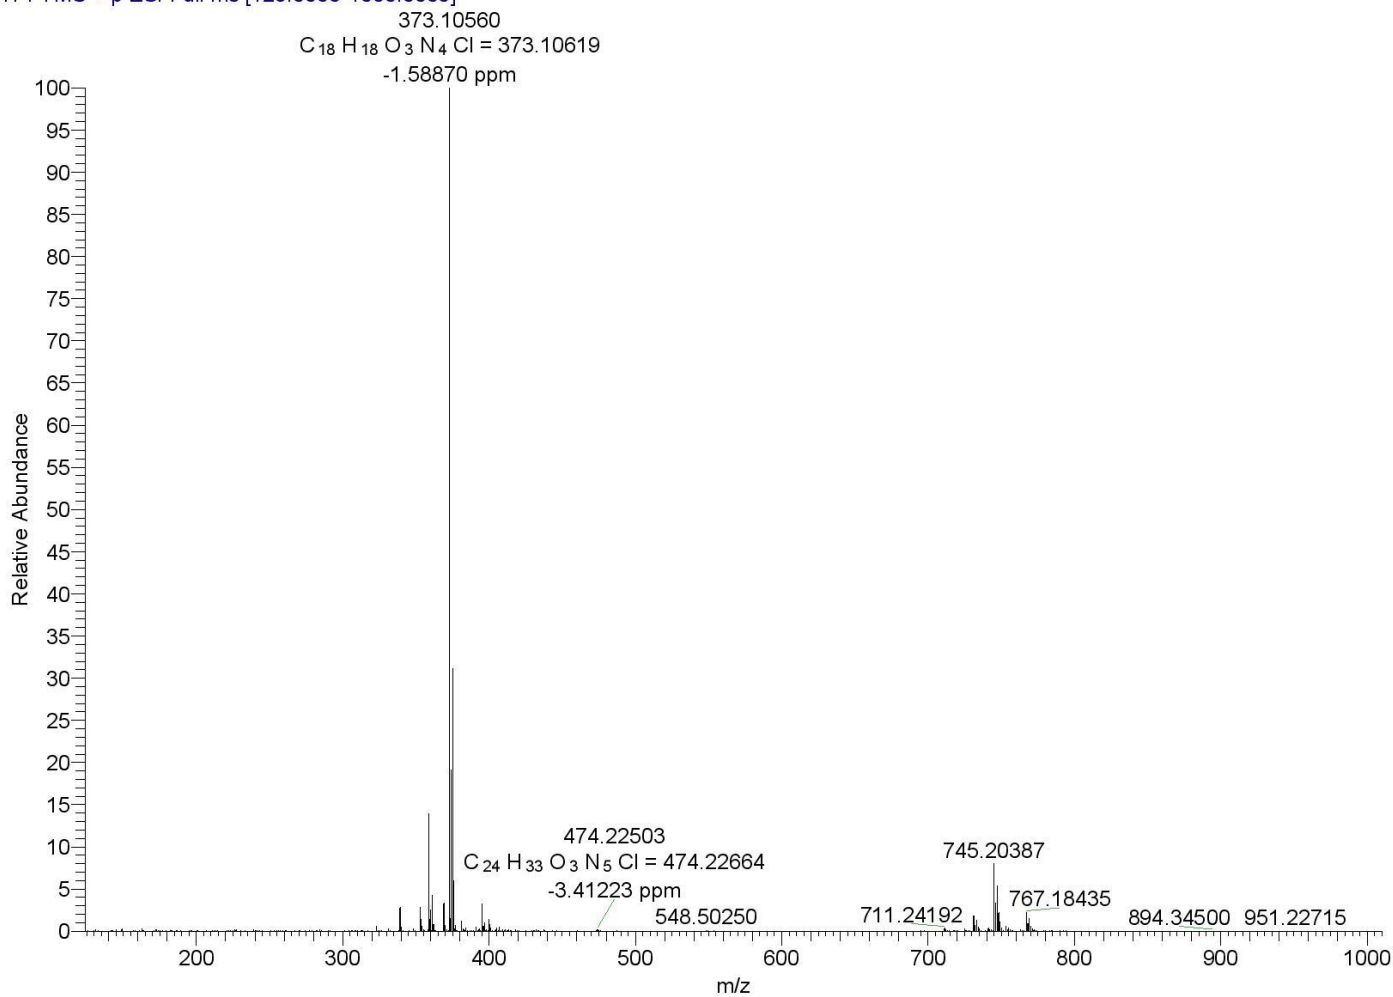

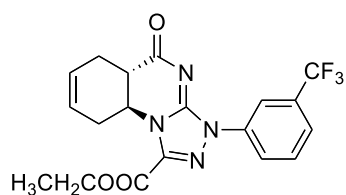

(4aS\*,8aS\*)-Ethyl 9-oxo-1-(3-(trifluoromethyl)phenyl)- 1,4a,5,8,8a,9-hexahydro-[1,2,4]triazolo[4,3-*a*]quinazoline-3-carboxylate (**5f**)

D:\DATA\...20230126\PM-20230126-POS

01/26/23 11:18:13

4A

PM-20230126-POS #2291-2324 RT: 11.75-11.92 AV: 34 NL: 1.45E9

T: FTMS + p ESI Full ms [125.0000-1000.0000]

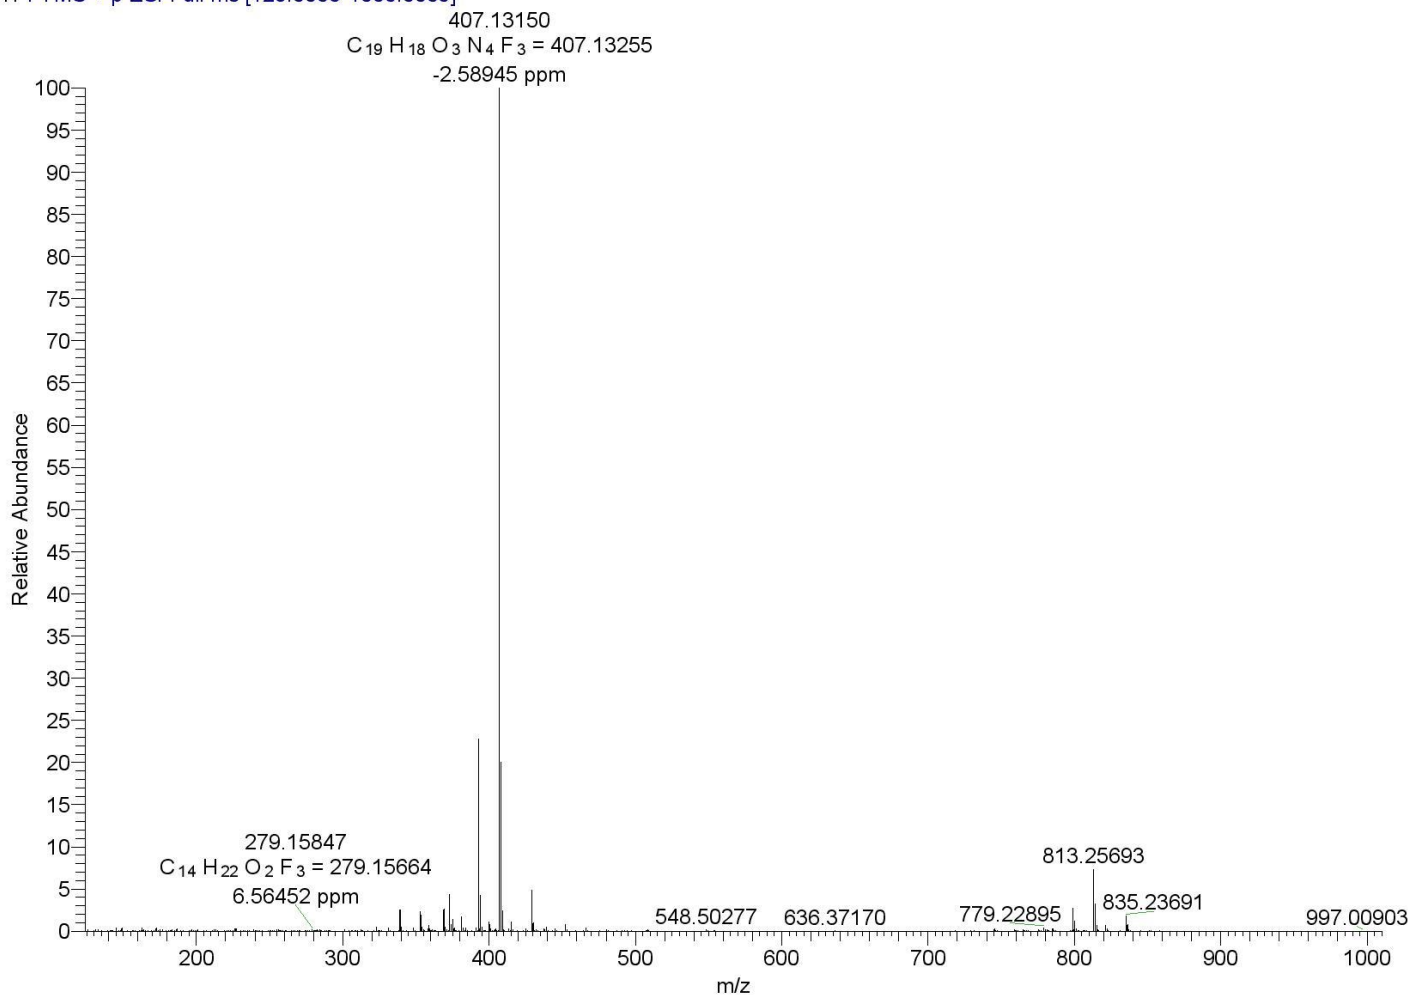

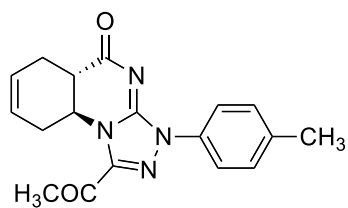

(4a*S*\*,8a*S*\*)-3-Acetyl-1-(*p*-tolyl)-4a,5,8,9-tetrahydro-  
[1,2,4]triazolo[4,3-*a*]quinazolin-9(1*H*)-one (**5g**)

D:\DATA\...20230126\PM-20230126-POS

01/26/23 11:18:13

4A

PM-20230126-POS #2438-2455 RT: 12.50-12.59 AV: 18 NL: 2.13E9

T: FTMS + p ESI Full ms [125.0000-1000.0000]

323.14953  
C<sub>18</sub> H<sub>19</sub> O<sub>2</sub> N<sub>4</sub> = 323.15025  
-2.22286 ppm

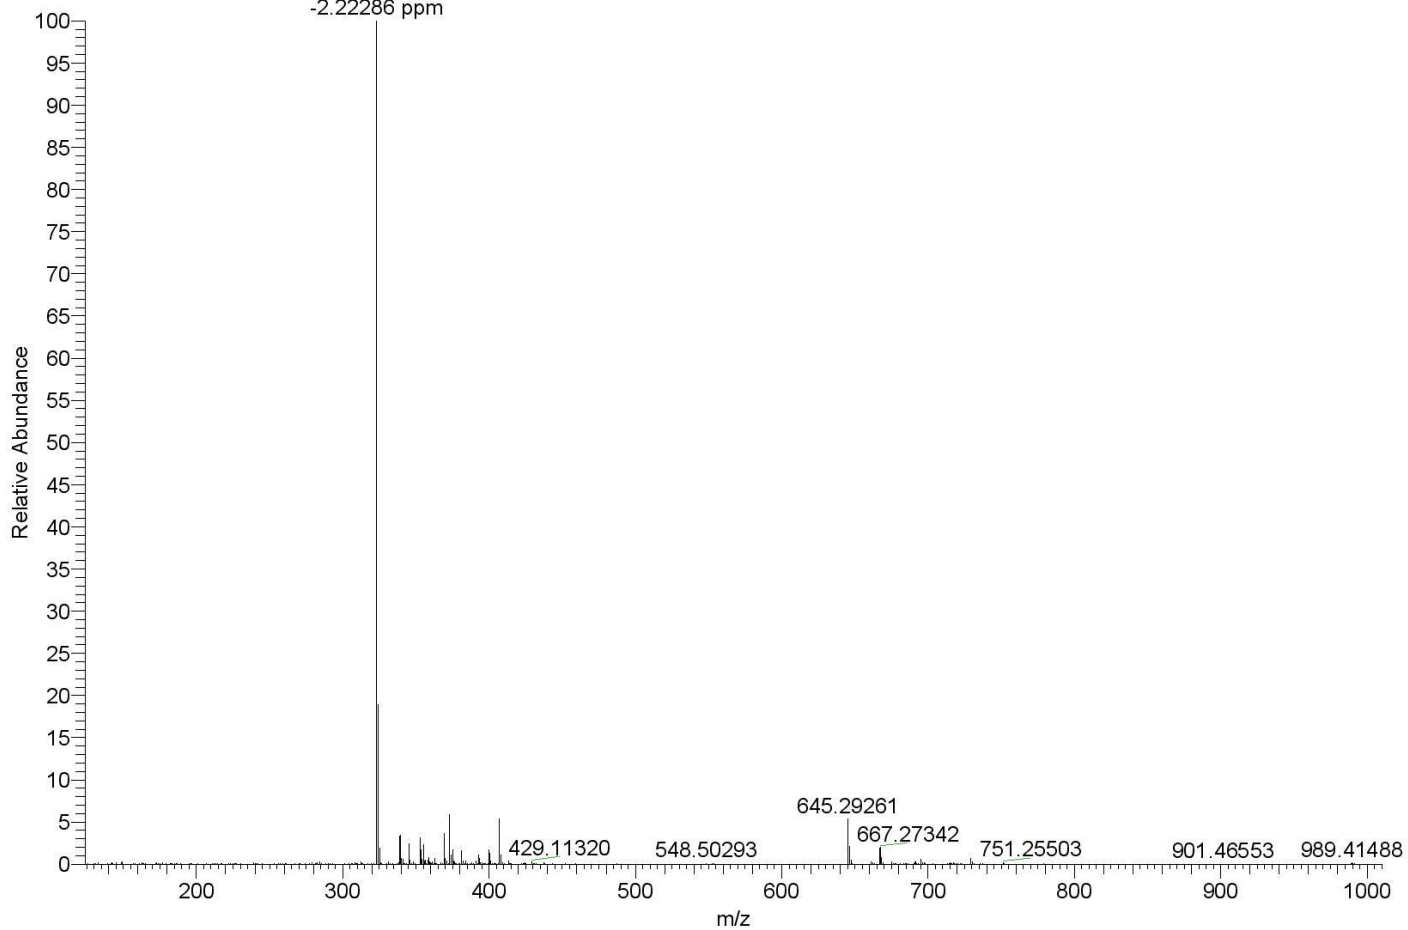

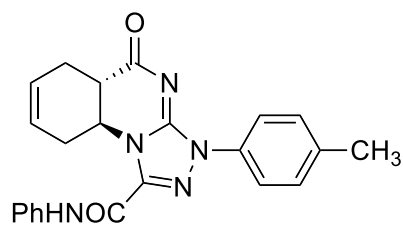

(4aS\*,8aS\*)-9-Oxo-*N*-phenyl-1-(*p*-tolyl)-1,4a,5,8,8a,9-hexahydro-[1,2,4]triazolo[4,3-*a*]quinazoline-3-carboxamide (**5h**)

D:\DATA\...20230126\PM-20230126-POS

01/26/23 11:18:13

4A

PM-20230126-POS #2580-2602 RT: 13.23-13.34 AV: 23 NL: 2.33E9

T: FTMS + p ESI Full ms [125.0000-1000.0000]

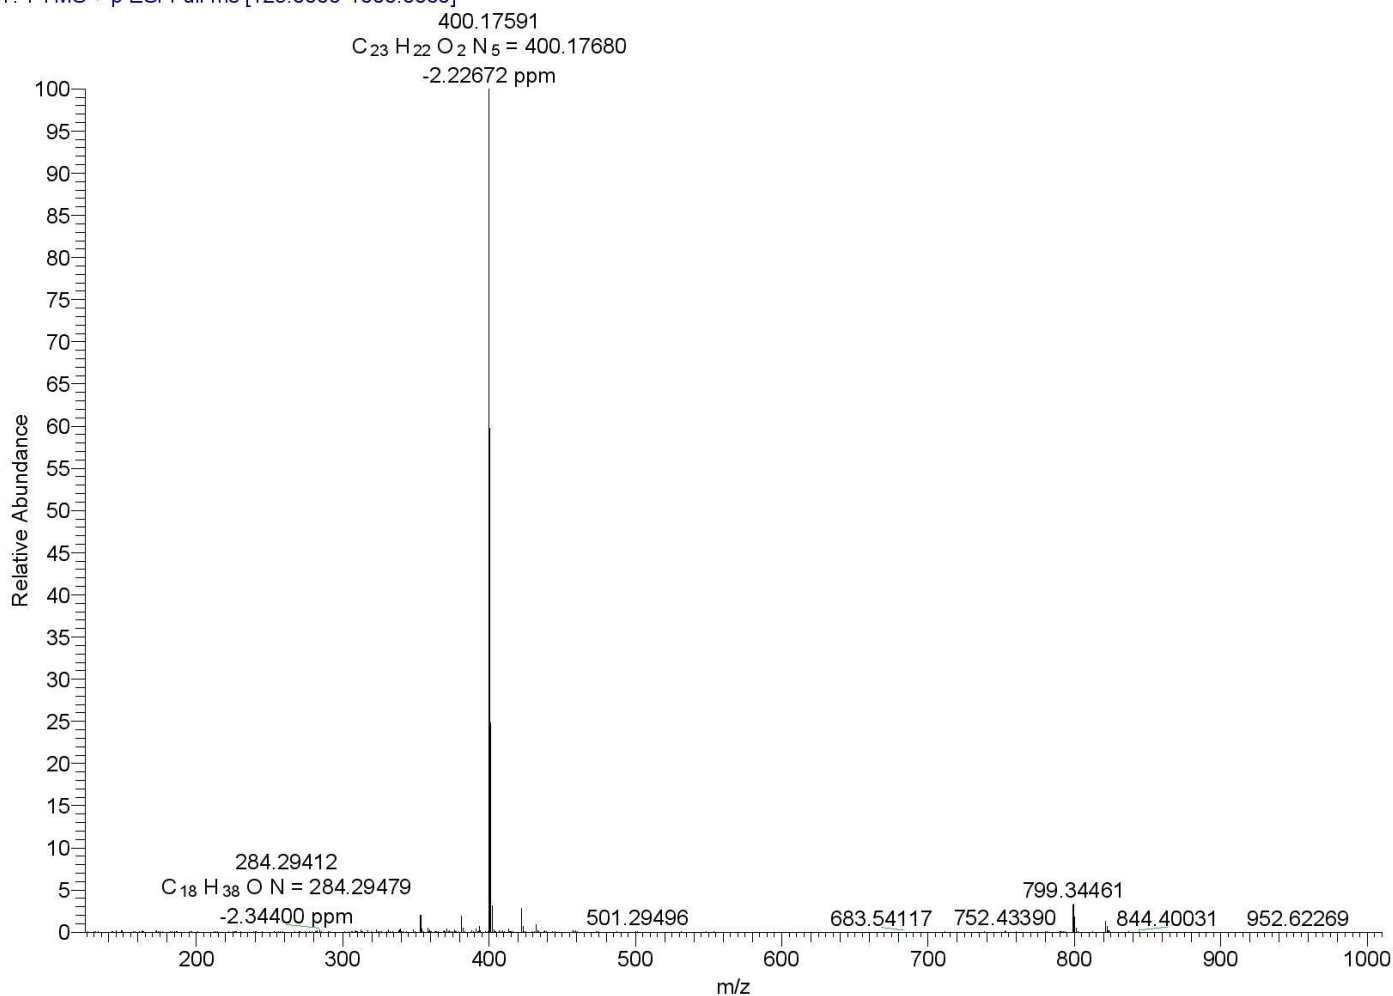

Supplement: s1 [file s1]
